# Supplementary material for: UK veterans’ mental health and well-being before and during the COVID-19 pandemic: a longitudinal cohort study
Source: PubMed Central journal article supplement — BMJ Open. 2021 Aug 27;11(8):e049815. doi: 10.1136/bmjopen-2021-049815 (PMC8406464; doi:10.1136/bmjopen-2021-049815), 2021-08-27
Supplement: bmjopen-2021-049815.draft_revisions.pdf [file bmjopen-2021-049815.draft_revisions.pdf]

# BMJ Open

BMJ Open is committed to open peer review. As part of this commitment we make the peer review history of every article we publish publicly available.

When an article is published we post the peer reviewers' comments and the authors' responses online. We also post the versions of the paper that were used during peer review. These are the versions that the peer review comments apply to.

The versions of the paper that follow are the versions that were submitted during the peer review process. They are not the versions of record or the final published versions. They should not be cited or distributed as the published version of this manuscript.

BMJ Open is an open access journal and the full, final, typeset and author-corrected version of record of the manuscript is available on our site with no access controls, subscription charges or pay-per-view fees (<http://bmjopen.bmj.com>).

If you have any questions on BMJ Open's open peer review process please email [info.bmjopen@bmj.com](mailto:info.bmjopen@bmj.com)

# BMJ Open

## UK Veterans' mental health and wellbeing before and during the COVID-19 pandemic.

|                               |                                                                                                                                                                                                                                                                                                                                                                                                                                                                                                                                                                                                                                                                                                                                                   |
|-------------------------------|---------------------------------------------------------------------------------------------------------------------------------------------------------------------------------------------------------------------------------------------------------------------------------------------------------------------------------------------------------------------------------------------------------------------------------------------------------------------------------------------------------------------------------------------------------------------------------------------------------------------------------------------------------------------------------------------------------------------------------------------------|
| Journal:                      | <i>BMJ Open</i>                                                                                                                                                                                                                                                                                                                                                                                                                                                                                                                                                                                                                                                                                                                                   |
| Manuscript ID                 | bmjopen-2021-049815                                                                                                                                                                                                                                                                                                                                                                                                                                                                                                                                                                                                                                                                                                                               |
| Article Type:                 | Original research                                                                                                                                                                                                                                                                                                                                                                                                                                                                                                                                                                                                                                                                                                                                 |
| Date Submitted by the Author: | 03-Feb-2021                                                                                                                                                                                                                                                                                                                                                                                                                                                                                                                                                                                                                                                                                                                                       |
| Complete List of Authors:     | Sharp, Marie-Louise; King's College London, Psychological Medicine<br>Serfioti, Danai; King's College London, Psychological Medicine<br>Jones, Margaret; King's College London, Psychological Medicine<br>Burdett, Howard; King's College London, Psychological Medicine<br>Pernet, David; King's College London, Psychological Medicine<br>Hull, Lisa; King's College London, Psychological Medicine<br>Murphy, Dominic; King's College London, Psychological Medicine;<br>Combat Stress<br>Wessely, Simon; King's College London, Psychological Medicine<br>Fear, Nicola; King's College London, Psychological Medicine; King's<br>Centre for Military Health Research Academic Department of Military<br>Mental Health, Psychological Medicine |
| Keywords:                     | COVID-19, EPIDEMIOLOGY, MENTAL HEALTH                                                                                                                                                                                                                                                                                                                                                                                                                                                                                                                                                                                                                                                                                                             |
|                               |                                                                                                                                                                                                                                                                                                                                                                                                                                                                                                                                                                                                                                                                                                                                                   |

SCHOLARONE™  
Manuscripts

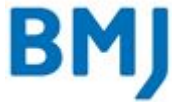

I, the Submitting Author has the right to grant and does grant on behalf of all authors of the Work (as defined in the below author licence), an exclusive licence and/or a non-exclusive licence for contributions from authors who are: i) UK Crown employees; ii) where BMJ has agreed a CC-BY licence shall apply, and/or iii) in accordance with the terms applicable for US Federal Government officers or employees acting as part of their official duties; on a worldwide, perpetual, irrevocable, royalty-free basis to BMJ Publishing Group Ltd ("BMJ") its licensees and where the relevant Journal is co-owned by BMJ to the co-owners of the Journal, to publish the Work in this journal and any other BMJ products and to exploit all rights, as set out in our [licence](#).

The Submitting Author accepts and understands that any supply made under these terms is made by BMJ to the Submitting Author unless you are acting as an employee on behalf of your employer or a postgraduate student of an affiliated institution which is paying any applicable article publishing charge ("APC") for Open Access articles. Where the Submitting Author wishes to make the Work available on an Open Access basis (and intends to pay the relevant APC), the terms of reuse of such Open Access shall be governed by a Creative Commons licence – details of these licences and which [Creative Commons](#) licence will apply to this Work are set out in our licence referred to above.

Other than as permitted in any relevant BMJ Author's Self Archiving Policies, I confirm this Work has not been accepted for publication elsewhere, is not being considered for publication elsewhere and does not duplicate material already published. I confirm all authors consent to publication of this Work and authorise the granting of this licence.

## UK Veterans' mental health and wellbeing before and during the COVID-19 pandemic.

Marie-Louise Sharp\*: King's Centre for Military Health Research, Department of Psychological Medicine, King's College London, Weston Education Centre, 10 Cutcombe Road, London, UK  
Correspondence: [marie-louise.sharp@kcl.ac.uk](mailto:marie-louise.sharp@kcl.ac.uk)

Danai Serfioti\*: King's Centre for Military Health Research, Department of Psychological Medicine, King's College London, London, UK.

Margaret Jones: King's Centre for Military Health Research, Department of Psychological Medicine, King's College London, London, UK.

Howard Burdett: King's Centre for Military Health Research, Department of Psychological Medicine, King's College London, London, UK.

David Pernet: King's Centre for Military Health Research, Department of Psychological Medicine, King's College London, London, UK.

Lisa Hull: King's Centre for Military Health Research, Department of Psychological Medicine, King's College London, London, UK.

Dominic Murphy: King's Centre for Military Health Research, Department of Psychological Medicine, King's College London, London; Combat Stress, Research Department, Tyrwhitt House, Leatherhead, Surrey, UK.

Simon Wessely: King's Centre for Military Health Research, Department of Psychological Medicine, King's College London, London, UK.

Nicola T Fear: Academic Department of Military Mental Health and King's Centre for Military Health Research, Department of Psychological Medicine, King's College London, London, UK.

\*Joint First Authors

Word Count: 3447

## ABSTRACT

**Objectives:** To investigate the impact of the COVID-19 pandemic on the health and wellbeing of UK ex-service personnel (veterans) before and during the pandemic, and to assess associations of COVID-19 experiences and stressors with mental health, alcohol use and loneliness.

**Design:** An additional wave of data was collected from a longitudinal cohort study of the UK Armed Forces.

**Setting:** Online survey June-September 2020

**Participants:** Cohort members were included if they had completed a questionnaire at phase three of the KCMHR health and wellbeing study (2014-2016), had left the Armed Forces after Regular service, were living in the UK, had consented to follow up, and provided a valid email address. Invitation emails were sent to N=3547 with a 44% response rate (n=1562).

**Primary outcome measures:** Common mental health disorders (CMD) (measured using the General Health Questionnaire, 12 items – cut off  $\geq 4$ ), hazardous alcohol use (measured using the AUDIT, 10 items – cut off  $\geq 8$ ) and loneliness (UCLA-3 loneliness scale – cut off  $\geq 6$ ).

**Results:** Veterans reported a statistically significant decrease in hazardous drinking of 48.5% to 27.6%, whilst CMD remained stable (non-statistically significant increase of 24.5% to 26.1%). 27.4% of veterans reported feelings of loneliness. The COVID-19 stressors of reporting difficulties with family or social relationships, boredom, and difficulties with health, were statistically significantly associated with CMD, hazardous drinking and loneliness, even after adjustment for previous mental health/hazardous alcohol use.

**Conclusions:** Our study suggests a COVID-19 impact on veterans' mental health, alcohol use and loneliness, particularly for those experiencing difficulties with family relationships. Veterans experienced the pandemic in similar ways to the general population and in some cases may have responded in resilient ways. Whilst stable levels of CMD and reduction in alcohol use are positive, there remains a group of veterans that may need mental health and alcohol treatment services.

## Strengths and Limitations of this Study

- Recruitment from a longitudinal cohort study where underlying characteristics are known.
- Rapid roll-out and use of validated measures for mental health and wellbeing outcomes aligned with our previous health and wellbeing study and other UK general population studies' measures.
- Only generalisable to veterans who were in military service during the Iraq/Afghanistan era.
- The study is limited to the context of the COVID-19 pandemic in the UK, June-September 2020.

## INTRODUCTION

The COVID-19 pandemic has led to large-scale societal changes all over the world, with governments implementing strict controls on movement and substantial restrictions to people's personal and work lives [1]. Despite the benefits to public health of containment strategies such as 'lockdown', self-isolation and social distancing (e.g., slower spread of infection), the social, economic, wellbeing and health consequences are likely to be profound [2, 3] and felt in the short, medium and long term.

The uncertainty and unpredictable nature of the COVID-19 pandemic has had a general negative impact on psychological and mental health [4]. The impact of COVID-19 is not uniform. Vulnerable groups, such as the elderly, young, females, people with mental or physical ill health or on low income are at greater risk of social isolation and worse health outcomes [2]. The analysis of longitudinal data from the 'Understanding Society' study indicated that mental health in the UK worsened substantially with increased GHQ scores of 8.1% on average, and worse scores for individuals with pre-existing mental health difficulties [5]. Longitudinal data from the Office for National Statistics (ONS) also reports that there has been a deterioration in mental health of the general population in Great Britain with 19.2% of adults reporting depression in June 2020 compared to 9.7% before the pandemic July 2019-March 2020 [6].

In Great Britain, there are an estimated 2.4 million ex-Service personnel (veterans) making up 5% of household residents aged 16 years and over [7]. It is currently unknown how UK veterans may experience the pandemic and the consequent effect on their health and wellbeing. Individuals with anxiety related disorders (e.g., anxiety or post-traumatic stress disorder (PTSD) appear to be at higher risk of experiencing psychological distress during the ongoing pandemic [8]. A proportion of the veteran population show increased risk of mental and physical health issues and barriers to help-seeking [9, 10], and there has been some evidence of an increase in the number of wounded veterans who have struggled with their mental and physical health since the start of lockdown in the UK [11]. Loneliness and social isolation are recognised problems for society in general, but ex-Service personnel present with unique experiences of loneliness and social isolation, closely linked to their poor re-integration into civilian life and the community [12, 13]. A study exploring how New Zealand veterans conceptualised loneliness during COVID-19 lockdown indicated that both social and physical isolation and health-related factors were significant drivers of loneliness [14]. However, in contrast to the general population (excluding emergency responders), military personnel are trained to demonstrate readiness and resilience in the face of warfare operations and stressful environments [15]. Therefore, it is unknown whether veteran's military training may also create resilient responses in the face of COVID-19 uncertainties compared to the general population.

The circumstances created by the COVID-19 pandemic may require a reconsideration of how healthcare and systems of support should be adapted to effectively accommodate the needs of the ex-Service population, especially the most vulnerable within this population [16]. The current study (Veterans-CHECK) aims to investigate the impact of the COVID-19 pandemic on the health and wellbeing of UK veterans, assessing mental health and alcohol use before and during the pandemic. It will measure veterans reports of loneliness during the pandemic and it will also assess the impact of COVID-19 experiences and stressors on mental health, hazardous alcohol use and loneliness

1  
2  
3 outcomes. Understanding this impact will be important to the Government, Armed Forces charities,  
4 and other stakeholders.  
5  
6

## 7 8 **METHOD**

### 9 10 **Study design and participants**

11 Participants were recruited from the Kings Centre for Military Health Research (KCMHR) health and  
12 wellbeing survey. This is a large-scale ongoing investigation of the physical and mental health and  
13 wellbeing of UK Armed Forces personnel from all three services (regulars and reservists) and  
14 includes personnel who were first surveyed before the recent conflicts in Iraq [17], as well as during  
15 and after the conflicts in Iraq and Afghanistan. There have been three phases of data collection,  
16 Phase 1: 2004 - 2006, Phase 2: 2007 - 2009 and Phase 3: 2014 - 2016 [9, 18, 19]. Approximately  
17 18,000 have taken part in the survey since it began. Individuals were invited to take part in the  
18 Veterans-CHECK study if: they had completed a questionnaire at Phase 3 of the health and wellbeing  
19 study, had left the UK Armed Forces, had regular service, were living in the UK, had consented to  
20 follow up and provided a valid email address. Invitation emails were sent to N=3547 of individuals  
21 who met this eligibility criteria.  
22  
23  
24  
25  
26

### 27 28 **Procedure**

29 Data collection was conducted online. Participants were asked to complete a questionnaire in their  
30 personal settings through REDCap, a secure web application for building and managing online  
31 surveys and databases [20]. Consents were completed online on the REDCap platform. The  
32 questionnaire had sections including (a) socio-demographics (b) COVID-19 experiences and stressors  
33 (c) current mental health and wellbeing measures. A full description of the study protocol is  
34 available on line Sharp, Serfioti [21].  
35  
36  
37

38 The COVID-19 experiences and stressors section included self-report of having COVID-19,  
39 experiencing isolation, bereavement, changes in employment and other challenges, such as  
40 childcare arrangements during the pandemic. Individuals were asked whether they had experienced  
41 COVID-19 stressors in the past month, followed by a list of stressors they could endorse pertaining  
42 to finances, health and other difficulties. Education and military background information were taken  
43 from Phase 3 of the cohort study [9] (rank, service branch, length of service). A variable of 'financial  
44 difficulties' was constructed using three items from the list of COVID-19 stressors. Experiencing at  
45 least one of 'Another bill-payer in your household lost their job or was unable to earn money',  
46 'Unable to pay bills', 'other financial difficulties' was categorised as experiencing 'financial  
47 difficulties'. Symptoms of common mental health disorders (CMD) were measured using the 12-item  
48 General Health Questionnaire (GHQ-12), cut-off scores for case status used were 4 or more (scores  
49 range from 0 to 12) [22]; 10-item Alcohol Use Disorder Identification Test (AUDIT) was used to  
50 measure alcohol use, cut off scores of 8 or more were used for hazardous drinking (scores range  
51 from 0 to 40), and 16 or more defined as alcohol misuse (which is likely to be harmful to health) [23],  
52 AUDIT-C score of 5 or more indicating risky drinking [24]; and the 3-item UCLA Loneliness Scale to  
53 measure feelings of loneliness with a cut off of 6 or more (scores range from 3 to 9 [25]).  
54  
55  
56  
57  
58  
59  
60

## Data Collection

One invitation email was sent to participants in June 2020 with up to three email reminders sent in June, July and August 2020, with data collection closing at the end of September 2020.

## Analyses

Response weights were generated to account for non-response and defined as the inverse probability of responding once sampled, driven by covariates shown empirically to predict response. The sociodemographic and military characteristics of the sample were described. Mental health and alcohol use during COVID-19 were compared with previous mental health and alcohol use from phase three of our health and wellbeing survey [9]. Logistic regression analyses were conducted to assess the associations between the outcomes of interest (CMD, hazardous drinking and loneliness) and COVID-19 experiences and stressors. Logistic regression analyses were adjusted for sex, age, education, marital status, rank and service. Further analyses were adjusted additionally for previous CMD or hazardous drinking status at phase three of our health and wellbeing study. All statistical analyses were performed using the statistical package, Stata (version 16.0 [26]), with survey commands used to account for weighting. Weighted percentages and odds ratios are presented in tables to account for response weights, together with unweighted cell counts.

## Ethical Approval

Full ethical approval was obtained from the King's College London Research Ethics Committee (Ref: HR-19/20-18626).

## Patient and public involvement

Veterans who sit on our research board provided feedback on the content and flow of the questionnaire; the questionnaire was amended and refined accordingly. Findings from the study will be disseminated to study participants through a newsletter, social media outlets and our stakeholders that represent veteran communities.

## RESULTS

The response rate was 44% (1562/3547). Responders were more likely to be older, officers, of higher educational status, have served in the RAF, were less likely to have reported alcohol misuse, but more likely to have reported multiple physical symptoms, and poor/fair health at phase 3 of the cohort (Supplemental Information Table 1). Table 1 describes the socio-demographic and military characteristics of those who participated in the study. The majority of participants were male, Non-Commissioned Officers (NCO), had served in the Army, were educated to A-Level or degree level and in a relationship. Over half the sample had left service 10 or more years ago and the majority were in employment before the pandemic. The majority of respondents lived in England (85.8%, n=1334).

### **Table 1 – Socio-demographic and military characteristics of sample (N=1562)**

\*percentages are weighted with unweighted cell counts



| Characteristic                                                   | n (%) *       |
|------------------------------------------------------------------|---------------|
| <b>Sex</b>                                                       |               |
| male                                                             | 1383 (89.26%) |
| female                                                           | 179 (10.74%)  |
| <b>Age band (years at completion of Veterans-CHECK survey)</b>   |               |
| 25-34                                                            | 46 (6.65%)    |
| 35-44                                                            | 272 (22.97%)  |
| 45-54                                                            | 554 (35.93%)  |
| 55-64                                                            | 514 (26.95%)  |
| 65 and over                                                      | 176 (7.50%)   |
| <b>Rank (when in service)</b>                                    |               |
| Officer                                                          | 478 (26.11%)  |
| NCO                                                              | 954 (61.45%)  |
| Other rank                                                       | 130 (12.44%)  |
| <b>Service (when in service)</b>                                 |               |
| Royal Navy                                                       | 290 (19.27%)  |
| Army                                                             | 873 (58.26%)  |
| RAF                                                              | 399 (22.47%)  |
| <b>Length of time since leaving service</b>                      |               |
| Within last year                                                 | 20 (1.28%)    |
| One year up to five years                                        | 166 (12.62%)  |
| Five years up to 10 years                                        | 506 (33.86%)  |
| More than 10 years                                               | 870 (52.24%)  |
| <b>Education level (reported at Phase 3 of the cohort study)</b> |               |
| No qual or O level                                               | 385 (27.23%)  |
| A level                                                          | 506 (33.91%)  |
| degree                                                           | 671 (38.86%)  |
| <b>Relationship status (current)</b>                             |               |
| In a relationship                                                | 1361 (86.76%) |
| Single                                                           | 72 (5.67%)    |
| Ex relationship                                                  | 127 (7.57%)   |
| <b>Employment status (before the COVID-19 pandemic)</b>          |               |
| Employed                                                         | 1246 (83.41%) |
| Retired                                                          | 232 (11.18%)  |
| Economically inactive                                            | 78 (5.41%)    |

### Before and during COVID-19 pandemic - mental health and alcohol use

Overall, the percentage of participants meeting the threshold for CMD remained stable from pre-pandemic levels, increasing only slightly from 24.5% (n=354) to 26.1% (n=376), where this increase was not statistically significant (Table 2). All measures of alcohol use were statistically significant reductions from pre-pandemic levels. Veterans reported hazardous drinking reductions from 48.5% (n=642) to 27.6% (n=367), alcohol misuse reductions of 9.2% (n=119) to 3.7% (n=50) and high-risk consumption reductions of 73.0% (n=987) to 49.2% (n=649).

**Table 2 – Pre and during pandemic mental health and alcohol use outcomes**

\*percentages are weighted

|                                                     | <b>Before COVID-19</b><br>Phase 3<br>(2014-2016)<br>N (%)* | <b>During COVID-19</b><br>Vet-CHECK<br>(June-Sept 2020)<br>N (%) | P value** |
|-----------------------------------------------------|------------------------------------------------------------|------------------------------------------------------------------|-----------|
| <b>Common Mental Disorders</b><br>(GHQ-12 $\geq$ 4) | 354 /1539 (24.50%)                                         | 373/1539 (26.10%)                                                | 0.276     |
| <b>Hazardous Drinking</b><br>(AUDIT Case 8 $\geq$ ) | 642/1387 (48.48%)                                          | 360/1387 (27.61%)                                                | <0.0001   |
| <b>Alcohol Misuse</b><br>(AUDIT Case 16 $\geq$ )    | 119/1387 (9.19%)                                           | 48/1387 (3.71%)                                                  | <0.0001   |
| <b>Alcohol Consumption</b><br>AUDIT-C ( $\geq$ 5)   | 987/1366 (73.01%)                                          | 649/1366 (49.24%)                                                | <0.0001   |

\*\*Adjusted Wald test

### Loneliness, COVID-19 experiences and stressors

27.4% (n=395) of the sample reported feelings of loneliness. Tables 3 and 4 describe COVID-19 experiences and stressors. 14.8% (n=226) of the sample reported definitely or probably having COVID-19, with 16.5% (n=249) of the sample having to self-isolate. 18.5% (n=286) of the sample knew someone who died from COVID-19. The large majority of the sample had no change in employment or were furloughed (91.6%, n=1425). Just under half of the sample reported being key workers (46.2%, n=674), with 19% (n=131) of these key workers being health and social care key workers.

The large majority of the sample lived with their spouse/partner (84.6%, n=1328). Just under a quarter of the sample were responsible for two or more children under the age of 18 years old (24.2%, n=320). Just under half of those who had children they were responsible for had to change childcare arrangements because of the pandemic (47.6%, n=214) and 44.7% (n=94) reported the change in childcare arrangements had a negative impact on their life. 17.9% (n=271) reported extra or new caring responsibilities because of the pandemic. The most frequently reported COVID-19 stressors were boredom (24.9%, n=352), having to change or delay major plans (23.7%, n=364) and difficulties with family/other social relationships (19.5%, n=278).

### Association of mental health outcomes and COVID-19 experiences and stressors

Table 3 and 4 presents odds ratios (AOR) for the association between CMD symptoms, hazardous drinking and loneliness adjusted for sex, age, education, marital status, rank and Service.

#### *Common Mental Disorders*

Increased odds of reporting symptoms of CMD was associated with self-report of definitely or probably having COVID-19, knowing someone who died from COVID-19, reporting a change for worse in employment during the pandemic (compared to no change/furlough), not being a key

worker, living alone, being responsible for two or more children under 18 years of age (compared to no children), having to change childcare arrangements because of the pandemic, having usual caring responsibilities (compared to none) or extra/new caring responsibilities because of the pandemic (Table 3). Increased odds of reporting CMD were associated with all COVID-19 stressors (Table 4). The stressors with the largest effect sizes included having difficulties with health, difficulties with family/other social relationships, work difficulties, and having financial problems.

### *Hazardous Drinking*

Increased likelihood of reporting drinking at hazardous levels was associated with having difficulties with health, difficulties with family/other social relationships, and experiencing boredom.

### *Loneliness*

Increased reporting of loneliness was associated with knowing someone who died from COVID-19, being a health and social care key worker (compared to other key workers), living alone, being responsible for one or two or more children (compared to none), and having usual caring responsibilities (compared to none) (Table 3). Increased reporting of loneliness was associated with several COVID-19 stressors (Table 4), the largest effect sizes were reporting difficulties with family/other social relationships, difficulties with health, and experiencing boredom.

**Table 3 – Association between CMD, Hazardous drinking and Loneliness and COVID-19 experiences** (Weighted percentages and odds ratios are presented in tables to account for response weights, together with unweighted cell counts.)

\* Adjusted for sex, age, education, marital status, rank, service

| COVID-19 Experiences                        | n (%)         | Common Mental Disorders (CMD) (AOR 95% CI) *<br>N = 376<br>(25.97%) | Hazardous drinking (AUDIT ≥8) (AOR 95% CI) *<br>N = 367<br>(27.82%) | Loneliness (AOR 95% CI) *<br>N = 395<br>(27.42%) |
|---------------------------------------------|---------------|---------------------------------------------------------------------|---------------------------------------------------------------------|--------------------------------------------------|
| <b>Had or have COVID-19</b>                 |               |                                                                     |                                                                     |                                                  |
| No                                          | 866 (53.80%)  | 1.00                                                                | 1.00                                                                | 1.00                                             |
| Yes (definitely/probably)                   | 226 (14.83%)  | 1.55 (1.08-2.22)                                                    | 0.80 (0.55-1.16)                                                    | 1.36 (0.96-1.95)                                 |
| Don't know                                  | 470 (31.37%)  | 1.06 (0.79-1.43)                                                    | 0.78 (0.58-1.05)                                                    | 1.24 (0.93-1.66)                                 |
| <b>Had to isolate</b>                       |               |                                                                     |                                                                     |                                                  |
| No                                          | 1310 (83.51%) | 1.00                                                                | 1.00                                                                |                                                  |
| Yes                                         | 249 (16.49%)  | 1.33 (0.96-1.85)                                                    | 0.89 (0.63-1.26)                                                    | 1.29 (0.93-1.79)                                 |
| <b>Know someone who died from COVID-19?</b> |               |                                                                     |                                                                     |                                                  |
| No                                          | 1276 (81.52%) | 1.00                                                                | 1.00                                                                | 1.00                                             |
| Yes                                         | 286 (18.48%)  | 1.76 (1.29-2.40)                                                    | 0.95 (0.68-1.33)                                                    | 1.54 (1.13-2.12)                                 |
| <b>Change in employment</b>                 |               |                                                                     |                                                                     |                                                  |
| no change or furlough                       | 1425 (91.60%) | 1.00                                                                | 1.00                                                                | 1.00                                             |
| change for worse                            | 134 (8.40%)   | 3.14 (2.15-4.60)                                                    | 1.26 (0.82-1.93)                                                    | 1.49 (0.98-2.29)                                 |
| <b>Key Worker</b>                           |               |                                                                     |                                                                     |                                                  |

|                                                             |               |                  |                  |                  |
|-------------------------------------------------------------|---------------|------------------|------------------|------------------|
| Not a key worker                                            | 880 (53.72%)  | 1.42 (1.06-1.89) | 1.09 (0.81-1.45) | 1.23 (0.92-1.65) |
| Key worker – Health and social care                         | 131 (8.79%)   | 1.40 (0.85-2.31) | 0.81 (0.47-1.38) | 1.69 (1.05-2.70) |
| Key workers - All other roles                               | 543 (37.48%)  | 1.00             | 1.00             | 1.00             |
| <b>Who usually live with</b>                                |               |                  |                  |                  |
| Live alone                                                  | 170 (11.04%)  | 2.11 (1.07-4.16) | 1.56 (0.82-2.96) | 2.49 (1.36-4.57) |
| Live with spouse/partner                                    | 1328 (84.55%) | 1.00             | 1.00             | 1.00             |
| Live with others                                            | 59 (4.41%)    | 1.59 (0.55-4.60) | 0.95 (0.35-2.59) | 1.60 (0.71-3.61) |
| <b>Children</b>                                             |               |                  |                  |                  |
| Have no children                                            | 357 (24.50%)  | 1.00             | 1.00             | 1.00             |
| Have children but not responsible for them                  | 666 (36.04%)  | 1.14 (0.78-1.67) | 0.93 (0.64-1.36) | 1.17 (0.79-1.73) |
| Responsible for one child under 18 years old                | 214 (15.23%)  | 0.87 (0.53-1.41) | 0.92 (0.59-1.44) | 1.62 (1.03-2.55) |
| Responsible for two or more children under 18 years of age  | 320 (24.23%)  | 1.56 (1.03-2.37) | 0.87 (0.57-1.33) | 1.94 (1.26-3.00) |
| <b>Changed childcare arrangements</b>                       |               |                  |                  |                  |
| No                                                          | 243 (52.40%)  | 1.00             | 1.00             | 1.00             |
| Yes                                                         | 214 (47.60%)  | 2.31 (1.47-3.64) | 1.15 (0.73-1.84) | 1.00 (0.63-1.57) |
| <b>Impact of changed childcare arrangements</b>             |               |                  |                  |                  |
| Positive impact                                             | 33 (14.08%)   | 0.60 (0.21-1.67) | 1.16 (0.45-3.00) | 0.59 (0.18-1.93) |
| Negative impact                                             | 94 (44.73%)   | 1.96 (0.99-3.89) | 1.39 (0.68-2.85) | 1.66 (0.78-3.52) |
| Neutral impact                                              | 87 (41.19%)   | 1.00             | 1.00             | 1.00             |
| <b>Usual caring responsibilities (pre pandemic)</b>         |               |                  |                  |                  |
| No                                                          | 1361 (87.55%) | 1.00             | 1.00             | 1.00             |
| yes                                                         | 195 (12.45%)  | 1.74 (1.20-2.53) | 0.79 (0.52-1.21) | 1.63 (1.11-2.40) |
| <b>Extra or new caring responsibilities during pandemic</b> |               |                  |                  |                  |
| No                                                          | 1285 (82.10%) | 1.00             | 1.00             | 1.00             |
| yes                                                         | 271 (17.90%)  | 1.77 (1.29-2.43) | 1.01 (0.71-1.42) | 1.35 (0.97-1.87) |

**Table 4 – Association between CMD, Hazardous drinking and Loneliness and COVID-19 stressors** (Weighted percentages and odds ratios are presented in tables to account for response weights, together with unweighted cell counts.)

\* Adjusted for sex, age, education, marital status, rank, service

| COVID-19 Stressors | n (%) | Common Mental Disorders (CMD) (AOR 95% CI) * | Hazardous drinking (AUDIT ≥8) (AOR 95% CI) * | Loneliness (AOR 95% CI) *<br>N = 395<br>(27.42%) |
|--------------------|-------|----------------------------------------------|----------------------------------------------|--------------------------------------------------|
|                    |       |                                              |                                              |                                                  |

|                                                            |               | N = 376<br>(25.97%) | N = 367<br>(27.82%) |                  |
|------------------------------------------------------------|---------------|---------------------|---------------------|------------------|
| <b>Financial problems</b>                                  |               |                     |                     |                  |
| No                                                         | 1379 (86.96%) | 1.00                | 1.00                | 1.00             |
| yes                                                        | 183 (13.04%)  | 2.93 (2.06-4.15)    | 1.04 (0.69-1.57)    | 1.75 (1.20-2.56) |
| <b>Had difficulty accessing enough food</b>                |               |                     |                     |                  |
| No                                                         | 1533 (97.91%) | 1.00                | 1.00                | 1.00             |
| Yes                                                        | 29 (2.09%)    | 3.10 (1.35-7.16)    | 1.64 (0.70-3.82)    | 3.91 (1.57-9.73) |
| <b>Had difficulty accessing medication</b>                 |               |                     |                     |                  |
| No                                                         | 1490 (94.86%) | 1.00                | 1.00                | 1.00             |
| Yes                                                        | 72 (5.14%)    | 2.32 (1.34-4.02)    | 1.01 (0.52-1.95)    | 3.48 (1.90-6.38) |
| <b>Had difficulty with health</b>                          |               |                     |                     |                  |
| No                                                         | 1374 (87.49%) | 1.00                | 1.00                | 1.00             |
| Yes                                                        | 188 (12.51%)  | 6.94 (4.91-9.83)    | 1.73 (1.19-2.51)    | 2.96 (2.07-4.22) |
| <b>Had somebody close in hospital</b>                      |               |                     |                     |                  |
| No                                                         | 1460 (93.24%) | 1.00                | 1.00                | 1.00             |
| Yes                                                        | 102 (6.76%)   | 2.40 (1.51-3.81)    | 1.25 (0.76-2.07)    | 1.33 (0.81-2.18) |
| <b>Lost somebody close</b>                                 |               |                     |                     |                  |
| No                                                         | 1489 (94.90%) | 1.00                | 1.00                | 1.00             |
| Yes                                                        | 73 (5.10%)    | 1.85 (1.06-3.22)    | 0.63 (0.32-1.26)    | 1.13 (0.64-2.01) |
| <b>Had to change delay or major plan</b>                   |               |                     |                     |                  |
| No                                                         | 1198 (76.26%) | 1.00                | 1.00                | 1.00             |
| Yes                                                        | 364 (23.74%)  | 2.50 (1.89-3.32)    | 1.16 (0.85-1.57)    | 1.88 (1.40-2.51) |
| <b>Difficulties with family/other social relationships</b> |               |                     |                     |                  |
| No                                                         | 1284 (80.53%) | 1.00                | 1.00                | 1.00             |
| Yes                                                        | 278 (19.47%)  | 5.29 (3.85-7.27)    | 1.70 (1.22-2.36)    | 4.01 (2.91-5.55) |
| <b>Difficulties with internet access</b>                   |               |                     |                     |                  |
| No                                                         | 1455 (92.95%) | 1.00                | 1.00                | 1.00             |
| Yes                                                        | 107 (7.05%)   | 1.84 (1.17-2.88)    | 1.06 (0.65-1.72)    | 2.28 (1.43-3.63) |
| <b>Work difficulties</b>                                   |               |                     |                     |                  |
| No                                                         | 1293 (81.03%) | 1.00                | 1.00                | 1.00             |
| Yes                                                        | 269 (18.97%)  | 4.12 (3.01-5.65)    | 1.39 (1.00-1.94)    | 2.35 (1.70-3.25) |
| <b>Difficulties with pets</b>                              |               |                     |                     |                  |
| No                                                         | 1522 (97.46%) | 1.00                | 1.00                | 1.00             |
| Yes                                                        | 40 (2.54%)    | 2.79 (1.44-5.41)    | 0.90 (0.40-2.05)    | 1.28 (0.63-2.59) |
| <b>Boredom</b>                                             |               |                     |                     |                  |
| No                                                         | 1210 (75.06%) | 1.00                | 1.00                | 1.00             |
| Yes                                                        | 352 (24.94%)  | 2.88 (2.15-3.85)    | 1.75 (1.28-2.39)    | 2.96 (2.21-3.96) |

## Adjusting for previous CMD and hazardous drinking

Adjusting for previous CMD or hazardous drinking case status reported at phase three of our health and wellbeing study attenuated the association of CMD and of hazardous drinking with COVID-19 experiences and stressors, but it did not change the direction of association, and the majority of associations remained significant at the 95% level (supplemental information Table 2). For four COVID-19 experiences or stressors, the associations become non-significant, yet their effect size remained large. These included the association of reporting CMD symptoms and living alone, difficulty access enough food, difficulty accessing medication, and losing someone close to you (supplemental information Table 2).

## DISCUSSION

Compared to pre-pandemic levels taken in 2014-2016, levels of CMDs in UK veterans remained stable. Veterans reported statistically significant reductions in levels of hazardous drinking during the pandemic compared to pre-pandemic levels. 27.4% reported feelings of loneliness. Just under 15% of people in the study self-reported definitely or probably having COVID-19. Half of individuals with children who they were responsible for reported that changes in childcare negatively affected their life and nearly a fifth of individuals had new or extra caring responsibilities because of the pandemic. The most common COVID-19 stressors reported were boredom, having to change major life plans, and difficulties with family or other social relationships. The COVID-19 stressors of difficulties with family or other social relationships, boredom and difficulties with health were all associated with veterans reporting CMD, hazardous drinking and loneliness. Adjustment for previous CMD or hazardous alcohol use did not change the direction of association and the majority of associations remained statistically significant. Our study identifies there may be a specific impact of COVID-19 experiences and stressors on veterans' CMD, alcohol use and loneliness outcomes.

CMD levels have remained stable with a small, statistically non-significant increase. This should be compared to population data showing significant increases in CMD in the general population. For example, ONS figures found a 9.5% increase in depression from the period July 2019-March 2020 to June 2020 [6]; The UKHLS reported a 7.6% increase in CMD between 2017-2019 and April 2020 [4]. Veterans' pre-pandemic CMD levels were higher than the general population levels (Vet-CHECK Phase three 2014-2016: 24.5% v UKHLS 2018-2019: 18.9% [4]) but were similar during the pandemic (UK studies ranging from 26.0% to 30.6% [4, 27, 28]). The absence of a similarly large increase in CMD caseness in the veteran group may indicate resilient responses in this group who have been previously trained in readiness for deployments, resilience and coping strategies [15, 29, 30]

From further analyses of the veteran sample (available upon request), of the 373 CMD cases, 214 (56.6%) of these were new cases since 2014-2016 (with a similar number of remitting cases). Hence whilst numbers potentially needing clinical treatment remain similar, there may be new individuals that need to engage with services. Additionally, as a majority of the COVID-19 experiences and stressors (particularly difficulties with health, work, or family/other social relationships) were associated with CMD symptoms, it may be this veteran group with CMD particularly impacted by COVID-19 pressures. Similar COVID-19 pressures on families and negative associations with mental health outcomes are reported in US samples [31]. As found in our study, the UKHLS finds negative mental health impacts for parents with childcare responsibilities and home schooling requirements



1  
2  
3 during the pandemic [32]. One fifth of our sample had extra or new caring responsibilities during the  
4 pandemic which may have added to family stress levels. Previous research has shown how  
5 important social connection is for carers' mental health outcomes [33] and lockdown and social  
6 distancing needs may have disrupted support for carers in this sample.  
7  
8

9  
10 Compared to veterans drinking behaviours pre-pandemic in 2014-2016, levels of hazardous drinking  
11 and alcohol misuse reduced (hazardous drinking: 48.5% v 27.6% and alcohol misuse: 9.2% v 3.7%  
12 respectively). However, we found the Veterans-CHECK sample to be consuming alcohol, as  
13 measured by the AUDIT-C, at higher levels than the general population in England during the  
14 pandemic (Veterans-CHECK 49.2% v 38.3% [34]). Hence despite reductions in hazardous drinking and  
15 alcohol misuse for veterans in this sample, and increases in general population high-risk drinking, a  
16 higher proportion of veterans are still in high risk drinking categories. This finding continues to  
17 mirror previous studies that find veterans drinking at higher levels than the general population [35].  
18  
19

20  
21 There may be several explanations for the reduction in hazardous drinking. Alcohol has often been  
22 using as a social bonding tool in Armed Forces community [36, 37], therefore the closing or  
23 restrictions placed on the hospitality business may explain the reduction in alcohol consumption.  
24 Alternatively, this may represent a general population trend observed in the UK population where  
25 high risk drinkers have reduced their alcohol consumption [28, 34]. The Covid-19 Social Study  
26 reports that drinking less during the pandemic was associated with being male [38], and our sample  
27 is predominantly male. Few COVID-19 stressors were associated with hazardous drinking and  
28 therefore we could surmise that alcohol was not being used as a coping mechanism in this  
29 community during the pandemic.  
30  
31  
32  
33

34 Our veteran sample reported lower levels of loneliness compared to a UK general population sample  
35 from the COVID-19 Social Study (26% v 39%) [39] and similar levels to another study (27%) [40]. An  
36 explanation could be that our study collected data during June to September when lockdown  
37 restrictions were less than in March to May when the other studies collected their data.  
38 Additionally, the veteran sample may have a level of protection against loneliness due to a majority  
39 being in a relationship. Of note are the findings that individuals with children under 18 years of age,  
40 and those with caring responsibilities, were more likely to report feelings of loneliness. We,  
41 therefore, see a pattern of extra pressures on those with family responsibilities, who would not have  
42 had the usual social support networks due to restrictions. The finding that key workers in health and  
43 social care were more likely to report feeling lonely compared to other key workers, highlights the  
44 extra support that healthcare key workers may need in the pandemic [41].  
45  
46  
47  
48

49 As elsewhere, boredom was common in veterans during the pandemic and was strongly associated  
50 with CMD, hazardous alcohol use and loneliness [42], and has been associated with psychological  
51 distress for individuals who reported high meaning in life [43]. With restrictions reintroduced in the  
52 Winter of 2020 and into 2021, the long-term effect of boredom on veterans' wellbeing, identity and  
53 meaning in life remains to be seen [3].  
54  
55  
56

57 Whilst CMD levels in our veteran group has not risen from pre-pandemic levels, there are still a  
58 significant minority of veterans that may need mental health treatment and support. Due to the  
59 nature of COVID-19 lockdowns and restrictions in the UK, the National Health Service and charitable  
60

1  
2  
3 providers should particularly focus on the benefits of telemedicine for veterans into the future [16,  
4 44, 45]. Our study demonstrates an impact of the pandemic on veteran families increasing their  
5 stress, relationship/caring difficulties and responsibilities. There has been success in the US  
6 promoting parenting skills for veteran families under COVID-19 pressures [46], while in the UK,  
7 resources created by King's College London and partners offer practical support for families  
8 ('Families Under Pressure') which could be utilised by veteran groups [47]. As with the general  
9 population, innovative ways are needed to tackle loneliness and improve social networks and  
10 support during the pandemic, particularly focused on those with mental health needs [48, 49].  
11  
12  
13

14  
15 The study strengths include recruitment from a cohort whose previous mental health status is  
16 known, rapid roll-out, and use of validated measures for mental health and wellbeing outcomes  
17 aligned with our previous study and other UK general population studies' measures. Study  
18 limitations include recruitment from a specific veteran cohort serving during the Iraq/Afghanistan  
19 era and therefore we cannot comment on the experiences of veterans outside of this era. The study  
20 is limited by the majority of responses arising from veterans living in England and limited to the  
21 context of the pandemic in the UK, June-September 2020.  
22  
23  
24

## 25 CONCLUSIONS

26  
27 Our study suggests a COVID-19 impact on veterans' mental health, alcohol use and loneliness,  
28 particularly for those experiencing difficulties with family or social relationships. Veterans  
29 experienced the pandemic in similar ways to the general population and in some cases may have  
30 responded in resilient ways. Whilst stable levels of CMD and reduction in alcohol use are positive,  
31 there remains a group of veterans that may need mental health and alcohol treatment services.  
32 There is a need to continue to follow up the health and wellbeing of this veteran group to assess  
33 developments longer term over the pandemic.  
34  
35  
36  
37  
38  
39  
40  
41  
42  
43  
44  
45  
46  
47  
48  
49  
50  
51  
52  
53  
54  
55  
56  
57  
58  
59  
60



## Funding Statement

This work was funded by the Office of Veterans' Affairs, Cabinet Office, UK Government (Contract Ref: CCZZ20A51).

## Competing Interests

SW is Honorary Civilian Consultant Advisor in Psychiatry for the British Army (unpaid). S.W. is affiliated to the National Institute for Health Research Health Protection Research Unit (NIHR HPRU) in Emergency Preparedness and Response at King's College London in partnership with Public Health England, in collaboration with the University of East Anglia and Newcastle University.

NTF is a trustee (unpaid) of The Warrior Programme, an independent advisor to the Independent Group Advising on the Release of Data (IGARD), a member of Independent Scientific Pandemic Insights Group on Behaviours (SPI-B) and their salary is part grant funded by the MoD.

DM is a trustee of the Forces in Mind Trust (unpaid) and is employed as the Head of Research for Combat Stress, a UK Veterans Mental Health Charity.

## Acknowledgements

We acknowledge the contribution to the framing of the protocol for this research by Dr Sharon Stevelink, Dr Daniel Leightley and Rupa Bhundia through their work with the KCL-CHECK and NHS-CHECK studies. We thank the KCMHR colleagues and the veterans who helped to shape the survey questionnaire.

## Authors' Contributions

MLS, DS, MJ, HB, DP, LH, DP, DM, SW, NTF were involved in the original concept and design of the study. NTF and SW have overseen the conduct of all aspects of the study. MLS led on the formulation of the questionnaire and associated measures, with substantial contributions from all authors in shaping the final questionnaire. DP led on online survey design, format and flow. DS led on the ethics submission with substantial contributions from all authors. MJ, HB and LH led on the design of participant materials including the participant invite and information sheet with input from all authors. MJ led on the data analysis plan and conducted the data analysis with input from all authors. MLS and DS led the writing of the research paper, with drafting and revision input from all authors. MLS, DS, MJ, HB, DP, LH, DP, DM, SW, NTF have all seen and approved the final version of this paper and accept accountability for all aspects of the work. SW and NTF secured the funding from OVA for this work.

## Data Sharing Statement

Data will be processed in accordance with the General Data Protection Regulation (GDPR) and the Data Protection Act 2018. We will not make any record-level data publicly accessible because we need to protect the confidentiality and security of the individual cohort members. You are welcome to contact us with proposals for collaborative research, which the investigators will consider on a case-by-case basis, and which will only occur as part of a legal collaborative agreement and after the collaborator has put in place the relevant research ethics, data protection, and data access approvals.

## REFERENCES

1. Hale, T., et al. *Oxford COVID-19 Government Response Tracker*. 2020.
2. Douglas, M., et al., *Mitigating the wider health effects of covid-19 pandemic response*. BMJ, 2020. **369**: p. m1557.
3. Brooks, S.K., et al., *The psychological impact of quarantine and how to reduce it: rapid review of the evidence*. The Lancet, 2020.
4. Pierce, M., et al., *Mental health before and during the COVID-19 pandemic: a longitudinal probability sample survey of the UK population*. The Lancet Psychiatry, 2020. **7**(10): p. 883-892.
5. Banks, J. and X. Xu, *The mental health effects of the first two months of lockdown and social distancing during the Covid-19 pandemic in the UK (No. W20/16)*, I.W. Papers, Editor. 2020: Institute for Fiscal Studies (IFS), London.
6. ONS, *Coronavirus and depression in adults, Great Britain: June 2020*. 2020.
7. MOD, *Annual Population Survey: UK Armed Forces Veterans residing in Great Britain, 2017*, Ministry of Defence. 2019.
8. Asmundson, G.J.G., et al., *Do pre-existing anxiety-related and mood disorders differentially impact COVID-19 stress responses and coping?* Journal of anxiety disorders, 2020. **74**: p. 102271-102271.
9. Stevelink, S.A., et al., *Mental health outcomes at the end of the British involvement in the Iraq and Afghanistan conflicts: a cohort study*. The British Journal of Psychiatry, 2018. **213**(6): p. 690-697.
10. Murphy, D. and W. Busuttil, *Understanding the needs of veterans seeking support for mental health difficulties*. 2019, British Medical Journal Publishing Group.
11. HelpforHeroes, *Wounded veterans face health worries during the Covid-19 pandemic*. 2020, Help For Heroes.
12. Wilson, G., M. Hill, and M.D. Kiernan, *Loneliness and social isolation of military veterans: systematic narrative review*. Occupational Medicine, 2018. **68**(9): p. 600-609.
13. Royal British Legion, *Loneliness and social isolation in the armed forces community*. 2018.
14. Austin, G., et al., *Soldiering on only goes so far: How a qualitative study on Veteran Loneliness in New Zealand influenced support during COVID-19 lockdown*. Journal of Military, Veteran and Family Health, 2020. **COVID-19**: p. Author's original, CO19007.
15. Nindl, B.C., et al., *Perspectives on resilience for military readiness and preparedness: Report of an international military physiology roundtable*. Journal of Science and Medicine in Sport, 2018. **21**(11): p. 1116-1124.
16. Mcfarlane, A., et al., *Impact of COVID-19 on mental health care for Veterans: Improve, adapt and overcome*. Journal of Military, Veteran and Family Health, 2020. **COVID-19**: p. Accepted version, CO19001.
17. Rona, R.J., et al., *Mental health screening in armed forces before the Iraq war and prevention of subsequent psychological morbidity: follow-up study*. bmj, 2006. **333**(7576): p. 991.
18. Hotopf, M., et al., *The health of UK military personnel who deployed to the 2003 Iraq war: a cohort study*. The lancet, 2006. **367**(9524): p. 1731-1741.
19. Fear, N.T., et al., *What are the consequences of deployment to Iraq and Afghanistan on the mental health of the UK armed forces? A cohort study*. The Lancet, 2010. **375**(9728): p. 1783-1797.
20. REDCap. [cited 2020; Available from: <https://www.project-redcap.org/>].
21. Sharp, M.-L., et al., *COVID-19: Impact on the health and wellbeing of ex-serving personnel (Veterans-CHECK) protocol paper*. medRxiv, 2020.
22. Goldberg, D.P. and B. Blackwell, *Psychiatric illness in general practice: a detailed study using a new method of case identification*. British medical journal, 1970. **2**(5707): p. 439.
23. Babor, T.F., et al., *AUDIT: The Alcohol Use Disorders Identification Test. Guidelines for use in primary care*, Geneva. World Health Organization, 2001.

- 1
- 2
- 3
- 4 24. Crawford, E.F., et al., *Diagnostic efficiency of the AUDIT-C in US veterans with military service since September 11, 2001*. Drug and Alcohol Dependence, 2013. **132**(1-2): p. 101-106.
- 5
- 6 25. Hughes, M.E., et al., *A short scale for measuring loneliness in large surveys: Results from two population-based studies*. Research on aging, 2004. **26**(6): p. 655-672.
- 7
- 8 26. StataCorp., *Stata Statistical Software: Release 16*. 2019, StataCorp LLC: College Station, TX.
- 9 27. Fancourt, D., A. Steptoe, and F. Bu, *Trajectories of depression and anxiety during enforced isolation due to COVID-19: longitudinal analyses of 36,520 adults in England*. medRxiv, 2020.
- 10
- 11 28. Niedzwiedz, C.L., et al., *Mental health and health behaviours before and during the initial phase of the COVID-19 lockdown: longitudinal analyses of the UK Household Longitudinal Study*. J Epidemiol Community Health, 2020.
- 12
- 13
- 14 29. MacManus, D., et al., *The mental health of the UK Armed Forces in the 21st century: resilience in the face of adversity*. BMJ Military Health, 2014. **160**(2): p. 125-130.
- 15
- 16 30. Mulligan, K., et al., *Psycho-educational interventions designed to prevent deployment-related psychological ill-health in Armed Forces personnel: A review*. Psychological medicine, 2011. **41**(4): p. 673.
- 17
- 18 31. Brown, S.M., et al., *Stress and parenting during the global COVID-19 pandemic*. Child abuse & neglect, 2020: p. 104699.
- 19
- 20 32. Tani, M., et al., *Working Parents, Financial Insecurity, and Child-Care: Mental Health in the Time of COVID-19*. 2020.
- 21
- 22 33. Vlachantoni, A., et al., *Social Participation and Health Outcomes Among Caregivers and Noncaregivers in Great Britain*. Journal of Applied Gerontology, 2019: p. 0733464819885528.
- 23
- 24 34. Jackson, S.E., et al., *Association of the Covid-19 lockdown with smoking, drinking, and attempts to quit in England: an analysis of 2019-2020 data*. Addiction, 2020.
- 25
- 26 35. Rhead, R., et al., *Mental Health Disorders and Alcohol Misuse Among UK Military Veterans and the General Population: A Comparison Study*. Psychological Medicine, 1-11. doi:10.1017/S0033291720001944, 2019.
- 27
- 28 36. Irizar, P., et al., *Drinking motivations in UK serving and ex-serving military personnel*. Occupational Medicine, 2020.
- 29
- 30 37. Jones, E. and N.T. Fear, *Alcohol use and misuse within the military: a review*. International review of psychiatry, 2011. **23**(2): p. 166-172.
- 31
- 32 38. Garnett, C., et al., *Factors associated with drinking behaviour during COVID-19 social distancing and lockdown among adults in the UK*. medRxiv, 2020.
- 33
- 34 39. Bu, F., A. Steptoe, and D. Fancourt, *Who is lonely in lockdown? Cross-cohort analyses of predictors of loneliness before and during the COVID-19 pandemic*. medRxiv, 2020.
- 35
- 36 40. Groarke, J.M., et al., *Loneliness in the UK during the COVID-19 pandemic: Cross-sectional results from the COVID-19 Psychological Wellbeing Study*. PloS one, 2020. **15**(9): p. e0239698.
- 37
- 38 41. Greenberg, N., et al., *Managing mental health challenges faced by healthcare workers during covid-19 pandemic*. bmj, 2020. **368**.
- 39
- 40 42. Brodeur, A., et al., *Assessing the impact of the coronavirus lockdown on unhappiness, loneliness, and boredom using Google Trends*. arXiv preprint arXiv:2004.12129, 2020.
- 41
- 42 43. Chao, M., et al., *Psychological distress and state boredom during the COVID-19 outbreak in China: the role of meaning in life and media use*. European journal of psychotraumatology, 2020. **11**(1): p. 1769379.
- 43
- 44 44. Sciarrino, N.A., U.S. Myers, and B.C. Wangelin, *When chaos is the norm: How some veterans with PTSD are continuing to engage in trauma-focused treatments during the COVID-19 pandemic*. Psychological Trauma: Theory, Research, Practice, and Policy, 2020. **12**(S1): p. S69.
- 45
- 46
- 47
- 48
- 49
- 50
- 51
- 52
- 53
- 54
- 55
- 56
- 57
- 58
- 59
- 60

- 1  
2  
3  
4  
5  
6  
7  
8  
9  
10  
11  
12  
13  
14  
15  
16  
17  
18  
19  
20  
21  
22  
23  
24  
25  
26  
27  
28  
29  
30  
31  
32  
33  
34  
35  
36  
37  
38  
39  
40  
41  
42  
43  
44  
45  
46  
47  
48  
49  
50  
51  
52  
53  
54  
55  
56  
57  
58  
59  
60
45. Ashwick, R., D. Turgoose, and D. Murphy, *Exploring the acceptability of delivering Cognitive Processing Therapy (CPT) to UK veterans with PTSD over Skype: A qualitative study*. *European Journal of Psychotraumatology*, 2019. **10**(1): p. 1573128.
  46. James Riegler, L., et al., *Pilot trial of a telepsychotherapy parenting skills intervention for veteran families: Implications for managing parenting stress during COVID-19*. *Journal of Psychotherapy Integration*, 2020. **30**(2): p. 290.
  47. Sonuga-Barke, E. *Families Under Pressure (POP-UP team)*. 2020 [cited 2020 November]; Available from: <https://maudsleycharity.org/familiesunderpressure/>.
  48. Hatch, S.L., et al., *Life in and after the Armed Forces: social networks and mental health in the UK military*. *Sociology of health & illness*, 2013. **35**(7): p. 1045-1064.
  49. Murphy, D., *Exploring the impact of Covid-19 and restrictions to daily living as a result of social distancing within veterans with pre-existing mental health difficulties*. 2020.

## Supplemental Information

**Table 1** - Comparison of social and military demographic characteristics of responders and non-responders. Column percentages. N = 3547

|                     | Responder<br>N = 1562 | Non responder<br>N = 1985 | OR (95%CI)       | AOR (95% CI)*    |
|---------------------|-----------------------|---------------------------|------------------|------------------|
| Sex                 |                       |                           |                  |                  |
| male                | 1,383(88.54%)         | 1,794(90.38%)             | 1.00             | 1.00             |
| female              | 179(11.46%)           | 191(9.62%)                | 1.22 (0.98-1.51) | 1.51 (1.21-1.90) |
| Age band            |                       |                           |                  |                  |
| 25-34               | 46(2.94%)             | 190(9.57%)                | 0.31 (0.22-0.44) | 0.34 (0.23-0.49) |
| 35-44               | 272(17.41%)           | 552(27.81%)               | 0.63 (0.53-0.76) | 0.63 (0.52-0.77) |
| 45-54               | 554(35.47%)           | 710(35.77%)               | 1.00             | 1.00             |
| 55-64               | 514(32.91%)           | 444(22.37%)               | 1.48 (1.25-1.76) | 1.51 (1.27-1.79) |
| 65 and over         | 176(11.27%)           | 89(4.48%)                 | 2.53 (1.92-3.35) | 2.56 (1.91-3.43) |
| Rank                |                       |                           |                  |                  |
| Officer             | 478(30.60%)           | 462(23.27%)               | 1.31 (1.12-1.53) | 1.02 (0.85-1.22) |
| NCO                 | 954(61.08%)           | 1,209(60.91%)             | 1.00             | 1.00             |
| Other rank          | 130(8.32%)            | 314(15.82)                | 0.52 (0.42-0.66) | 0.92 (0.71-1.19) |
| Service             |                       |                           |                  |                  |
| Royal Navy          | 290(18.57%)           | 393(19.80%)               | 1.02 (0.85-1.21) | 0.88 (0.74-1.06) |
| Army                | 873(55.89%)           | 1,201(60.50%)             | 1.00             | 1.00             |
| RAF                 | 399(25.54%)           | 391(19.70%)               | 1.40 (1.19-1.65) | 1.18 (0.99-1.40) |
| Education level     |                       |                           |                  |                  |
| No qual or O level  | 385(24.65%)           | 577(29.10%)               | 0.72 (0.61-0.85) | 0.83 (0.69-1.00) |
| A level             | 506(32.39%)           | 682(34.39%)               | 0.80 (0.69-0.94) | 0.93 (0.78-1.10) |
| degree              | 671(42.96%)           | 724(36.51%)               | 1.00             | 1.00             |
| Relationship status |                       |                           |                  |                  |
| In a relationship   | 1,337(86.82%)         | 1,679(86.24%)             | 1.00             | 1.00             |
| Single              | 90(5.84%)             | 145(7.45%)                | 0.78 (0.59-1.02) | 1.03 (0.77-1.37) |
| Ex relationship     | 113(7.34%)            | 123(6.32%)                | 1.15 (0.88-1.50) | 1.06 (0.80-1.39) |

\*adjusted for sex, age, education, service and rank

**Table 2 – Association between CMD, Hazardous alcohol consumption and Loneliness and COVID19 experiences and stressors**

|                                            | N (%)         | Common Mental Disorders (AOR 95% CI) *<br>N = 376<br>(25.97%) | Common Mental Disorders (AOR 95% CI) **<br>N = 376<br>(25.97%) | Hazardous drinking (AUDIT ≥8) (AOR 95% CI) *<br>N = 367<br>(27.82%) | Hazardous drinking (AUDIT ≥8) (AOR 95% CI) **<br>N = 367<br>(27.82%) |
|--------------------------------------------|---------------|---------------------------------------------------------------|----------------------------------------------------------------|---------------------------------------------------------------------|----------------------------------------------------------------------|
| <b>Had or have COVID-19</b>                |               |                                                               |                                                                |                                                                     |                                                                      |
| No                                         | 866 (53.80%)  | 1.00                                                          | 1.00                                                           | 1.00                                                                | 1.00                                                                 |
| Yes                                        | 226 (14.83%)  | 1.55 (1.08-2.22)                                              | 1.49 (1.02-2.16)                                               | 0.80 (0.55-1.16)                                                    | 0.68 (0.45-1.05)                                                     |
| Don't know                                 | 470 (31.37%)  | 1.06 (0.79-1.43)                                              | 1.03 (0.76-1.40)                                               | 0.78 (0.58-1.05)                                                    | 0.70 (0.50-0.98)                                                     |
| <b>Had to isolate</b>                      |               |                                                               |                                                                |                                                                     |                                                                      |
| No                                         | 1310 (83.51%) | 1.00                                                          | 1.00                                                           | 1.00                                                                |                                                                      |
| Yes                                        | 249 (16.49%)  | 1.33 (0.96-1.85)                                              | 1.24 (0.88-1.74)                                               | 0.89 (0.63-1.26)                                                    | 0.69 (0.47-1.02)                                                     |
| <b>Know someone who died from COVID-19</b> |               |                                                               |                                                                |                                                                     |                                                                      |
| No                                         | 1276 (81.52%) | 1.00                                                          |                                                                | 1.00                                                                |                                                                      |
| Yes                                        | 286 (18.48%)  | 1.76 (1.29-2.40)                                              | 1.73 (1.26-2.38)                                               | 0.95 (0.68-1.33)                                                    | 0.97 (0.66-1.43)                                                     |
| <b>Change in employment</b>                |               |                                                               |                                                                |                                                                     |                                                                      |
| no change or furlough                      | 1425 (91.60%) | 1.00                                                          |                                                                | 1.00                                                                |                                                                      |
| change for worse                           | 134 (8.40%)   | 3.14 (2.15-4.60)                                              | 3.07 (2.03-4.65)                                               | 1.26 (0.82-1.93)                                                    | 1.04 (0.64-1.71)                                                     |
| <b>Key Worker</b>                          |               |                                                               |                                                                |                                                                     |                                                                      |
| Not a key worker                           | 880 (53.72%)  | 1.42 (1.06-1.89)                                              | 1.43 (1.06-1.93)                                               | 1.09 (0.81-1.45)                                                    | 0.87 (0.63-1.22)                                                     |
| Key worker – Health and social care        | 131 (8.79%)   | 1.40 (0.85-2.31)                                              | 1.33 (0.77-2.30)                                               | 0.81 (0.47-1.38)                                                    | 0.70 (0.40-1.21)                                                     |
| Key workers - All other roles              | 543 (37.48%)  | 1.00                                                          |                                                                | 1.00                                                                | 1.00                                                                 |
| <b>Who usually live with</b>               |               |                                                               |                                                                |                                                                     |                                                                      |
| Live alone                                 | 170 (11.04%)  | 2.11 (1.07-4.16)                                              | 1.82 (0.91-3.66)                                               | 1.56 (0.82-2.96)                                                    | 1.81 (0.88-3.71)                                                     |
| Live with spouse/partner                   | 1328 (84.55%) | 1.00                                                          | 1.00                                                           | 1.00                                                                | 1.00                                                                 |
| Live with others                           | 59 (4.41%)    | 1.59 (0.55-4.60)                                              | 1.40 (0.51-3.86)                                               | 0.95 (0.35-2.59)                                                    | 1.11 (0.36-3.45)                                                     |
| <b>Children</b>                            |               |                                                               |                                                                |                                                                     |                                                                      |
| Have no children                           | 357 (24.50%)  | 1.00                                                          | 1.00                                                           | 1.00                                                                | 1.00                                                                 |
| Have children but not responsible for      | 666 (36.04%)  | 1.14 (0.78-1.67)                                              | 1.09 (0.74-1.59)                                               | 0.93 (0.64-1.36)                                                    | 1.05 (0.68-1.62)                                                     |



|                                                             | N (%)         | Common Mental Disorders (AOR 95% CI) *<br>N = 376<br>(25.97%) | Common Mental Disorders (AOR 95% CI) **<br>N = 376<br>(25.97%) | Hazardous drinking (AUDIT ≥8) (AOR 95% CI) *<br>N = 367<br>(27.82%) | Hazardous drinking (AUDIT ≥8) (AOR 95% CI) **<br>N = 367<br>(27.82%) |
|-------------------------------------------------------------|---------------|---------------------------------------------------------------|----------------------------------------------------------------|---------------------------------------------------------------------|----------------------------------------------------------------------|
| Responsible for one child under 18 years old                | 214 (15.23%)  | 0.87 (0.53-1.41)                                              | 0.88 (0.54-1.46)                                               | 0.92 (0.59-1.44)                                                    | 1.08 (0.64-1.82)                                                     |
| Responsible for two or more children under 18 years of age  | 320 (24.23%)  | 1.56 (1.03-2.37)                                              | 1.62 (1.07-2.47)                                               | 0.87 (0.57-1.33)                                                    | 1.18 (0.72-1.94)                                                     |
| <b>Changed childcare arrangements</b>                       |               |                                                               |                                                                |                                                                     |                                                                      |
| No                                                          | 243 (52.40%)  | 1.00                                                          | 1.00                                                           | 1.00                                                                |                                                                      |
| Yes                                                         | 214 (47.60%)  | 2.31 (1.47-3.64)                                              | 2.24 (1.41-3.54)                                               | 1.15 (0.73-1.84)                                                    | 1.11 (0.65-1.90)                                                     |
| <b>Impact of changed childcare arrangements</b>             |               |                                                               |                                                                |                                                                     |                                                                      |
| Positive impact                                             | 33 (14.08%)   | 0.60 (0.21-1.67)                                              | 0.72 (0.26-1.98)                                               | 1.16 (0.45-3.00)                                                    | 0.99 (0.30-3.26)                                                     |
| Negative impact                                             | 94 (44.73%)   | 1.96 (0.99-3.89)                                              | 1.91 (0.94-3.88)                                               | 1.39 (0.68-2.85)                                                    | 1.27 (0.56-2.87)                                                     |
| Neutral impact                                              | 87 (41.19%)   | 1.00                                                          | 1.00                                                           | 1.00                                                                | 1.00                                                                 |
| <b>Usual caring responsibilities (pre pandemic)</b>         |               |                                                               |                                                                |                                                                     |                                                                      |
| No                                                          | 1361 (87.55%) | 1.00                                                          | 1.00                                                           | 1.00                                                                |                                                                      |
| yes                                                         | 195 (12.45%)  | 1.74 (1.20-2.53)                                              | 1.73 (1.19-2.51)                                               | 0.79 (0.52-1.21)                                                    | 0.90 (0.55-1.48)                                                     |
| <b>Extra or new caring responsibilities during pandemic</b> |               |                                                               |                                                                |                                                                     |                                                                      |
| No                                                          | 1285 (82.10%) | 1.00                                                          |                                                                | 1.00                                                                |                                                                      |
| yes                                                         | 271 (17.90%)  | 1.77 (1.29-2.43)                                              | 1.77 (1.27-2.48)                                               | 1.01 (0.71-1.42)                                                    | 1.07 (0.71-1.60)                                                     |
| <b>Financial problems</b>                                   |               |                                                               |                                                                |                                                                     |                                                                      |
| No                                                          | 1379 (86.96%) | 1.00                                                          | 1.00                                                           | 1.00                                                                |                                                                      |
| yes                                                         | 183 (13.04%)  | 2.93 (2.06-4.15)                                              | 2.67 (1.89-3.78)                                               | 1.04 (0.69-1.57)                                                    | 0.96 (0.59-1.58)                                                     |
| <b>Had difficulty accessing enough food</b>                 |               |                                                               |                                                                |                                                                     |                                                                      |
| No                                                          | 1533 (97.9%)  | 1.00                                                          | 1.00                                                           | 1.00                                                                | 1.00                                                                 |
| Yes                                                         | 29 (2.09%)    | 3.10 (1.35-7.16)                                              | 2.27 (0.91-5.67)                                               | 1.64 (0.70-3.82)                                                    | 1.28 (0.51-3.21)                                                     |
| <b>Had difficulty accessing medication</b>                  |               |                                                               |                                                                |                                                                     |                                                                      |

|                                                            | N (%)         | Common Mental Disorders (AOR 95% CI) *<br>N = 376 (25.97%) | Common Mental Disorders (AOR 95% CI) **<br>N = 376 (25.97%) | Hazardous drinking (AUDIT ≥8) (AOR 95% CI) *<br>N = 367 (27.82%) | Hazardous drinking (AUDIT ≥8) (AOR 95% CI) **<br>N = 367 (27.82%) |
|------------------------------------------------------------|---------------|------------------------------------------------------------|-------------------------------------------------------------|------------------------------------------------------------------|-------------------------------------------------------------------|
| No                                                         | 1490 (94.86%) | 1.00                                                       | 1.00                                                        | 1.00                                                             | 1.00                                                              |
| Yes                                                        | 72 (5.14%)    | 2.32 (1.34-4.02)                                           | 1.57 (0.89-2.76-)                                           | 1.01 (0.52-1.95)                                                 | 0.82 (0.36-1.86)                                                  |
| <b>Had difficulty with health</b>                          |               |                                                            |                                                             |                                                                  |                                                                   |
| No                                                         | 1374 (87.49%) | 1.00                                                       | 1.00                                                        | 1.00                                                             | 1.00                                                              |
| Yes                                                        | 188 (12.51%)  | 6.94 (4.91-9.83)                                           | 5.47 (3.83-7.81)                                            | 1.73 (1.19-2.51)                                                 | 1.67 (1.07-2.61)                                                  |
| <b>Had somebody close in hospital</b>                      |               |                                                            |                                                             |                                                                  |                                                                   |
| No                                                         | 1460 (93.24%) | 1.00                                                       | 1.00                                                        | 1.00                                                             | 1.00                                                              |
| Yes                                                        | 102 (6.76%)   | 2.40 (1.51-3.81)                                           | 2.50 (1.54-4.05)                                            | 1.25 (0.76-2.07)                                                 | 1.10 (0.60-2.01)                                                  |
| <b>Lost somebody close</b>                                 |               |                                                            |                                                             |                                                                  |                                                                   |
| No                                                         | 1489 (94.90%) | 1.00                                                       | 1.00                                                        | 1.00                                                             | 1.00                                                              |
| Yes                                                        | 73 (5.10%)    | 1.85 (1.06-3.22)                                           | 1.55 (0.86-2.79)                                            | 0.63 (0.32-1.26)                                                 | 0.51 (0.22-1.17)                                                  |
| <b>Had to change delay or major plan</b>                   |               |                                                            |                                                             |                                                                  |                                                                   |
| No                                                         | 1198 (76.26%) | 1.00                                                       | 1.00                                                        | 1.00                                                             | 1.00                                                              |
| Yes                                                        | 364 (23.74%)  | 2.50 (1.89-3.32)                                           | 2.27 (1.69-3.06)                                            | 1.16 (0.85-1.57)                                                 | 0.97 (0.68-1.38)                                                  |
| <b>Difficulties with family/other social relationships</b> |               |                                                            |                                                             |                                                                  |                                                                   |
| No                                                         | 1284 (80.53%) | 1.00                                                       | 1.00                                                        | 1.00                                                             | 1.00                                                              |
| Yes                                                        | 278 (19.47%)  | 5.29 (3.85-7.27)                                           | 4.64 (3.33-6.46)                                            | 1.70 (1.22-2.36)                                                 | 1.56 (1.05-2.30)                                                  |
| <b>Difficulties with internet access</b>                   |               |                                                            |                                                             |                                                                  |                                                                   |
| No                                                         | 1455 (92.95%) | 1.00                                                       | 1.00                                                        | 1.00                                                             | 1.00                                                              |
| Yes                                                        | 107 (7.05%)   | 1.84 (1.17-2.88)                                           | 1.88 (1.18-3.00)                                            | 1.06 (0.65-1.72)                                                 | 1.31 (0.75-2.26)                                                  |
| <b>Work difficulties</b>                                   |               |                                                            |                                                             |                                                                  |                                                                   |
| No                                                         | 1293 (81.03%) | 1.00                                                       | 1.00                                                        | 1.00                                                             | 1.00                                                              |



|                               | N (%)         | Common Mental Disorders (AOR 95% CI) *<br>N = 376 (25.97%) | Common Mental Disorders (AOR 95% CI) **<br>N = 376 (25.97%) | Hazardous drinking (AUDIT ≥8) (AOR 95% CI) *<br>N = 367 (27.82%) | Hazardous drinking (AUDIT ≥8) (AOR 95% CI) **<br>N = 367 (27.82%) |
|-------------------------------|---------------|------------------------------------------------------------|-------------------------------------------------------------|------------------------------------------------------------------|-------------------------------------------------------------------|
| Yes                           | 269 (18.97%)  | 4.12 (3.01-5.65)                                           | 3.68 (2.64-5.14)                                            | 1.39 (1.00-1.94)                                                 | 1.40 (0.94-2.09)                                                  |
| <b>Difficulties with pets</b> |               |                                                            |                                                             |                                                                  |                                                                   |
| No                            | 1522 (97.46%) | 1.00                                                       | 1.00                                                        | 1.00                                                             | 1.00                                                              |
| Yes                           | 40 (2.54%)    | 2.79 (1.44-5.41)                                           | 2.52 (1.25-5.06)                                            | 0.90 (0.40-2.05)                                                 | 0.88 (0.36-2.17)                                                  |
| <b>Boredom</b>                |               |                                                            |                                                             |                                                                  |                                                                   |
| No                            | 1210 (75.06%) | 1.00                                                       | 1.00                                                        | 1.00                                                             | 1.00                                                              |
| Yes                           | 352 (24.94%)  | 2.88 (2.15-3.85)                                           | 2.69 (1.98-3.65-)                                           | 1.75 (1.28-2.39)                                                 | 1.55 (1.09-2.20)                                                  |

\* Adjusted for sex, age, education, marital status, rank, service

\*\* Adjusted for sex, age, education, marital status, rank, service and phase 3 GHQ or AUDIT-8 as appropriate

STROBE Statement—Checklist of items that should be included in reports of *cohort studies*

|                              | Item No | Recommendation                                                                                                                                                                                                                                                                                                         | Page No |
|------------------------------|---------|------------------------------------------------------------------------------------------------------------------------------------------------------------------------------------------------------------------------------------------------------------------------------------------------------------------------|---------|
| <b>Title and abstract</b>    | 1       | (a) Indicate the study's design with a commonly used term in the title or the abstract<br>(b) Provide in the abstract an informative and balanced summary of what was done and what was found                                                                                                                          | 1-2     |
| <b>Introduction</b>          |         |                                                                                                                                                                                                                                                                                                                        |         |
| Background/rationale         | 2       | Explain the scientific background and rationale for the investigation being reported                                                                                                                                                                                                                                   | 3       |
| Objectives                   | 3       | State specific objectives, including any prespecified hypotheses                                                                                                                                                                                                                                                       | 3       |
| <b>Methods</b>               |         |                                                                                                                                                                                                                                                                                                                        |         |
| Study design                 | 4       | Present key elements of study design early in the paper                                                                                                                                                                                                                                                                | 4       |
| Setting                      | 5       | Describe the setting, locations, and relevant dates, including periods of recruitment, exposure, follow-up, and data collection                                                                                                                                                                                        | 4-5     |
| Participants                 | 6       | (a) Give the eligibility criteria, and the sources and methods of selection of participants. Describe methods of follow-up<br>(b) For matched studies, give matching criteria and number of exposed and unexposed                                                                                                      | 4-5     |
| Variables                    | 7       | Clearly define all outcomes, exposures, predictors, potential confounders, and effect modifiers. Give diagnostic criteria, if applicable                                                                                                                                                                               | 4-5     |
| Data sources/<br>measurement | 8*      | For each variable of interest, give sources of data and details of methods of assessment (measurement). Describe comparability of assessment methods if there is more than one group                                                                                                                                   | 4-5     |
| Bias                         | 9       | Describe any efforts to address potential sources of bias                                                                                                                                                                                                                                                              | 5       |
| Study size                   | 10      | Explain how the study size was arrived at                                                                                                                                                                                                                                                                              | 4       |
| Quantitative variables       | 11      | Explain how quantitative variables were handled in the analyses. If applicable, describe which groupings were chosen and why                                                                                                                                                                                           | 5       |
| Statistical methods          | 12      | (a) Describe all statistical methods, including those used to control for confounding<br>(b) Describe any methods used to examine subgroups and interactions<br>(c) Explain how missing data were addressed<br>(d) If applicable, explain how loss to follow-up was addressed<br>(e) Describe any sensitivity analyses | 5       |
| <b>Results</b>               |         |                                                                                                                                                                                                                                                                                                                        |         |
| Participants                 | 13*     | (a) Report numbers of individuals at each stage of study—eg numbers potentially eligible, examined for eligibility, confirmed eligible, included in the study, completing follow-up, and analysed<br>(b) Give reasons for non-participation at each stage<br>(c) Consider use of a flow diagram                        | 5       |
| Descriptive data             | 14*     | (a) Give characteristics of study participants (eg demographic, clinical, social) and information on exposures and potential confounders<br>(b) Indicate number of participants with missing data for each variable of interest<br>(c) Summarise follow-up time (eg, average and total amount)                         | 5-6     |
| Outcome data                 | 15*     | Report numbers of outcome events or summary measures over time                                                                                                                                                                                                                                                         | 6-7     |

|    |                          |                                                                                                                  |                                                                                                                                                                                                              |       |
|----|--------------------------|------------------------------------------------------------------------------------------------------------------|--------------------------------------------------------------------------------------------------------------------------------------------------------------------------------------------------------------|-------|
| 1  | Main results             | 16                                                                                                               | (a) Give unadjusted estimates and, if applicable, confounder-adjusted estimates and their precision (eg, 95% confidence interval). Make clear which confounders were adjusted for and why they were included | 6-10  |
| 2  |                          | (b) Report category boundaries when continuous variables were categorized                                        |                                                                                                                                                                                                              |       |
| 3  |                          | (c) If relevant, consider translating estimates of relative risk into absolute risk for a meaningful time period |                                                                                                                                                                                                              |       |
| 4  | Other analyses           | 17                                                                                                               | Report other analyses done—eg analyses of subgroups and interactions, and sensitivity analyses                                                                                                               | 10    |
| 5  | <b>Discussion</b>        |                                                                                                                  |                                                                                                                                                                                                              |       |
| 6  | Key results              | 18                                                                                                               | Summarise key results with reference to study objectives                                                                                                                                                     | 11    |
| 7  | Limitations              | 19                                                                                                               | Discuss limitations of the study, taking into account sources of potential bias or imprecision. Discuss both direction and magnitude of any potential bias                                                   | 13    |
| 8  | Interpretation           | 20                                                                                                               | Give a cautious overall interpretation of results considering objectives, limitations, multiplicity of analyses, results from similar studies, and other relevant evidence                                   | 11-12 |
| 9  | Generalisability         | 21                                                                                                               | Discuss the generalisability (external validity) of the study results                                                                                                                                        | 13    |
| 10 | <b>Other information</b> |                                                                                                                  |                                                                                                                                                                                                              |       |
| 11 | Funding                  | 22                                                                                                               | Give the source of funding and the role of the funders for the present study and, if applicable, for the original study on which the present article is based                                                | 14    |

\*Give information separately for exposed and unexposed groups.

**Note:** An Explanation and Elaboration article discusses each checklist item and gives methodological background and published examples of transparent reporting. The STROBE checklist is best used in conjunction with this article (freely available on the Web sites of PLoS Medicine at <http://www.plosmedicine.org/>, Annals of Internal Medicine at <http://www.annals.org/>, and Epidemiology at <http://www.epidem.com/>). Information on the STROBE Initiative is available at <http://www.strobe-statement.org>.

# BMJ Open

## UK Veterans' mental health and wellbeing before and during the COVID-19 pandemic: A longitudinal cohort study

|                                 |                                                                                                                                                                                                                                                                                                                                                                                                                                                                                                                                                                                                                                                                                                                                                   |
|---------------------------------|---------------------------------------------------------------------------------------------------------------------------------------------------------------------------------------------------------------------------------------------------------------------------------------------------------------------------------------------------------------------------------------------------------------------------------------------------------------------------------------------------------------------------------------------------------------------------------------------------------------------------------------------------------------------------------------------------------------------------------------------------|
| Journal:                        | <i>BMJ Open</i>                                                                                                                                                                                                                                                                                                                                                                                                                                                                                                                                                                                                                                                                                                                                   |
| Manuscript ID                   | bmjopen-2021-049815.R1                                                                                                                                                                                                                                                                                                                                                                                                                                                                                                                                                                                                                                                                                                                            |
| Article Type:                   | Original research                                                                                                                                                                                                                                                                                                                                                                                                                                                                                                                                                                                                                                                                                                                                 |
| Date Submitted by the Author:   | 19-May-2021                                                                                                                                                                                                                                                                                                                                                                                                                                                                                                                                                                                                                                                                                                                                       |
| Complete List of Authors:       | Sharp, Marie-Louise; King's College London, Psychological Medicine<br>Serfioti, Danai; King's College London, Psychological Medicine<br>Jones, Margaret; King's College London, Psychological Medicine<br>Burdett, Howard; King's College London, Psychological Medicine<br>Pernet, David; King's College London, Psychological Medicine<br>Hull, Lisa; King's College London, Psychological Medicine<br>Murphy, Dominic; King's College London, Psychological Medicine;<br>Combat Stress<br>Wessely, Simon; King's College London, Psychological Medicine<br>Fear, Nicola; King's College London, Psychological Medicine; King's<br>Centre for Military Health Research Academic Department of Military<br>Mental Health, Psychological Medicine |
| <b>Primary Subject Heading</b>: | Epidemiology                                                                                                                                                                                                                                                                                                                                                                                                                                                                                                                                                                                                                                                                                                                                      |
| Secondary Subject Heading:      | Mental health, Occupational and environmental medicine                                                                                                                                                                                                                                                                                                                                                                                                                                                                                                                                                                                                                                                                                            |
| Keywords:                       | COVID-19, EPIDEMIOLOGY, MENTAL HEALTH                                                                                                                                                                                                                                                                                                                                                                                                                                                                                                                                                                                                                                                                                                             |
|                                 |                                                                                                                                                                                                                                                                                                                                                                                                                                                                                                                                                                                                                                                                                                                                                   |

SCHOLARONE™  
Manuscripts

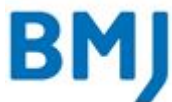

I, the Submitting Author has the right to grant and does grant on behalf of all authors of the Work (as defined in the below author licence), an exclusive licence and/or a non-exclusive licence for contributions from authors who are: i) UK Crown employees; ii) where BMJ has agreed a CC-BY licence shall apply, and/or iii) in accordance with the terms applicable for US Federal Government officers or employees acting as part of their official duties; on a worldwide, perpetual, irrevocable, royalty-free basis to BMJ Publishing Group Ltd ("BMJ") its licensees and where the relevant Journal is co-owned by BMJ to the co-owners of the Journal, to publish the Work in this journal and any other BMJ products and to exploit all rights, as set out in our [licence](#).

The Submitting Author accepts and understands that any supply made under these terms is made by BMJ to the Submitting Author unless you are acting as an employee on behalf of your employer or a postgraduate student of an affiliated institution which is paying any applicable article publishing charge ("APC") for Open Access articles. Where the Submitting Author wishes to make the Work available on an Open Access basis (and intends to pay the relevant APC), the terms of reuse of such Open Access shall be governed by a Creative Commons licence – details of these licences and which [Creative Commons](#) licence will apply to this Work are set out in our licence referred to above.

Other than as permitted in any relevant BMJ Author's Self Archiving Policies, I confirm this Work has not been accepted for publication elsewhere, is not being considered for publication elsewhere and does not duplicate material already published. I confirm all authors consent to publication of this Work and authorise the granting of this licence.

# UK Veterans' mental health and wellbeing before and during the COVID-19 pandemic: A longitudinal cohort study

Marie-Louise Sharp\*: King's Centre for Military Health Research, Department of Psychological Medicine, King's College London, Weston Education Centre, 10 Cutcombe Road, London, UK  
Correspondence: [marie-louise.sharp@kcl.ac.uk](mailto:marie-louise.sharp@kcl.ac.uk)

Danai Serfioti\*: King's Centre for Military Health Research, Department of Psychological Medicine, King's College London, London, UK.

Margaret Jones: King's Centre for Military Health Research, Department of Psychological Medicine, King's College London, London, UK.

Howard Burdett: King's Centre for Military Health Research, Department of Psychological Medicine, King's College London, London, UK.

David Pernet: King's Centre for Military Health Research, Department of Psychological Medicine, King's College London, London, UK.

Lisa Hull: King's Centre for Military Health Research, Department of Psychological Medicine, King's College London, London, UK.

Dominic Murphy: King's Centre for Military Health Research, Department of Psychological Medicine, King's College London, London; Combat Stress, Research Department, Tyrwhitt House, Leatherhead, Surrey, UK.

Simon Wessely: King's Centre for Military Health Research, Department of Psychological Medicine, King's College London, London, UK.

Nicola T Fear: Academic Department of Military Mental Health and King's Centre for Military Health Research, Department of Psychological Medicine, King's College London, London, UK.

\*Joint First Authors

Word Count: 3835

## ABSTRACT

**Objectives:** To investigate the impact of the COVID-19 pandemic on the health and wellbeing of UK ex-service personnel (veterans) before and during the pandemic, and to assess associations of COVID-19 experiences and stressors with mental health, alcohol use and loneliness.

**Design:** An additional wave of data was collected from a longitudinal cohort study of the UK Armed Forces.

**Setting:** Online survey June-September 2020

**Participants:** Cohort members were included if they had completed a questionnaire at phase three of the KCMHR health and wellbeing study (2014-2016), had left the Armed Forces after Regular service, were living in the UK, had consented to follow up, and provided a valid email address. Invitation emails were sent to N=3547 with a 44% response rate (n=1562).

**Primary outcome measures:** Common mental health disorders (CMD) (measured using the General Health Questionnaire, 12 items – cut off  $\geq 4$ ), hazardous alcohol use (measured using the AUDIT, 10 items – cut off  $\geq 8$ ) and loneliness (UCLA-3 loneliness scale – cut off  $\geq 6$ ).

**Results:** Veterans reported a statistically significant decrease in hazardous drinking of 48.5% to 27.6%, whilst CMD remained stable (non-statistically significant increase of 24.5% to 26.1%). 27.4% of veterans reported feelings of loneliness. The COVID-19 stressors of reporting difficulties with family/social relationships, boredom, and difficulties with health, were statistically significantly associated with CMD, hazardous drinking and loneliness, even after adjustment for previous mental health/hazardous alcohol use.

**Conclusions:** Our study suggests a COVID-19 impact on veterans' mental health, alcohol use and loneliness, particularly for those experiencing difficulties with family relationships. Veterans experienced the pandemic in similar ways to the general population and in some cases may have responded in resilient ways. Whilst stable levels of CMD and reduction in alcohol use are positive, there remains a group of veterans that may need mental health and alcohol treatment services.

## Strengths and Limitations of this Study

- Recruitment from a longitudinal cohort study where underlying characteristics are known.
- Rapid roll-out and use of validated measures for mental health and wellbeing outcomes aligned with our previous health and wellbeing study and other UK general population studies' measures.
- Only generalisable to veterans who were in military service during the Iraq/Afghanistan era.
- The study is limited to the context of the COVID-19 pandemic in the UK, June-September 2020.

## INTRODUCTION

The COVID-19 pandemic has led to large-scale societal changes all over the world, with governments implementing strict controls on movement and substantial restrictions to people's personal and work lives [1]. Despite the benefits to public health of containment strategies such as 'lockdown', self-isolation and social distancing (e.g., slower spread of infection), the social, economic, wellbeing and health consequences are likely to be profound [2, 3] and felt in the short, medium and long term.

The uncertainty and unpredictable nature of the COVID-19 pandemic has had a general negative impact on psychological and mental health [4]. The impact of COVID-19 is not uniform. Vulnerable groups, such as the elderly, young, females, people with mental or physical ill health or on low income are at greater risk of social isolation and worse health outcomes [2]. The analysis of longitudinal data from the UK Household Longitudinal Study (UKHLS), also known as 'Understanding Society' study indicated that mental health in the UK worsened substantially from prior wave 9 data collected January 2017-May 2019 with increased GHQ scores of 10.8% on average in April 2020, and worse scores in wave 9 data for individuals with pre-existing mental health difficulties [5]. Longitudinal data from the Office for National Statistics (ONS) also reports that there has been a deterioration in mental health of the general population in Great Britain with 19.2% of adults reporting depression in June 2020 compared to 9.7% before the pandemic July 2019-March 2020 [6].

In Great Britain, there are an estimated 2.4 million ex-Service personnel (veterans) making up 5% of household residents aged 16 years and over [7]. It is currently unknown how UK veterans may experience the pandemic and the consequent effect on their health and wellbeing. Individuals with anxiety related disorders (e.g., anxiety or post-traumatic stress disorder (PTSD)) appear to be at higher risk of experiencing psychological distress during the ongoing pandemic [8]. A proportion of the veteran population show increased risk of mental and physical health issues and barriers to help-seeking [9, 10], and there has been some evidence of an increase in the number of wounded veterans who have struggled with their mental and physical health since the start of lockdown in the UK [11]. Loneliness and social isolation are recognised problems for society in general, but ex-Service personnel present with unique experiences of loneliness and social isolation, which for some can be linked to their poor re-integration into civilian life and the community [12, 13]. A study exploring how New Zealand veterans conceptualised loneliness during COVID-19 lockdown indicated that both social and physical isolation and health-related factors were significant drivers of loneliness [14]. However, in contrast to the general population (excluding emergency responders), military personnel are trained to demonstrate readiness and resilience in the face of warfare operations and stressful environments [15]. Therefore, it is unknown whether veteran's military training may also create resilient responses in the face of COVID-19 uncertainties compared to the general population.

The circumstances created by the COVID-19 pandemic may require a reconsideration of how healthcare and systems of support should be adapted to effectively accommodate the needs of the ex-Service population, especially the most vulnerable within this population [16]. The current study (Veterans-CHECK) aims to investigate the impact of the COVID-19 pandemic on the health and wellbeing of UK veterans, assessing mental health and alcohol use before and during the pandemic.



1  
2  
3 It will measure veterans reports of loneliness during the pandemic and it will also assess the impact  
4 of COVID-19 experiences and stressors on mental health, hazardous alcohol use and loneliness  
5 outcomes. Understanding this impact will be important to the Government, Armed Forces charities,  
6 and other stakeholders to target services and support and ensure current policy initiatives are fit for  
7 purpose in the context of the pandemic.  
8  
9

## 10 11 METHOD

### 12 13 Study design and participants

14  
15 Participants were recruited from the Kings Centre for Military Health Research (KCMHR) health and  
16 wellbeing survey. This is a large-scale ongoing investigation of the physical and mental health and  
17 wellbeing of UK Armed Forces personnel from all three services (regulars and reservists) and  
18 includes personnel who were first surveyed before the recent conflicts in Iraq [17], as well as during  
19 and after the conflicts in Iraq and Afghanistan. There have been three phases of data collection,  
20 Phase 1: 2004 - 2006, Phase 2: 2007 - 2009 and Phase 3: 2014 - 2016 [9, 18, 19]. Approximately  
21 18,000 have taken part in the survey since it began. Individuals were invited to take part in the  
22 Veterans-CHECK study if: they had completed a questionnaire at Phase 3 of the health and wellbeing  
23 study, had left the UK Armed Forces, had regular service, were living in the UK, had consented to  
24 follow up and provided a valid email address. Invitation emails were sent to N=3547 of individuals  
25 who met this eligibility criteria.  
26  
27  
28  
29  
30

### 31 32 Procedure

33  
34 Data collection was conducted online. Participants were asked to complete a questionnaire in their  
35 personal settings through REDCap, a secure web application for building and managing online  
36 surveys and databases [20]. Consents were completed online on the REDCap platform. The  
37 questionnaire had sections including (a) socio-demographics (b) COVID-19 experiences and stressors  
38 (c) current mental health and wellbeing measures. A full description of the study protocol is  
39 available on line Sharp, Serfioti [21].  
40  
41

42  
43 The COVID-19 experiences and stressors section included self-report of having COVID-19 (those who  
44 indicated a positive PCR test or reported they had 'probably' had COVID-19 were counted as having  
45 COVID-19 for analysis purposes), experiencing isolation, bereavement and other challenges, such as  
46 childcare arrangements and caring responsibilities during the pandemic. Participants were asked  
47 about employment changes since the start of the pandemic with two categories created of 'no  
48 change/furlough' and 'change for worse' which included those that reported unemployment,  
49 redundancy or reductions in salary. Individuals were asked whether they had experienced COVID-19  
50 stressors in the past month, followed by a list of stressors they could endorse pertaining to finances,  
51 health and other difficulties. Education and military background information were taken from Phase  
52 3 of the cohort study [9] (rank, service branch, length of service). A variable of 'financial difficulties'  
53 was constructed using three items from the list of COVID-19 stressors. Experiencing at least one of  
54 'Another bill-payer in your household lost their job or was unable to earn money', 'Unable to pay  
55 bills', 'other financial difficulties' was categorised as experiencing 'financial difficulties'. Symptoms of  
56 common mental health disorders (CMD) were measured using the 12-item General Health  
57 Questionnaire (GHQ-12), cut-off scores for case status used were 4 or more (scores range from 0 to  
58  
59  
60

12) [22]; 10-item Alcohol Use Disorder Identification Test (AUDIT) was used to measure alcohol use, cut off scores of 8 or more were used for hazardous drinking (scores range from 0 to 40), and 16 or more defined as alcohol misuse (which is likely to be harmful to health) [23], AUDIT-C score of 5 or more indicating risky drinking [24]; and the 3-item UCLA Loneliness Scale to measure feelings of loneliness with a cut off of 6 or more (scores range from 3 to 9 [25]).

## Data Collection

One invitation email was sent to participants in June 2020 with up to three email reminders sent in June, July and August 2020, with data collection closing at the end of September 2020.

## Analyses

Response weights were generated to account for non-response and defined as the inverse probability of responding once sampled, driven by covariates shown empirically to predict response. The sociodemographic and military characteristics of the sample were described. Mental health and alcohol use during COVID-19 were compared with previous mental health and alcohol use from phase three of our health and wellbeing survey [9]. Logistic regression analyses were conducted to assess the associations between the outcomes of interest (CMD, hazardous drinking and loneliness) and COVID-19 experiences and stressors. Logistic regression analyses were adjusted for sex, age, education, marital status, rank and service. Further analyses were adjusted additionally for previous CMD or hazardous drinking status at phase three of our health and wellbeing study. All statistical analyses were performed using the statistical package, Stata (version 16.0 [26]), with survey commands used to account for weighting. Weighted percentages and odds ratios are presented in tables to account for response weights, together with unweighted cell counts.

## Ethical Approval

Full ethical approval was obtained from the King's College London Research Ethics Committee (Ref: HR-19/20-18626).

## Patient and public involvement

Veterans who sit on our research board provided feedback on the content and flow of the questionnaire; the questionnaire was amended and refined accordingly. Findings from the study will be disseminated to study participants through a newsletter, social media outlets and our stakeholders that represent veteran communities.

## RESULTS

The response rate was 44% (1562/3547). Responders were more likely to be older, officers, of higher educational status, have served in the RAF, were less likely to have reported alcohol misuse, but more likely to have reported multiple physical symptoms, and poor/fair health at phase 3 of the cohort (Supplemental Information Table 1). Table 1 describes the socio-demographic and military characteristics of those who participated in the study. The majority of participants were male, Non-Commissioned Officers (NCO), had served in the Army, were educated to A-Level or degree level and

in a relationship. Over half the sample had left service 10 or more years ago and the majority were in employment before the pandemic. The majority of respondents lived in England (85.8%, n=1334).

**Table 1 – Socio-demographic and military characteristics of sample (N=1562)**

\*percentages are weighted with unweighted cell counts

| Characteristic                                                   | n (%) *       |
|------------------------------------------------------------------|---------------|
| <b>Sex</b>                                                       |               |
| male                                                             | 1383 (89.26%) |
| female                                                           | 179 (10.74%)  |
| <b>Age band (years at completion of Veterans-CHECK survey)</b>   |               |
| 25-34                                                            | 46 (6.65%)    |
| 35-44                                                            | 272 (22.97%)  |
| 45-54                                                            | 554 (35.93%)  |
| 55-64                                                            | 514 (26.95%)  |
| 65 and over                                                      | 176 (7.50%)   |
| <b>Rank (when in service)</b>                                    |               |
| Officer                                                          | 478 (26.11%)  |
| NCO                                                              | 954 (61.45%)  |
| Other rank                                                       | 130 (12.44%)  |
| <b>Service (when in service)</b>                                 |               |
| Royal Navy                                                       | 290 (19.27%)  |
| Army                                                             | 873 (58.26%)  |
| RAF                                                              | 399 (22.47%)  |
| <b>Length of time since leaving service</b>                      |               |
| Within last year                                                 | 20 (1.28%)    |
| One year up to five years                                        | 166 (12.62%)  |
| Five years up to 10 years                                        | 506 (33.86%)  |
| More than 10 years                                               | 870 (52.24%)  |
| <b>Education level (reported at Phase 3 of the cohort study)</b> |               |
| No qualifications/O-levels/GCSEs                                 | 385 (27.23%)  |
| A-level                                                          | 506 (33.91%)  |
| Degree                                                           | 671 (38.86%)  |
| <b>Relationship status (current)</b>                             |               |
| In a relationship                                                | 1361 (86.76%) |
| Single                                                           | 72 (5.67%)    |
| Ex-relationship (separated, divorced, widowed)                   | 127 (7.57%)   |
| <b>Employment status (before the COVID-19 pandemic)</b>          |               |
| Employed                                                         | 1246 (83.41%) |
| Retired                                                          | 232 (11.18%)  |
| Economically inactive                                            | 78 (5.41%)    |

## Before and during COVID-19 pandemic - mental health and alcohol use

Overall, the percentage of participants meeting the threshold for CMD remained stable from pre-pandemic levels, increasing only slightly from 24.5% (n=354) to 26.1% (n=376), where this increase was not statistically significant (Table 2). All measures of alcohol use were statistically significant reductions from pre-pandemic levels. Veterans reported hazardous drinking reductions from 48.5% (n=642) to 27.6% (n=367), alcohol misuse reductions of 9.2% (n=119) to 3.7% (n=50) and high-risk consumption reductions of 73.0% (n=987) to 49.2% (n=649). In further analysis (available upon request) women veterans in the sample reported similar trends as male veterans mirroring the stability in CMD levels and statistically significant reductions in alcohol use.

**Table 2 – Pre and during pandemic mental health and alcohol use outcomes**

\*percentages are weighted

|                                                     | <b>Before COVID-19</b><br>Phase 3<br>(2014-2016)<br>N (%)* | <b>During COVID-19</b><br>Vet-CHECK<br>(June-Sept 2020)<br>N (%) | P value** |
|-----------------------------------------------------|------------------------------------------------------------|------------------------------------------------------------------|-----------|
| <b>Common Mental Disorders</b><br>(GHQ-12 $\geq$ 4) | 354 /1539 (24.50%)                                         | 373/1539 (26.10%)                                                | 0.276     |
| <b>Hazardous Drinking</b><br>(AUDIT Case 8 $\geq$ ) | 642/1387 (48.48%)                                          | 360/1387 (27.61%)                                                | <0.0001   |
| <b>Alcohol Misuse</b><br>(AUDIT Case 16 $\geq$ )    | 119/1387 (9.19%)                                           | 48/1387 (3.71%)                                                  | <0.0001   |
| <b>Alcohol Consumption</b><br>AUDIT-C ( $\geq$ 5)   | 987/1366 (73.01%)                                          | 649/1366 (49.24%)                                                | <0.0001   |

\*\*Adjusted Wald test

## Loneliness, COVID-19 experiences and stressors

27.4% (n=395) of the sample reported feelings of loneliness. Tables 3 and 4 describe COVID-19 experiences and stressors. 14.8% (n=226) of the sample reported definitely or probably having COVID-19, with 16.5% (n=249) of the sample having to self-isolate. 18.5% (n=286) of the sample knew someone who died from COVID-19. The large majority of the sample had no change in employment or were furloughed (91.6%, n=1425). Just under half of the sample reported being key workers (46.2%, n=674), with 19% (n=131) of these key workers being health and social care key workers.

The large majority of the sample lived with their spouse/partner (84.6%, n=1328). Just under a quarter of the sample were responsible for two or more children under the age of 18 years old (24.2%, n=320). Just under half of those who had children they were responsible for had to change childcare arrangements because of the pandemic (47.6%, n=214) and 44.7% (n=94) reported the change in childcare arrangements had a negative impact on their life. 17.9% (n=271) reported extra or new caring responsibilities because of the pandemic. The most frequently reported COVID-19 stressors were boredom (24.9%, n=352), having to change or delay major plans (23.7%, n=364) and difficulties with family/other social relationships (19.5%, n=278).

## Association of mental health outcomes and COVID-19 experiences and stressors

Table 3 and 4 presents odds ratios (AOR) for the association between CMD symptoms, hazardous drinking and loneliness adjusted for sex, age, education, marital status, rank and Service.

### *Common Mental Disorders*

Increased odds of reporting symptoms of CMD was associated with self-report of definitely or probably having COVID-19, knowing someone who died from COVID-19, reporting a change for worse in employment during the pandemic (compared to no change/furlough), not being a key worker, living alone, being responsible for two or more children under 18 years of age (compared to no children), having to change childcare arrangements because of the pandemic, having usual caring responsibilities (compared to none) or extra/new caring responsibilities because of the pandemic (Table 3). Increased odds of reporting CMD were associated with all COVID-19 stressors (Table 4). The stressors with the largest effect sizes included having difficulties with health, difficulties with family/other social relationships, work difficulties, and having financial problems.

### *Hazardous Drinking*

Increased likelihood of reporting drinking at hazardous levels was associated with having difficulties with health, difficulties with family/other social relationships, and experiencing boredom.

### *Loneliness*

Increased reporting of loneliness was associated with knowing someone who died from COVID-19, being a health and social care key worker (compared to other key workers), living alone, being responsible for one or two or more children (compared to none), and having usual caring responsibilities (compared to none) (Table 3). Increased reporting of loneliness was associated with several COVID-19 stressors (Table 4), the largest effect sizes were reporting difficulties with family/other social relationships, difficulties with health, and experiencing boredom.

**Table 3 – Association between CMD, Hazardous drinking and Loneliness and COVID-19 experiences** (Weighted percentages and odds ratios are presented in tables to account for response weights, together with unweighted cell counts.)

\* Adjusted for sex, age, education, marital status, rank, service

| COVID-19 Experiences        | n (%)        | Common Mental Disorders (CMD) (AOR 95% CI) * | Hazardous drinking (AUDIT ≥8) (AOR 95% CI) * | Loneliness (AOR 95% CI) *<br>N = 395<br>(27.42%) |
|-----------------------------|--------------|----------------------------------------------|----------------------------------------------|--------------------------------------------------|
| <b>Had or have COVID-19</b> |              |                                              |                                              |                                                  |
| No                          | 866 (53.80%) | 1.00                                         | 1.00                                         | 1.00                                             |
| Yes (definitely/probably)   | 226 (14.83%) | 1.55 (1.08-2.22)                             | 0.80 (0.55-1.16)                             | 1.36 (0.96-1.95)                                 |

|                                                             |               |                  |                  |                  |
|-------------------------------------------------------------|---------------|------------------|------------------|------------------|
| Don't know                                                  | 470 (31.37%)  | 1.06 (0.79-1.43) | 0.78 (0.58-1.05) | 1.24 (0.93-1.66) |
| <b>Had to isolate</b>                                       |               |                  |                  |                  |
| No                                                          | 1310 (83.51%) | 1.00             | 1.00             |                  |
| Yes                                                         | 249 (16.49%)  | 1.33 (0.96-1.85) | 0.89 (0.63-1.26) | 1.29 (0.93-1.79) |
| <b>Know someone who died from COVID-19?</b>                 |               |                  |                  |                  |
| No                                                          | 1276 (81.52%) | 1.00             | 1.00             | 1.00             |
| Yes                                                         | 286 (18.48%)  | 1.76 (1.29-2.40) | 0.95 (0.68-1.33) | 1.54 (1.13-2.12) |
| <b>Change in employment</b>                                 |               |                  |                  |                  |
| no change or furlough                                       | 1425 (91.60%) | 1.00             | 1.00             | 1.00             |
| change for worse                                            | 134 (8.40%)   | 3.14 (2.15-4.60) | 1.26 (0.82-1.93) | 1.49 (0.98-2.29) |
| <b>Key Worker</b>                                           |               |                  |                  |                  |
| Not a key worker                                            | 880 (53.72%)  | 1.42 (1.06-1.89) | 1.09 (0.81-1.45) | 1.23 (0.92-1.65) |
| Key worker – Health and social care                         | 131 (8.79%)   | 1.40 (0.85-2.31) | 0.81 (0.47-1.38) | 1.69 (1.05-2.70) |
| Key workers - All other roles                               | 543 (37.48%)  | 1.00             | 1.00             | 1.00             |
| <b>Who usually live with</b>                                |               |                  |                  |                  |
| Live alone                                                  | 170 (11.04%)  | 2.11 (1.07-4.16) | 1.56 (0.82-2.96) | 2.49 (1.36-4.57) |
| Live with spouse/partner                                    | 1328 (84.55%) | 1.00             | 1.00             | 1.00             |
| Live with others                                            | 59 (4.41%)    | 1.59 (0.55-4.60) | 0.95 (0.35-2.59) | 1.60 (0.71-3.61) |
| <b>Children</b>                                             |               |                  |                  |                  |
| Have no children                                            | 357 (24.50%)  | 1.00             | 1.00             | 1.00             |
| Have children but not responsible for them                  | 666 (36.04%)  | 1.14 (0.78-1.67) | 0.93 (0.64-1.36) | 1.17 (0.79-1.73) |
| Responsible for one child under 18 years old                | 214 (15.23%)  | 0.87 (0.53-1.41) | 0.92 (0.59-1.44) | 1.62 (1.03-2.55) |
| Responsible for two or more children under 18 years of age  | 320 (24.23%)  | 1.56 (1.03-2.37) | 0.87 (0.57-1.33) | 1.94 (1.26-3.00) |
| <b>Changed childcare arrangements</b>                       |               |                  |                  |                  |
| No                                                          | 243 (52.40%)  | 1.00             | 1.00             | 1.00             |
| Yes                                                         | 214 (47.60%)  | 2.31 (1.47-3.64) | 1.15 (0.73-1.84) | 1.00 (0.63-1.57) |
| <b>Impact of changed childcare arrangements</b>             |               |                  |                  |                  |
| Positive impact                                             | 33 (14.08%)   | 0.60 (0.21-1.67) | 1.16 (0.45-3.00) | 0.59 (0.18-1.93) |
| Negative impact                                             | 94 (44.73%)   | 1.96 (0.99-3.89) | 1.39 (0.68-2.85) | 1.66 (0.78-3.52) |
| Neutral impact                                              | 87 (41.19%)   | 1.00             | 1.00             | 1.00             |
| <b>Usual caring responsibilities (pre pandemic)</b>         |               |                  |                  |                  |
| No                                                          | 1361 (87.55%) | 1.00             | 1.00             | 1.00             |
| yes                                                         | 195 (12.45%)  | 1.74 (1.20-2.53) | 0.79 (0.52-1.21) | 1.63 (1.11-2.40) |
| <b>Extra or new caring responsibilities during pandemic</b> |               |                  |                  |                  |
| No                                                          | 1285 (82.10%) | 1.00             | 1.00             | 1.00             |
| yes                                                         | 271 (17.90%)  | 1.77 (1.29-2.43) | 1.01 (0.71-1.42) | 1.35 (0.97-1.87) |



|  |  |  |  |  |
|--|--|--|--|--|
|  |  |  |  |  |
|--|--|--|--|--|

**Table 4 – Association between CMD, Hazardous drinking and Loneliness and COVID-19 stressors**  
(Weighted percentages and odds ratios are presented in tables to account for response weights, together with unweighted cell counts.)

\* Adjusted for sex, age, education, marital status, rank, service

| COVID-19 Stressors                                         | n (%)         | Common Mental Disorders (CMD) (AOR 95% CI) *<br>N = 376<br>(25.97%) | Hazardous drinking (AUDIT ≥8) (AOR 95% CI) *<br>N = 367<br>(27.82%) | Loneliness (AOR 95% CI) *<br>N = 395<br>(27.42%) |
|------------------------------------------------------------|---------------|---------------------------------------------------------------------|---------------------------------------------------------------------|--------------------------------------------------|
| <b>Financial problems</b>                                  |               |                                                                     |                                                                     |                                                  |
| No                                                         | 1379 (86.96%) | 1.00                                                                | 1.00                                                                | 1.00                                             |
| yes                                                        | 183 (13.04%)  | 2.93 (2.06-4.15)                                                    | 1.04 (0.69-1.57)                                                    | 1.75 (1.20-2.56)                                 |
| <b>Had difficulty accessing enough food</b>                |               |                                                                     |                                                                     |                                                  |
| No                                                         | 1533 (97.91%) | 1.00                                                                | 1.00                                                                | 1.00                                             |
| Yes                                                        | 29 (2.09%)    | 3.10 (1.35-7.16)                                                    | 1.64 (0.70-3.82)                                                    | 3.91 (1.57-9.73)                                 |
| <b>Had difficulty accessing medication</b>                 |               |                                                                     |                                                                     |                                                  |
| No                                                         | 1490 (94.86%) | 1.00                                                                | 1.00                                                                | 1.00                                             |
| Yes                                                        | 72 (5.14%)    | 2.32 (1.34-4.02)                                                    | 1.01 (0.52-1.95)                                                    | 3.48 (1.90-6.38)                                 |
| <b>Had difficulty with health</b>                          |               |                                                                     |                                                                     |                                                  |
| No                                                         | 1374 (87.49%) | 1.00                                                                | 1.00                                                                | 1.00                                             |
| Yes                                                        | 188 (12.51%)  | 6.94 (4.91-9.83)                                                    | 1.73 (1.19-2.51)                                                    | 2.96 (2.07-4.22)                                 |
| <b>Had somebody close in hospital</b>                      |               |                                                                     |                                                                     |                                                  |
| No                                                         | 1460 (93.24%) | 1.00                                                                | 1.00                                                                | 1.00                                             |
| Yes                                                        | 102 (6.76%)   | 2.40 (1.51-3.81)                                                    | 1.25 (0.76-2.07)                                                    | 1.33 (0.81-2.18)                                 |
| <b>Lost somebody close</b>                                 |               |                                                                     |                                                                     |                                                  |
| No                                                         | 1489 (94.90%) | 1.00                                                                | 1.00                                                                | 1.00                                             |
| Yes                                                        | 73 (5.10%)    | 1.85 (1.06-3.22)                                                    | 0.63 (0.32-1.26)                                                    | 1.13 (0.64-2.01)                                 |
| <b>Had to change delay or major plan</b>                   |               |                                                                     |                                                                     |                                                  |
| No                                                         | 1198 (76.26%) | 1.00                                                                | 1.00                                                                | 1.00                                             |
| Yes                                                        | 364 (23.74%)  | 2.50 (1.89-3.32)                                                    | 1.16 (0.85-1.57)                                                    | 1.88 (1.40-2.51)                                 |
| <b>Difficulties with family/other social relationships</b> |               |                                                                     |                                                                     |                                                  |
| No                                                         | 1284 (80.53%) | 1.00                                                                | 1.00                                                                | 1.00                                             |
| Yes                                                        | 278 (19.47%)  | 5.29 (3.85-7.27)                                                    | 1.70 (1.22-2.36)                                                    | 4.01 (2.91-5.55)                                 |
| <b>Difficulties with internet access</b>                   |               |                                                                     |                                                                     |                                                  |
| No                                                         | 1455 (92.95%) | 1.00                                                                | 1.00                                                                | 1.00                                             |
| Yes                                                        | 107 (7.05%)   | 1.84 (1.17-2.88)                                                    | 1.06 (0.65-1.72)                                                    | 2.28 (1.43-3.63)                                 |
| <b>Work difficulties</b>                                   |               |                                                                     |                                                                     |                                                  |
| No                                                         | 1293 (81.03%) | 1.00                                                                | 1.00                                                                | 1.00                                             |

|                               |               |                  |                  |                  |
|-------------------------------|---------------|------------------|------------------|------------------|
| Yes                           | 269 (18.97%)  | 4.12 (3.01-5.65) | 1.39 (1.00-1.94) | 2.35 (1.70-3.25) |
| <b>Difficulties with pets</b> |               |                  |                  |                  |
| No                            | 1522 (97.46%) | 1.00             | 1.00             | 1.00             |
| Yes                           | 40 (2.54%)    | 2.79 (1.44-5.41) | 0.90 (0.40-2.05) | 1.28 (0.63-2.59) |
| <b>Boredom</b>                |               |                  |                  |                  |
| No                            | 1210 (75.06%) | 1.00             | 1.00             | 1.00             |
| Yes                           | 352 (24.94%)  | 2.88 (2.15-3.85) | 1.75 (1.28-2.39) | 2.96 (2.21-3.96) |

### Adjusting for previous CMD and hazardous drinking

Adjusting for previous CMD or hazardous drinking case status reported at phase three of our health and wellbeing study attenuated the association of CMD and of hazardous drinking with COVID-19 experiences and stressors, but it did not change the direction of association, and the majority of associations remained significant at the 95% level (supplemental information Table 2). For four COVID-19 experiences or stressors, the associations become non-significant, yet their effect size remained large. These included the association of reporting CMD symptoms and living alone, difficulty access enough food, difficulty accessing medication, and losing someone close to you (supplemental information Table 2).

## DISCUSSION

Compared to pre-pandemic levels taken in 2014-2016, levels of CMDs in UK veterans remained stable. Veterans reported statistically significant reductions in levels of hazardous drinking during the pandemic compared to pre-pandemic levels. 27.4% reported feelings of loneliness. Just under 15% of people in the study self-reported definitely or probably having COVID-19. Half of individuals with children who they were responsible for reported that changes in childcare negatively affected their life and nearly a fifth of individuals had new or extra caring responsibilities because of the pandemic. The most common COVID-19 stressors reported were boredom, having to change major life plans, and difficulties with family or other social relationships. The COVID-19 stressors of difficulties with family or other social relationships, boredom and difficulties with health were all associated with veterans reporting CMD, hazardous drinking and loneliness. Adjustment for previous CMD or hazardous alcohol use did not change the direction of association and the majority of associations remained statistically significant. Our study identifies there may be a specific impact of COVID-19 experiences and stressors on veterans' CMD, alcohol use and loneliness outcomes.

CMD levels have remained stable with a small, statistically non-significant increase. This should be compared to population data showing significant increases in CMD in the general population. For example, ONS figures found a 9.5% increase in depression from the period July 2019-March 2020 to June 2020 [6]; The UKHLS reported a 7.6% increase in CMD between 2017-2019 and April 2020 [4]. Veterans' pre-pandemic CMD levels were higher than the general population levels (Vet-CHECK Phase three 2014-2016: 24.5% v UKHLS 2018-2019: 18.9% [4]) but were similar during the pandemic (UK studies ranging from 26.0% to 30.6% [4, 27, 28]). The absence of a similarly large increase in CMD caseness in the veteran group may indicate resilient responses in this group who have been previously trained in readiness for deployments, resilience and coping strategies [15, 29, 30]



1  
2  
3 From further analyses of the veteran sample (available upon request), of the 373 CMD cases, 214  
4 (56.6%) of these were new cases since 2014-2016 (with a similar number of remitting cases). Hence  
5 whilst numbers potentially needing clinical treatment remain similar, there may be new individuals  
6 that need to engage with services. Additionally, as a majority of the COVID-19 experiences and  
7 stressors (particularly difficulties with health, work, or family/other social relationships) were  
8 associated with CMD symptoms, it may be this veteran group with CMD particularly impacted by  
9 COVID-19 pressures. Similar COVID-19 pressures on families and negative associations with mental  
10 health outcomes are reported in US samples [31]. As found in our study, the UKHLS finds negative  
11 mental health impacts for parents with childcare responsibilities and home schooling requirements  
12 during the pandemic [32]. One fifth of our sample had extra or new caring responsibilities during the  
13 pandemic which may have added to family stress levels. Previous research has shown how  
14 important social connection is for carers' mental health outcomes [33] and lockdown and social  
15 distancing needs may have disrupted support for carers in this sample.

16  
17 Compared to veterans drinking behaviours pre-pandemic in 2014-2016, levels of hazardous drinking  
18 and alcohol misuse reduced (hazardous drinking: 48.5% v 27.6% and alcohol misuse: 9.2% v 3.7%  
19 respectively). However, we found the Veterans-CHECK sample to be consuming alcohol, as  
20 measured by the AUDIT-C, at higher levels than the general population in England during the  
21 pandemic (Veterans-CHECK 49.2% v 38.3% [34]). Hence despite reductions in hazardous drinking and  
22 alcohol misuse for veterans in this sample, and increases in general population high-risk drinking, a  
23 higher proportion of veterans are still in high risk drinking categories. This finding continues to  
24 mirror previous studies that find veterans drinking at higher levels than the general population [35].

25  
26 There may be several explanations for the reduction in hazardous drinking. Alcohol has often been  
27 using as a social bonding tool in Armed Forces community [36, 37], therefore the closing or  
28 restrictions placed on the hospitality business may explain the reduction in alcohol consumption.  
29 Alternatively, this may represent a general population trend observed in the UK population where  
30 high risk drinkers have reduced their alcohol consumption [28, 34]. The Covid-19 Social Study  
31 reports that drinking less during the pandemic was associated with being male [38], and our sample  
32 is predominantly male. The study identified that responders were less likely to have reported alcohol  
33 misuse before the pandemic, however differences in reported alcohol use between responders and  
34 non-responders were minimal. Non-responders may have mirrored general population trends of  
35 male and high risk drinkers reduction efforts [28, 34, 38] and therefore also followed this reduction  
36 trend. Few COVID-19 stressors were associated with hazardous drinking and therefore we could  
37 surmise that alcohol was not being used as a coping mechanism in this community during the  
38 pandemic.

39  
40 Our veteran sample reported lower levels of loneliness compared to a UK general population sample  
41 from the COVID-19 Social Study (26% v 39%) [39] and similar levels to another study (27%) [40]. An  
42 explanation could be that our study collected data during June to September when lockdown  
43 restrictions were less than in March to May when the other studies collected their data.  
44 Additionally, the veteran sample may have a level of protection against loneliness due to a majority  
45 being in a relationship. Of note are the findings that individuals with children under 18 years of age,  
46 and those with caring responsibilities, were more likely to report feelings of loneliness. We,  
47 therefore, see a pattern of extra pressures on those with family responsibilities, who would not have  
48  
49  
50  
51  
52  
53  
54  
55  
56  
57  
58  
59  
60

1  
2  
3 had the usual social support networks due to restrictions. The finding that key workers in health and  
4 social care were more likely to report feeling lonely compared to other key workers, highlights the  
5 extra support that healthcare key workers may need in the pandemic [41].  
6  
7

8 As seen elsewhere, boredom was common in veterans during the pandemic and was strongly  
9 associated with CMD, hazardous alcohol use and loneliness [42], and has been associated with  
10 psychological distress for individuals who reported 'high meaning in life', as defined as stable sense  
11 of purpose and fulfilment in life[43]. With restrictions reintroduced in the Winter of 2020 and into  
12 2021, the long-term effect of boredom on veterans' wellbeing, identity, purpose and fulfilment  
13 remains to be seen [3].  
14  
15  
16

17 Whilst CMD levels in our veteran group has not risen from pre-pandemic levels, there are still a  
18 significant minority of veterans that may need mental health treatment and support. Due to the  
19 nature of COVID-19 lockdowns and restrictions in the UK, the National Health Service and charitable  
20 providers should particularly focus on the benefits of telemedicine for veterans into the future [16,  
21 44, 45]. Our study demonstrates an impact of the pandemic on veteran families increasing their  
22 stress, relationship/caring difficulties and responsibilities. There has been success in the US  
23 promoting parenting skills for veteran families under COVID-19 pressures [46], while in the UK,  
24 resources created by King's College London and partners offer practical support for families  
25 ('Families Under Pressure') which could be utilised by veteran groups [47]. As with the general  
26 population, innovative ways are needed to tackle loneliness and improve social networks and  
27 support during the pandemic, particularly focused on those with mental health needs [48, 49].  
28  
29  
30  
31  
32

33 The study strengths include recruitment from a cohort whose previous mental health status is  
34 known, rapid roll-out, and use of validated measures for mental health and wellbeing outcomes  
35 aligned with our previous study and other UK general population studies' measures. Study  
36 limitations include recruitment from a specific veteran cohort serving during the Iraq/Afghanistan  
37 era and therefore we cannot comment on the experiences of veterans outside of this era. Only a  
38 minority of veterans in this sample were newly transitioned to civilian life and therefore this study  
39 may not capture the experiences of those who have recently left service, some of whom may be  
40 negatively impacted by this pressure point [50]. There were only a small number of younger 'other  
41 ranks' in this sample who may be more likely to experience financial issues [51] and therefore the  
42 extent of negative associations between COVID-19 stressors and outcomes may not be fully  
43 represented. The study identified that responders were less likely to have reported alcohol misuse  
44 before the pandemic and therefore the direction of alcohol use of non-responders is unknown which  
45 may underestimate reductions in alcohol use during the pandemic. Whilst we were able to identify  
46 similar trends in women veterans for CMD and drinking compared to male veterans in this sample,  
47 the number of women in the sample was insufficient to robustly examine associations of COVID-19  
48 stressors and outcomes. Whilst the study captures data from veterans regarding their family  
49 experiences, such as relationship, childcare and caring pressures, the study was not able to collect  
50 data from veterans' partners/spouses and children themselves. The study is limited by the majority  
51 of responses arising from veterans living in England and limited to the context of the pandemic in  
52 the UK, June-September 2020.  
53  
54  
55  
56  
57  
58  
59  
60

## CONCLUSIONS

Our study suggests a COVID-19 impact on veterans' mental health, alcohol use and loneliness, particularly for those experiencing difficulties with family or social relationships. Veterans experienced the pandemic in similar ways to the general population and in some cases may have responded in resilient ways. Whilst stable levels of CMD and reduction in alcohol use are positive, there remains a group of veterans that may need mental health and alcohol treatment services. There is a need to continue to follow up the health and wellbeing of this veteran group to assess developments longer term over the pandemic.

For peer review only

## Funding Statement

This work was funded by the Office of Veterans' Affairs, Cabinet Office, UK Government (Contract Ref: CCZZ20A51).

## Competing Interests

SW is Honorary Civilian Consultant Advisor in Psychiatry for the British Army (unpaid). S.W. is affiliated to the National Institute for Health Research Health Protection Research Unit (NIHR HPRU) in Emergency Preparedness and Response at King's College London in partnership with Public Health England, in collaboration with the University of East Anglia and Newcastle University.

NTF is a trustee (unpaid) of The Warrior Programme, an independent advisor to the Independent Group Advising on the Release of Data (IGARD), a member of Independent Scientific Pandemic Insights Group on Behaviours (SPI-B) and their salary is part grant funded by the MoD.

DM is a trustee of the Forces in Mind Trust (unpaid) and is employed as the Head of Research for Combat Stress, a UK Veterans Mental Health Charity.

## Acknowledgements

We acknowledge the contribution to the framing of the protocol for this research by Dr Sharon Stevelink, Dr Daniel Leightley and Rupa Bhundia through their work with the KCL-CHECK and NHS-CHECK studies. We thank the KCMHR colleagues and the veterans who helped to shape the survey questionnaire.

## Authors' Contributions

MLS, DS, MJ, HB, DP, LH, DP, DM, SW, NTF were involved in the original concept and design of the study. NTF and SW have overseen the conduct of all aspects of the study. MLS led on the formulation of the questionnaire and associated measures, with substantial contributions from all authors in shaping the final questionnaire. DP led on online survey design, format and flow. DS led on the ethics submission with substantial contributions from all authors. MJ, HB and LH led on the design of participant materials including the participant invite and information sheet with input from all authors. MJ led on the data analysis plan and conducted the data analysis with input from all authors. MLS and DS led the writing of the research paper, with drafting and revision input from all authors. MLS, DS, MJ, HB, DP, LH, DP, DM, SW, NTF have all seen and approved the final version of this paper and accept accountability for all aspects of the work. SW and NTF secured the funding from OVA for this work.

## Data Sharing Statement

Data will be processed in accordance with the General Data Protection Regulation (GDPR) and the Data Protection Act 2018. We will not make any record-level data publicly accessible because we need to protect the confidentiality and security of the individual cohort members. You are welcome to contact us with proposals for collaborative research, which the investigators will consider on a case-by-case basis, and which will only occur as part of a legal collaborative agreement and after the collaborator has put in place the relevant research ethics, data protection, and data access approvals.

## REFERENCES

1. Hale, T., et al. *Oxford COVID-19 Government Response Tracker*. 2020.
2. Douglas, M., et al., *Mitigating the wider health effects of covid-19 pandemic response*. *BMJ*, 2020. **369**: p. m1557.
3. Brooks, S.K., et al., *The psychological impact of quarantine and how to reduce it: rapid review of the evidence*. *The Lancet*, 2020.
4. Pierce, M., et al., *Mental health before and during the COVID-19 pandemic: a longitudinal probability sample survey of the UK population*. *The Lancet Psychiatry*, 2020. **7**(10): p. 883-892.
5. Banks, J. and X. Xu, *The mental health effects of the first two months of lockdown and social distancing during the Covid-19 pandemic in the UK (No. W20/16)*, I.W. Papers, Editor. 2020: Institute for Fiscal Studies (IFS), London.
6. ONS, *Coronavirus and depression in adults, Great Britain: June 2020*. 2020.
7. MOD, *Annual Population Survey: UK Armed Forces Veterans residing in Great Britain, 2017*, Ministry of Defence. 2019.
8. Asmundson, G.J.G., et al., *Do pre-existing anxiety-related and mood disorders differentially impact COVID-19 stress responses and coping?* *Journal of anxiety disorders*, 2020. **74**: p. 102271-102271.
9. Stevelink, S.A., et al., *Mental health outcomes at the end of the British involvement in the Iraq and Afghanistan conflicts: a cohort study*. *The British Journal of Psychiatry*, 2018. **213**(6): p. 690-697.
10. Murphy, D. and W. Busuttil, *Understanding the needs of veterans seeking support for mental health difficulties*. 2019, British Medical Journal Publishing Group.
11. HelpforHeroes, *Wounded veterans face health worries during the Covid-19 pandemic*. 2020, Help For Heroes.
12. Wilson, G., M. Hill, and M.D. Kiernan, *Loneliness and social isolation of military veterans: systematic narrative review*. *Occupational Medicine*, 2018. **68**(9): p. 600-609.
13. Royal British Legion, *Loneliness and social isolation in the armed forces community*. 2018.
14. Austin, G., et al., *Soldiering on only goes so far: How a qualitative study on Veteran loneliness in New Zealand influenced support during COVID-19 lockdown*. *Journal of Military, Veteran and Family Health*, 2020. **COVID-19**: p. Author's original, CO19007.
15. Nindl, B.C., et al., *Perspectives on resilience for military readiness and preparedness: Report of an international military physiology roundtable*. *Journal of Science and Medicine in Sport*, 2018. **21**(11): p. 1116-1124.
16. Mcfarlane, A., et al., *Impact of COVID-19 on mental health care for Veterans: Improve, adapt and overcome*. *Journal of Military, Veteran and Family Health*, 2020. **COVID-19**: p. Accepted version, CO19001.
17. Rona, R.J., et al., *Mental health screening in armed forces before the Iraq war and prevention of subsequent psychological morbidity: follow-up study*. *bmj*, 2006. **333**(7576): p. 991.
18. Hotopf, M., et al., *The health of UK military personnel who deployed to the 2003 Iraq war: a cohort study*. *The lancet*, 2006. **367**(9524): p. 1731-1741.
19. Fear, N.T., et al., *What are the consequences of deployment to Iraq and Afghanistan on the mental health of the UK armed forces? A cohort study*. *The Lancet*, 2010. **375**(9728): p. 1783-1797.
20. REDCap. [cited 2020; Available from: <https://www.project-redcap.org/>].
21. Sharp, M.-L., et al., *COVID-19: Impact on the health and wellbeing of ex-serving personnel (Veterans-CHECK) protocol paper*. medRxiv, 2020.
22. Goldberg, D.P. and B. Blackwell, *Psychiatric illness in general practice: a detailed study using a new method of case identification*. *British medical journal*, 1970. **2**(5707): p. 439.
23. Babor, T.F., et al., *AUDIT: The Alcohol Use Disorders Identification Test. Guidelines for use in primary care*, Geneva. World Health Organization, 2001.

- 1
  - 2
  - 3
  - 4
  - 5
  - 6
  - 7
  - 8
  - 9
  - 10
  - 11
  - 12
  - 13
  - 14
  - 15
  - 16
  - 17
  - 18
  - 19
  - 20
  - 21
  - 22
  - 23
  - 24
  - 25
  - 26
  - 27
  - 28
  - 29
  - 30
  - 31
  - 32
  - 33
  - 34
  - 35
  - 36
  - 37
  - 38
  - 39
  - 40
  - 41
  - 42
  - 43
  - 44
  - 45
  - 46
  - 47
  - 48
  - 49
  - 50
  - 51
  - 52
  - 53
  - 54
  - 55
  - 56
  - 57
  - 58
  - 59
  - 60
24. Crawford, E.F., et al., *Diagnostic efficiency of the AUDIT-C in US veterans with military service since September 11, 2001*. Drug and Alcohol Dependence, 2013. **132**(1-2): p. 101-106.
25. Hughes, M.E., et al., *A short scale for measuring loneliness in large surveys: Results from two population-based studies*. Research on aging, 2004. **26**(6): p. 655-672.
26. StataCorp., *Stata Statistical Software: Release 16*. 2019, StataCorp LLC: College Station, TX.
27. Fancourt, D., A. Steptoe, and F. Bu, *Trajectories of depression and anxiety during enforced isolation due to COVID-19: longitudinal analyses of 36,520 adults in England*. medRxiv, 2020.
28. Niedzwiedz, C.L., et al., *Mental health and health behaviours before and during the initial phase of the COVID-19 lockdown: longitudinal analyses of the UK Household Longitudinal Study*. J Epidemiol Community Health, 2020.
29. MacManus, D., et al., *The mental health of the UK Armed Forces in the 21st century: resilience in the face of adversity*. BMJ Military Health, 2014. **160**(2): p. 125-130.
30. Mulligan, K., et al., *Psycho-educational interventions designed to prevent deployment-related psychological ill-health in Armed Forces personnel: A review*. Psychological medicine, 2011. **41**(4): p. 673.
31. Brown, S.M., et al., *Stress and parenting during the global COVID-19 pandemic*. Child abuse & neglect, 2020: p. 104699.
32. Tani, M., et al., *Working Parents, Financial Insecurity, and Child-Care: Mental Health in the Time of COVID-19*. 2020.
33. Vlachantoni, A., et al., *Social Participation and Health Outcomes Among Caregivers and Noncaregivers in Great Britain*. Journal of Applied Gerontology, 2019: p. 0733464819885528.
34. Jackson, S.E., et al., *Association of the Covid-19 lockdown with smoking, drinking, and attempts to quit in England: an analysis of 2019-2020 data*. Addiction, 2020.
35. Rhead, R., et al., *Mental Health Disorders and Alcohol Misuse Among UK Military Veterans and the General Population: A Comparison Study*. Psychological Medicine, 1-11. doi:10.1017/S0033291720001944, 2019.
36. Irizar, P., et al., *Drinking motivations in UK serving and ex-serving military personnel*. Occupational Medicine, 2020.
37. Jones, E. and N.T. Fear, *Alcohol use and misuse within the military: a review*. International review of psychiatry, 2011. **23**(2): p. 166-172.
38. Garnett, C., et al., *Factors associated with drinking behaviour during COVID-19 social distancing and lockdown among adults in the UK*. medRxiv, 2020.
39. Bu, F., A. Steptoe, and D. Fancourt, *Who is lonely in lockdown? Cross-cohort analyses of predictors of loneliness before and during the COVID-19 pandemic*. medRxiv, 2020.
40. Groarke, J.M., et al., *Loneliness in the UK during the COVID-19 pandemic: Cross-sectional results from the COVID-19 Psychological Wellbeing Study*. PloS one, 2020. **15**(9): p. e0239698.
41. Greenberg, N., et al., *Managing mental health challenges faced by healthcare workers during covid-19 pandemic*. bmj, 2020. **368**.
42. Brodeur, A., et al., *Assessing the impact of the coronavirus lockdown on unhappiness, loneliness, and boredom using Google Trends*. arXiv preprint arXiv:2004.12129, 2020.
43. Chao, M., et al., *Psychological distress and state boredom during the COVID-19 outbreak in China: the role of meaning in life and media use*. European journal of psychotraumatology, 2020. **11**(1): p. 1769379.
44. Sciarrino, N.A., U.S. Myers, and B.C. Wangelin, *When chaos is the norm: How some veterans with PTSD are continuing to engage in trauma-focused treatments during the COVID-19 pandemic*. Psychological Trauma: Theory, Research, Practice, and Policy, 2020. **12**(S1): p. S69.



- 1  
2  
3 45. Ashwick, R., D. Turgoose, and D. Murphy, *Exploring the acceptability of delivering Cognitive*  
4 *Processing Therapy (CPT) to UK veterans with PTSD over Skype: A qualitative study*. European  
5 *Journal of Psychotraumatology*, 2019. **10**(1): p. 1573128.  
6  
7 46. James Riegler, L., et al., *Pilot trial of a telepsychotherapy parenting skills intervention for*  
8 *veteran families: Implications for managing parenting stress during COVID-19*. *Journal of*  
9 *Psychotherapy Integration*, 2020. **30**(2): p. 290.  
10 47. Sonuga-Barke, E. *Families Under Pressure (POP-UP team)*. 2020 [cited 2020 November];  
11 Available from: <https://maudsleycharity.org/familiesunderpressure/>.  
12 48. Hatch, S.L., et al., *Life in and after the Armed Forces: social networks and mental health in*  
13 *the UK military*. *Sociology of health & illness*, 2013. **35**(7): p. 1045-1064.  
14 49. Murphy, D., *Exploring the impact of Covid-19 and restrictions to daily living as a result of*  
15 *social distancing within veterans with pre-existing mental health difficulties*. 2020.  
16 50. Ashcroft, M., *The veterans' transition review*. 2014.  
17 51. RBL, *A UK household survey of the ex-service community*. 2014.  
18  
19  
20  
21  
22  
23  
24  
25  
26  
27  
28  
29  
30  
31  
32  
33  
34  
35  
36  
37  
38  
39  
40  
41  
42  
43  
44  
45  
46  
47  
48  
49  
50  
51  
52  
53  
54  
55  
56  
57  
58  
59  
60

## Supplemental Information

**Table 1** - Comparison of social and military demographic characteristics of responders and non-responders. Column percentages. N = 3547

|                                  | Responder<br>N = 1562 | Non responder<br>N = 1985 | OR (95%CI)       | AOR (95% CI)*    |
|----------------------------------|-----------------------|---------------------------|------------------|------------------|
| Sex                              |                       |                           |                  |                  |
| male                             | 1,383(88.54%)         | 1,794(90.38%)             | 1.00             | 1.00             |
| female                           | 179(11.46%)           | 191(9.62%)                | 1.22 (0.98-1.51) | 1.51 (1.21-1.90) |
| Age band                         |                       |                           |                  |                  |
| 25-34                            | 46(2.94%)             | 190(9.57%)                | 0.31 (0.22-0.44) | 0.34 (0.23-0.49) |
| 35-44                            | 272(17.41%)           | 552(27.81%)               | 0.63 (0.53-0.76) | 0.63 (0.52-0.77) |
| 45-54                            | 554(35.47%)           | 710(35.77%)               | 1.00             | 1.00             |
| 55-64                            | 514(32.91%)           | 444(22.37%)               | 1.48 (1.25-1.76) | 1.51 (1.27-1.79) |
| 65 and over                      | 176(11.27%)           | 89(4.48%)                 | 2.53 (1.92-3.35) | 2.56 (1.91-3.43) |
| Rank                             |                       |                           |                  |                  |
| Officer                          | 478(30.60%)           | 462(23.27%)               | 1.31 (1.12-1.53) | 1.02 (0.85-1.22) |
| NCO                              | 954(61.08%)           | 1,209(60.91%)             | 1.00             | 1.00             |
| Other rank                       | 130(8.32%)            | 314(15.82)                | 0.52 (0.42-0.66) | 0.92 (0.71-1.19) |
| Service                          |                       |                           |                  |                  |
| Royal Navy                       | 290(18.57%)           | 393(19.80%)               | 1.02 (0.85-1.21) | 0.88 (0.74-1.06) |
| Army                             | 873(55.89%)           | 1,201(60.50%)             | 1.00             | 1.00             |
| RAF                              | 399(25.54%)           | 391(19.70%)               | 1.40 (1.19-1.65) | 1.18 (0.99-1.40) |
| Education level                  |                       |                           |                  |                  |
| No qualifications/O-levels/GCSEs | 385(24.65%)           | 577(29.10%)               | 0.72 (0.61-0.85) | 0.83 (0.69-1.00) |
| A-level                          | 506(32.39%)           | 682(34.39%)               | 0.80 (0.69-0.94) | 0.93 (0.78-1.10) |
| Degree                           | 671(42.96%)           | 724(36.51%)               | 1.00             | 1.00             |
| Relationship status              |                       |                           |                  |                  |
| In a relationship                | 1,337(86.82%)         | 1,679(86.24%)             | 1.00             | 1.00             |
| Single                           | 90(5.84%)             | 145(7.45%)                | 0.78 (0.59-1.02) | 1.03 (0.77-1.37) |
| Ex-relationship                  | 113(7.34%)            | 123(6.32%)                | 1.15 (0.88-1.50) | 1.06 (0.80-1.39) |

\*adjusted for sex, age, education, service and rank



**Table 2 – Association between CMD, Hazardous alcohol consumption and Loneliness and COVID19 experiences and stressors**

|                                            | N (%)         | Common Mental Disorders (AOR 95% CI) *<br>N = 376<br>(25.97%) | Common Mental Disorders (AOR 95% CI) **<br>N = 376<br>(25.97%) | Hazardous drinking (AUDIT ≥8) (AOR 95% CI) *<br>N = 367<br>(27.82%) | Hazardous drinking (AUDIT ≥8) (AOR 95% CI) **<br>N = 367<br>(27.82%) |
|--------------------------------------------|---------------|---------------------------------------------------------------|----------------------------------------------------------------|---------------------------------------------------------------------|----------------------------------------------------------------------|
| <b>Had or have COVID-19</b>                |               |                                                               |                                                                |                                                                     |                                                                      |
| No                                         | 866 (53.80%)  | 1.00                                                          | 1.00                                                           | 1.00                                                                | 1.00                                                                 |
| Yes (definitely/probably)                  | 226 (14.83%)  | 1.55 (1.08-2.22)                                              | 1.49 (1.02-2.16)                                               | 0.80 (0.55-1.16)                                                    | 0.68 (0.45-1.05)                                                     |
| Don't know                                 | 470 (31.37%)  | 1.06 (0.79-1.43)                                              | 1.03 (0.76-1.40)                                               | 0.78 (0.58-1.05)                                                    | 0.70 (0.50-0.98)                                                     |
| <b>Had to isolate</b>                      |               |                                                               |                                                                |                                                                     |                                                                      |
| No                                         | 1310 (83.51%) | 1.00                                                          | 1.00                                                           | 1.00                                                                |                                                                      |
| Yes                                        | 249 (16.49%)  | 1.33 (0.96-1.85)                                              | 1.24 (0.88-1.74)                                               | 0.89 (0.63-1.26)                                                    | 0.69 (0.47-1.02)                                                     |
| <b>Know someone who died from COVID-19</b> |               |                                                               |                                                                |                                                                     |                                                                      |
| No                                         | 1276 (81.52%) | 1.00                                                          |                                                                | 1.00                                                                |                                                                      |
| Yes                                        | 286 (18.48%)  | 1.76 (1.29-2.40)                                              | 1.73 (1.26-2.38))                                              | 0.95 (0.68-1.33)                                                    | 0.97 (0.66-1.43)                                                     |
| <b>Change in employment</b>                |               |                                                               |                                                                |                                                                     |                                                                      |
| no change or furlough                      | 1425 (91.60%) | 1.00                                                          |                                                                | 1.00                                                                |                                                                      |
| change for worse                           | 134 (8.40%)   | 3.14 (2.15-4.60)                                              | 3.07 (2.03-4.65)                                               | 1.26 (0.82-1.93)                                                    | 1.04 (0.64-1.71)                                                     |
| <b>Key Worker</b>                          |               |                                                               |                                                                |                                                                     |                                                                      |
| Not a key worker                           | 880 (53.72%)  | 1.42 (1.06-1.89)                                              | 1.43 (1.06-1.93)                                               | 1.09 (0.81-1.45)                                                    | 0.87 (0.63-1.22)                                                     |
| Key worker – Health and social care        | 131 (8.79%)   | 1.40 (0.85-2.31)                                              | 1.33 (0.77-2.30)                                               | 0.81 (0.47-1.38)                                                    | 0.70 (0.40-1.21)                                                     |
| Key workers - All other roles              | 543 (37.48%)  | 1.00                                                          |                                                                | 1.00                                                                | 1.00                                                                 |
| <b>Who usually live with</b>               |               |                                                               |                                                                |                                                                     |                                                                      |
| Live alone                                 | 170 (11.04%)  | 2.11 (1.07-4.16)                                              | 1.82 (0.91-3.66)                                               | 1.56 (0.82-2.96)                                                    | 1.81 (0.88-3.71)                                                     |
| Live with spouse/partner                   | 1328 (84.55%) | 1.00                                                          | 1.00                                                           | 1.00                                                                | 1.00                                                                 |
| Live with others                           | 59 (4.41%)    | 1.59 (0.55-4.60)                                              | 1.40 (0.51-3.86)                                               | 0.95 (0.35-2.59)                                                    | 1.11 (0.36-3.45)                                                     |
| <b>Children</b>                            |               |                                                               |                                                                |                                                                     |                                                                      |
| Have no children                           | 357 (24.50%)  | 1.00                                                          | 1.00                                                           | 1.00                                                                | 1.00                                                                 |
| Have children but not responsible for      | 666 (36.04%)  | 1.14 (0.78-1.67)                                              | 1.09 (0.74-1.59)                                               | 0.93 (0.64-1.36)                                                    | 1.05 (0.68-1.62)                                                     |

|                                                             | N (%)         | Common Mental Disorders (AOR 95% CI) *<br>N = 376 (25.97%) | Common Mental Disorders (AOR 95% CI) **<br>N = 376 (25.97%) | Hazardous drinking (AUDIT ≥8) (AOR 95% CI) *<br>N = 367 (27.82%) | Hazardous drinking (AUDIT ≥8) (AOR 95% CI) **<br>N = 367 (27.82%) |
|-------------------------------------------------------------|---------------|------------------------------------------------------------|-------------------------------------------------------------|------------------------------------------------------------------|-------------------------------------------------------------------|
| Responsible for one child under 18 years old                | 214 (15.23%)  | 0.87 (0.53-1.41)                                           | 0.88 (0.54-1.46)                                            | 0.92 (0.59-1.44)                                                 | 1.08 (0.64-1.82)                                                  |
| Responsible for two or more children under 18 years of age  | 320 (24.23%)  | 1.56 (1.03-2.37)                                           | 1.62 (1.07-2.47)                                            | 0.87 (0.57-1.33)                                                 | 1.18 (0.72-1.94)                                                  |
| <b>Changed childcare arrangements</b>                       |               |                                                            |                                                             |                                                                  |                                                                   |
| No                                                          | 243 (52.40%)  | 1.00                                                       | 1.00                                                        | 1.00                                                             |                                                                   |
| Yes                                                         | 214 (47.60%)  | 2.31 (1.47-3.64)                                           | 2.24 (1.41-3.54)                                            | 1.15 (0.73-1.84)                                                 | 1.11 (0.65-1.90)                                                  |
| <b>Impact of changed childcare arrangements</b>             |               |                                                            |                                                             |                                                                  |                                                                   |
| Positive impact                                             | 33 (14.08%)   | 0.60 (0.21-1.67)                                           | 0.72 (0.26-1.98)                                            | 1.16 (0.45-3.00)                                                 | 0.99 (0.30-3.26)                                                  |
| Negative impact                                             | 94 (44.73%)   | 1.96 (0.99-3.89)                                           | 1.91 (0.94-3.88)                                            | 1.39 (0.68-2.85)                                                 | 1.27 (0.56-2.87)                                                  |
| Neutral impact                                              | 87 (41.19%)   | 1.00                                                       | 1.00                                                        | 1.00                                                             | 1.00                                                              |
| <b>Usual caring responsibilities (pre pandemic)</b>         |               |                                                            |                                                             |                                                                  |                                                                   |
| No                                                          | 1361 (87.55%) | 1.00                                                       | 1.00                                                        | 1.00                                                             |                                                                   |
| yes                                                         | 195 (12.45%)  | 1.74 (1.20-2.53)                                           | 1.73 (1.19-2.51)                                            | 0.79 (0.52-1.21)                                                 | 0.90 (0.55-1.48)                                                  |
| <b>Extra or new caring responsibilities during pandemic</b> |               |                                                            |                                                             |                                                                  |                                                                   |
| No                                                          | 1285 (82.10%) | 1.00                                                       |                                                             | 1.00                                                             |                                                                   |
| yes                                                         | 271 (17.90%)  | 1.77 (1.29-2.43)                                           | 1.77 (1.27-2.48)                                            | 1.01 (0.71-1.42)                                                 | 1.07 (0.71-1.60)                                                  |
| <b>Financial problems</b>                                   |               |                                                            |                                                             |                                                                  |                                                                   |
| No                                                          | 1379 (86.96%) | 1.00                                                       | 1.00                                                        | 1.00                                                             |                                                                   |
| yes                                                         | 183 (13.04%)  | 2.93 (2.06-4.15)                                           | 2.67 (1.89-3.78)                                            | 1.04 (0.69-1.57)                                                 | 0.96 (0.59-1.58)                                                  |
| <b>Had difficulty accessing enough food</b>                 |               |                                                            |                                                             |                                                                  |                                                                   |
| No                                                          | 1533 (97.9%)  | 1.00                                                       | 1.00                                                        | 1.00                                                             | 1.00                                                              |
| Yes                                                         | 29 (2.09%)    | 3.10 (1.35-7.16)                                           | 2.27 (0.91-5.67)                                            | 1.64 (0.70-3.82)                                                 | 1.28 (0.51-3.21)                                                  |
| <b>Had difficulty accessing medication</b>                  |               |                                                            |                                                             |                                                                  |                                                                   |

|                                                            | N (%)         | Common Mental Disorders (AOR 95% CI) *<br>N = 376 (25.97%) | Common Mental Disorders (AOR 95% CI) **<br>N = 376 (25.97%) | Hazardous drinking (AUDIT ≥8) (AOR 95% CI) *<br>N = 367 (27.82%) | Hazardous drinking (AUDIT ≥8) (AOR 95% CI) **<br>N = 367 (27.82%) |
|------------------------------------------------------------|---------------|------------------------------------------------------------|-------------------------------------------------------------|------------------------------------------------------------------|-------------------------------------------------------------------|
| No                                                         | 1490 (94.86%) | 1.00                                                       | 1.00                                                        | 1.00                                                             | 1.00                                                              |
| Yes                                                        | 72 (5.14%)    | 2.32 (1.34-4.02)                                           | 1.57 (0.89-2.76-)                                           | 1.01 (0.52-1.95)                                                 | 0.82 (0.36-1.86)                                                  |
| <b>Had difficulty with health</b>                          |               |                                                            |                                                             |                                                                  |                                                                   |
| No                                                         | 1374 (87.49%) | 1.00                                                       | 1.00                                                        | 1.00                                                             | 1.00                                                              |
| Yes                                                        | 188 (12.51%)  | 6.94 (4.91-9.83)                                           | 5.47 (3.83-7.81)                                            | 1.73 (1.19-2.51)                                                 | 1.67 (1.07-2.61)                                                  |
| <b>Had somebody close in hospital</b>                      |               |                                                            |                                                             |                                                                  |                                                                   |
| No                                                         | 1460 (93.24%) | 1.00                                                       | 1.00                                                        | 1.00                                                             | 1.00                                                              |
| Yes                                                        | 102 (6.76%)   | 2.40 (1.51-3.81)                                           | 2.50 (1.54-4.05)                                            | 1.25 (0.76-2.07)                                                 | 1.10 (0.60-2.01)                                                  |
| <b>Lost somebody close</b>                                 |               |                                                            |                                                             |                                                                  |                                                                   |
| No                                                         | 1489 (94.90%) | 1.00                                                       | 1.00                                                        | 1.00                                                             | 1.00                                                              |
| Yes                                                        | 73 (5.10%)    | 1.85 (1.06-3.22)                                           | 1.55 (0.86-2.79)                                            | 0.63 (0.32-1.26)                                                 | 0.51 (0.22-1.17)                                                  |
| <b>Had to change delay or major plan</b>                   |               |                                                            |                                                             |                                                                  |                                                                   |
| No                                                         | 1198 (76.26%) | 1.00                                                       | 1.00                                                        | 1.00                                                             | 1.00                                                              |
| Yes                                                        | 364 (23.74%)  | 2.50 (1.89-3.32)                                           | 2.27 (1.69-3.06)                                            | 1.16 (0.85-1.57)                                                 | 0.97 (0.68-1.38)                                                  |
| <b>Difficulties with family/other social relationships</b> |               |                                                            |                                                             |                                                                  |                                                                   |
| No                                                         | 1284 (80.53%) | 1.00                                                       | 1.00                                                        | 1.00                                                             | 1.00                                                              |
| Yes                                                        | 278 (19.47%)  | 5.29 (3.85-7.27)                                           | 4.64 (3.33-6.46)                                            | 1.70 (1.22-2.36)                                                 | 1.56 (1.05-2.30)                                                  |
| <b>Difficulties with internet access</b>                   |               |                                                            |                                                             |                                                                  |                                                                   |
| No                                                         | 1455 (92.95%) | 1.00                                                       | 1.00                                                        | 1.00                                                             | 1.00                                                              |
| Yes                                                        | 107 (7.05%)   | 1.84 (1.17-2.88)                                           | 1.88 (1.18-3.00)                                            | 1.06 (0.65-1.72)                                                 | 1.31 (0.75-2.26)                                                  |
| <b>Work difficulties</b>                                   |               |                                                            |                                                             |                                                                  |                                                                   |
| No                                                         | 1293 (81.03%) | 1.00                                                       | 1.00                                                        | 1.00                                                             | 1.00                                                              |

|                               | N (%)         | Common Mental Disorders (AOR 95% CI) *<br>N = 376 (25.97%) | Common Mental Disorders (AOR 95% CI) **<br>N = 376 (25.97%) | Hazardous drinking (AUDIT ≥8) (AOR 95% CI) *<br>N = 367 (27.82%) | Hazardous drinking (AUDIT ≥8) (AOR 95% CI) **<br>N = 367 (27.82%) |
|-------------------------------|---------------|------------------------------------------------------------|-------------------------------------------------------------|------------------------------------------------------------------|-------------------------------------------------------------------|
| Yes                           | 269 (18.97%)  | 4.12 (3.01-5.65)                                           | 3.68 (2.64-5.14)                                            | 1.39 (1.00-1.94)                                                 | 1.40 (0.94-2.09)                                                  |
| <b>Difficulties with pets</b> |               |                                                            |                                                             |                                                                  |                                                                   |
| No                            | 1522 (97.46%) | 1.00                                                       | 1.00                                                        | 1.00                                                             | 1.00                                                              |
| Yes                           | 40 (2.54%)    | 2.79 (1.44-5.41)                                           | 2.52 (1.25-5.06)                                            | 0.90 (0.40-2.05)                                                 | 0.88 (0.36-2.17)                                                  |
| <b>Boredom</b>                |               |                                                            |                                                             |                                                                  |                                                                   |
| No                            | 1210 (75.06%) | 1.00                                                       | 1.00                                                        | 1.00                                                             | 1.00                                                              |
| Yes                           | 352 (24.94%)  | 2.88 (2.15-3.85)                                           | 2.69 (1.98-3.65-)                                           | 1.75 (1.28-2.39)                                                 | 1.55 (1.09-2.20)                                                  |

\* Adjusted for sex, age, education, marital status, rank, service

\*\* Adjusted for sex, age, education, marital status, rank, service and phase 3 GHQ or AUDIT-8 as appropriate

STROBE Statement—Checklist of items that should be included in reports of *cohort studies*

|                              | Item No | Recommendation                                                                                                                                                                                                                                                                                                         | Page No |
|------------------------------|---------|------------------------------------------------------------------------------------------------------------------------------------------------------------------------------------------------------------------------------------------------------------------------------------------------------------------------|---------|
| <b>Title and abstract</b>    | 1       | (a) Indicate the study's design with a commonly used term in the title or the abstract<br>(b) Provide in the abstract an informative and balanced summary of what was done and what was found                                                                                                                          | 1-2     |
| <b>Introduction</b>          |         |                                                                                                                                                                                                                                                                                                                        |         |
| Background/rationale         | 2       | Explain the scientific background and rationale for the investigation being reported                                                                                                                                                                                                                                   | 3       |
| Objectives                   | 3       | State specific objectives, including any prespecified hypotheses                                                                                                                                                                                                                                                       | 3       |
| <b>Methods</b>               |         |                                                                                                                                                                                                                                                                                                                        |         |
| Study design                 | 4       | Present key elements of study design early in the paper                                                                                                                                                                                                                                                                | 4       |
| Setting                      | 5       | Describe the setting, locations, and relevant dates, including periods of recruitment, exposure, follow-up, and data collection                                                                                                                                                                                        | 4-5     |
| Participants                 | 6       | (a) Give the eligibility criteria, and the sources and methods of selection of participants. Describe methods of follow-up<br>(b) For matched studies, give matching criteria and number of exposed and unexposed                                                                                                      | 4-5     |
| Variables                    | 7       | Clearly define all outcomes, exposures, predictors, potential confounders, and effect modifiers. Give diagnostic criteria, if applicable                                                                                                                                                                               | 4-5     |
| Data sources/<br>measurement | 8*      | For each variable of interest, give sources of data and details of methods of assessment (measurement). Describe comparability of assessment methods if there is more than one group                                                                                                                                   | 4-5     |
| Bias                         | 9       | Describe any efforts to address potential sources of bias                                                                                                                                                                                                                                                              | 5       |
| Study size                   | 10      | Explain how the study size was arrived at                                                                                                                                                                                                                                                                              | 4       |
| Quantitative variables       | 11      | Explain how quantitative variables were handled in the analyses. If applicable, describe which groupings were chosen and why                                                                                                                                                                                           | 5       |
| Statistical methods          | 12      | (a) Describe all statistical methods, including those used to control for confounding<br>(b) Describe any methods used to examine subgroups and interactions<br>(c) Explain how missing data were addressed<br>(d) If applicable, explain how loss to follow-up was addressed<br>(e) Describe any sensitivity analyses | 5       |
| <b>Results</b>               |         |                                                                                                                                                                                                                                                                                                                        |         |
| Participants                 | 13*     | (a) Report numbers of individuals at each stage of study—eg numbers potentially eligible, examined for eligibility, confirmed eligible, included in the study, completing follow-up, and analysed<br>(b) Give reasons for non-participation at each stage<br>(c) Consider use of a flow diagram                        | 5       |
| Descriptive data             | 14*     | (a) Give characteristics of study participants (eg demographic, clinical, social) and information on exposures and potential confounders<br>(b) Indicate number of participants with missing data for each variable of interest<br>(c) Summarise follow-up time (eg, average and total amount)                         | 5-6     |
| Outcome data                 | 15*     | Report numbers of outcome events or summary measures over time                                                                                                                                                                                                                                                         | 6-7     |

|    |                          |    |                                                                                                                                                                                                              |       |
|----|--------------------------|----|--------------------------------------------------------------------------------------------------------------------------------------------------------------------------------------------------------------|-------|
| 1  | Main results             | 16 | (a) Give unadjusted estimates and, if applicable, confounder-adjusted estimates and their precision (eg, 95% confidence interval). Make clear which confounders were adjusted for and why they were included | 6-10  |
| 2  |                          |    |                                                                                                                                                                                                              |       |
| 3  |                          |    | (b) Report category boundaries when continuous variables were categorized                                                                                                                                    |       |
| 4  |                          |    | (c) If relevant, consider translating estimates of relative risk into absolute risk for a meaningful time period                                                                                             |       |
| 5  | Other analyses           | 17 | Report other analyses done—eg analyses of subgroups and interactions, and sensitivity analyses                                                                                                               | 10    |
| 6  |                          |    |                                                                                                                                                                                                              |       |
| 7  |                          |    |                                                                                                                                                                                                              |       |
| 8  |                          |    |                                                                                                                                                                                                              |       |
| 9  |                          |    |                                                                                                                                                                                                              |       |
| 10 |                          |    |                                                                                                                                                                                                              |       |
| 11 | <b>Discussion</b>        |    |                                                                                                                                                                                                              |       |
| 12 | Key results              | 18 | Summarise key results with reference to study objectives                                                                                                                                                     | 11    |
| 13 | Limitations              | 19 | Discuss limitations of the study, taking into account sources of potential bias or imprecision. Discuss both direction and magnitude of any potential bias                                                   | 13    |
| 14 |                          |    |                                                                                                                                                                                                              |       |
| 15 | Interpretation           | 20 | Give a cautious overall interpretation of results considering objectives, limitations, multiplicity of analyses, results from similar studies, and other relevant evidence                                   | 11-12 |
| 16 |                          |    |                                                                                                                                                                                                              |       |
| 17 | Generalisability         | 21 | Discuss the generalisability (external validity) of the study results                                                                                                                                        | 13    |
| 18 |                          |    |                                                                                                                                                                                                              |       |
| 19 |                          |    |                                                                                                                                                                                                              |       |
| 20 |                          |    |                                                                                                                                                                                                              |       |
| 21 | <b>Other information</b> |    |                                                                                                                                                                                                              |       |
| 22 | Funding                  | 22 | Give the source of funding and the role of the funders for the present study and, if applicable, for the original study on which the present article is based                                                | 14    |
| 23 |                          |    |                                                                                                                                                                                                              |       |
| 24 |                          |    |                                                                                                                                                                                                              |       |
| 25 |                          |    |                                                                                                                                                                                                              |       |

\*Give information separately for exposed and unexposed groups.

**Note:** An Explanation and Elaboration article discusses each checklist item and gives methodological background and published examples of transparent reporting. The STROBE checklist is best used in conjunction with this article (freely available on the Web sites of PLoS Medicine at <http://www.plosmedicine.org/>, Annals of Internal Medicine at <http://www.annals.org/>, and Epidemiology at <http://www.epidem.com/>). Information on the STROBE Initiative is available at <http://www.strobe-statement.org>.

# BMJ Open

## UK Veterans' mental health and wellbeing before and during the COVID-19 pandemic: A longitudinal cohort study

|                                 |                                                                                                                                                                                                                                                                                                                                                                                                                                                                                                                                                                                                                                                                                                                                                   |
|---------------------------------|---------------------------------------------------------------------------------------------------------------------------------------------------------------------------------------------------------------------------------------------------------------------------------------------------------------------------------------------------------------------------------------------------------------------------------------------------------------------------------------------------------------------------------------------------------------------------------------------------------------------------------------------------------------------------------------------------------------------------------------------------|
| Journal:                        | <i>BMJ Open</i>                                                                                                                                                                                                                                                                                                                                                                                                                                                                                                                                                                                                                                                                                                                                   |
| Manuscript ID                   | bmjopen-2021-049815.R2                                                                                                                                                                                                                                                                                                                                                                                                                                                                                                                                                                                                                                                                                                                            |
| Article Type:                   | Original research                                                                                                                                                                                                                                                                                                                                                                                                                                                                                                                                                                                                                                                                                                                                 |
| Date Submitted by the Author:   | 02-Aug-2021                                                                                                                                                                                                                                                                                                                                                                                                                                                                                                                                                                                                                                                                                                                                       |
| Complete List of Authors:       | Sharp, Marie-Louise; King's College London, Psychological Medicine<br>Serfioti, Danai; King's College London, Psychological Medicine<br>Jones, Margaret; King's College London, Psychological Medicine<br>Burdett, Howard; King's College London, Psychological Medicine<br>Pernet, David; King's College London, Psychological Medicine<br>Hull, Lisa; King's College London, Psychological Medicine<br>Murphy, Dominic; King's College London, Psychological Medicine;<br>Combat Stress<br>Wessely, Simon; King's College London, Psychological Medicine<br>Fear, Nicola; King's College London, Psychological Medicine; King's<br>Centre for Military Health Research Academic Department of Military<br>Mental Health, Psychological Medicine |
| <b>Primary Subject Heading</b>: | Epidemiology                                                                                                                                                                                                                                                                                                                                                                                                                                                                                                                                                                                                                                                                                                                                      |
| Secondary Subject Heading:      | Mental health, Occupational and environmental medicine                                                                                                                                                                                                                                                                                                                                                                                                                                                                                                                                                                                                                                                                                            |
| Keywords:                       | COVID-19, EPIDEMIOLOGY, MENTAL HEALTH                                                                                                                                                                                                                                                                                                                                                                                                                                                                                                                                                                                                                                                                                                             |
|                                 |                                                                                                                                                                                                                                                                                                                                                                                                                                                                                                                                                                                                                                                                                                                                                   |

SCHOLARONE™  
Manuscripts





I, the Submitting Author has the right to grant and does grant on behalf of all authors of the Work (as defined in the below author licence), an exclusive licence and/or a non-exclusive licence for contributions from authors who are: i) UK Crown employees; ii) where BMJ has agreed a CC-BY licence shall apply, and/or iii) in accordance with the terms applicable for US Federal Government officers or employees acting as part of their official duties; on a worldwide, perpetual, irrevocable, royalty-free basis to BMJ Publishing Group Ltd ("BMJ") its licensees and where the relevant Journal is co-owned by BMJ to the co-owners of the Journal, to publish the Work in this journal and any other BMJ products and to exploit all rights, as set out in our [licence](#).

The Submitting Author accepts and understands that any supply made under these terms is made by BMJ to the Submitting Author unless you are acting as an employee on behalf of your employer or a postgraduate student of an affiliated institution which is paying any applicable article publishing charge ("APC") for Open Access articles. Where the Submitting Author wishes to make the Work available on an Open Access basis (and intends to pay the relevant APC), the terms of reuse of such Open Access shall be governed by a Creative Commons licence – details of these licences and which [Creative Commons](#) licence will apply to this Work are set out in our licence referred to above.

Other than as permitted in any relevant BMJ Author's Self Archiving Policies, I confirm this Work has not been accepted for publication elsewhere, is not being considered for publication elsewhere and does not duplicate material already published. I confirm all authors consent to publication of this Work and authorise the granting of this licence.

# UK Veterans' mental health and wellbeing before and during the COVID-19 pandemic: A longitudinal cohort study

Marie-Louise Sharp\*: King's Centre for Military Health Research, Department of Psychological Medicine, King's College London, Weston Education Centre, 10 Cutcombe Road, London, UK  
Correspondence: [marie-louise.sharp@kcl.ac.uk](mailto:marie-louise.sharp@kcl.ac.uk)

Danai Serfioti\*: King's Centre for Military Health Research, Department of Psychological Medicine, King's College London, London, UK.

Margaret Jones: King's Centre for Military Health Research, Department of Psychological Medicine, King's College London, London, UK.

Howard Burdett: King's Centre for Military Health Research, Department of Psychological Medicine, King's College London, London, UK.

David Pernet: King's Centre for Military Health Research, Department of Psychological Medicine, King's College London, London, UK.

Lisa Hull: King's Centre for Military Health Research, Department of Psychological Medicine, King's College London, London, UK.

Dominic Murphy: King's Centre for Military Health Research, Department of Psychological Medicine, King's College London, London; Combat Stress, Research Department, Tyrwhitt House, Leatherhead, Surrey, UK.

Simon Wessely: King's Centre for Military Health Research, Department of Psychological Medicine, King's College London, London, UK.

Nicola T Fear: Academic Department of Military Mental Health and King's Centre for Military Health Research, Department of Psychological Medicine, King's College London, London, UK.

\*Joint First Authors

Word Count: 3949

## ABSTRACT

**Objectives:** To investigate the impact of the COVID-19 pandemic on the health and wellbeing of UK ex-service personnel (veterans) before and during the pandemic, and to assess associations of COVID-19 experiences and stressors with mental health, alcohol use and loneliness.

**Design:** An additional wave of data was collected from a longitudinal cohort study of the UK Armed Forces.

**Setting:** Online survey June-September 2020

**Participants:** Cohort members were included if they had completed a questionnaire at phase three of the KCMHR health and wellbeing study (2014-2016), had left the Armed Forces after Regular service, were living in the UK, had consented to follow up, and provided a valid email address. Invitation emails were sent to N=3547 with a 44% response rate (n=1562).

**Primary outcome measures:** Common mental health disorders (CMD) (measured using the General Health Questionnaire, 12 items – cut off  $\geq 4$ ), hazardous alcohol use (measured using the AUDIT, 10 items – cut off  $\geq 8$ ) and loneliness (UCLA-3 loneliness scale – cut off  $\geq 6$ ).

**Results:** Veterans reported a statistically significant decrease in hazardous drinking of 48.5% to 27.6%, whilst CMD remained stable (non-statistically significant increase of 24.5% to 26.1%). 27.4% of veterans reported feelings of loneliness. The COVID-19 stressors of reporting difficulties with family/social relationships, boredom, and difficulties with health, were statistically significantly associated with CMD, hazardous drinking and loneliness, even after adjustment for previous mental health/hazardous alcohol use.

**Conclusions:** Our study suggests a COVID-19 impact on veterans' mental health, alcohol use and loneliness, particularly for those experiencing difficulties with family relationships. Veterans experienced the pandemic in similar ways to the general population and in some cases may have responded in resilient ways. Whilst stable levels of CMD and reduction in alcohol use are positive, there remains a group of veterans that may need mental health and alcohol treatment services.

## Strengths and Limitations of this Study

- Recruitment from a longitudinal cohort study where underlying characteristics are known.
- Rapid roll-out and use of validated measures for mental health and wellbeing outcomes aligned with our previous health and wellbeing study and other UK general population studies' measures.
- Only generalisable to veterans who were in military service during the Iraq/Afghanistan era.
- The study is limited to the context of the COVID-19 pandemic in the UK, June-September 2020.

## INTRODUCTION

The COVID-19 pandemic has led to large-scale societal changes all over the world, with governments implementing strict controls on movement and substantial restrictions to people's personal and work lives [1]. Despite the benefits to public health of containment strategies such as 'lockdown', self-isolation and social distancing (e.g., slower spread of infection), the social, economic, wellbeing and health consequences are likely to be profound [2, 3] and felt in the short, medium and long term.

The uncertainty and unpredictable nature of the COVID-19 pandemic has had a general negative impact on psychological and mental health [4]. The impact of COVID-19 is not uniform. Vulnerable groups, such as the elderly, young, females, people with mental or physical ill health or on low income are at greater risk of social isolation and worse health outcomes [2]. The analysis of longitudinal data from the UK Household Longitudinal Study (UKHLS), also known as 'Understanding Society' study indicated that mental health in the UK worsened substantially from prior wave 9 data collected January 2017-May 2019 with increased GHQ scores of 10.8% on average in April 2020, and worse scores in wave 9 data for individuals with pre-existing mental health difficulties [5]. Longitudinal data from the Office for National Statistics (ONS) also reports that there has been a deterioration in mental health of the general population in Great Britain with 19.2% of adults reporting depression in June 2020 compared to 9.7% before the pandemic July 2019-March 2020 [6].

In Great Britain, there are an estimated 2.4 million ex-Service personnel (veterans) making up 5% of household residents aged 16 years and over [7]. It is currently unknown how UK veterans may experience the pandemic and the consequent effect on their health and wellbeing. Individuals with anxiety related disorders (e.g., anxiety or post-traumatic stress disorder (PTSD)) appear to be at higher risk of experiencing psychological distress during the ongoing pandemic [8]. A proportion of the veteran population show increased risk of mental and physical health issues and barriers to help-seeking [9, 10], and there has been some evidence of an increase in the number of wounded veterans who have struggled with their mental and physical health since the start of lockdown in the UK [11]. Loneliness and social isolation are recognised problems for society in general, but ex-Service personnel present with unique experiences of loneliness and social isolation, which for some can be linked to their poor re-integration into civilian life and the community [12, 13]. A study exploring how New Zealand veterans conceptualised loneliness during COVID-19 lockdown indicated that both social and physical isolation and health-related factors were significant drivers of loneliness [14]. However, in contrast to the general population (excluding emergency responders), military personnel are trained to demonstrate readiness and resilience in the face of warfare operations and stressful environments [15]. Therefore, it is unknown whether veteran's military training may also create resilient responses in the face of COVID-19 uncertainties compared to the general population.

The circumstances created by the COVID-19 pandemic may require a reconsideration of how healthcare and systems of support should be adapted to effectively accommodate the needs of the ex-Service population, especially the most vulnerable within this population [16]. The current study (Veterans-CHECK) aims to investigate the impact of the COVID-19 pandemic on the health and wellbeing of UK veterans, assessing mental health and alcohol use before and during the pandemic.

1  
2  
3 It will measure veterans reports of loneliness during the pandemic and it will also assess the impact  
4 of COVID-19 experiences and stressors on mental health, hazardous alcohol use and loneliness  
5 outcomes. Understanding this impact will be important to the Government, Armed Forces charities,  
6 and other stakeholders to target services and support and ensure current policy initiatives are fit for  
7 purpose in the context of the pandemic.  
8  
9

## 10 11 METHOD

### 12 13 Study design and participants

14  
15 Participants were recruited from the Kings Centre for Military Health Research (KCMHR) health and  
16 wellbeing survey. This is a large-scale ongoing investigation of the physical and mental health and  
17 wellbeing of UK Armed Forces personnel from all three services (regulars and reservists) and  
18 includes personnel who were first surveyed before the recent conflicts in Iraq [17], as well as during  
19 and after the conflicts in Iraq and Afghanistan. There have been three phases of data collection,  
20 Phase 1: 2004 - 2006, Phase 2: 2007 - 2009 and Phase 3: 2014 - 2016 [9, 18, 19]. Approximately  
21 18,000 have taken part in the survey since it began. Individuals were invited to take part in the  
22 Veterans-CHECK study if: they had completed a questionnaire at Phase 3 of the health and wellbeing  
23 study, had left the UK Armed Forces, had regular service, were living in the UK, had consented to  
24 follow up and provided a valid email address. Invitation emails were sent to N=3547 of individuals  
25 who met this eligibility criteria.  
26  
27  
28  
29  
30

### 31 32 Procedure

33  
34 Data collection was conducted online. Participants were asked to complete a questionnaire in their  
35 personal settings through REDCap, a secure web application for building and managing online  
36 surveys and databases [20]. Consents were completed online on the REDCap platform. The  
37 questionnaire had sections including (a) socio-demographics (b) COVID-19 experiences and stressors  
38 (c) current mental health and wellbeing measures. A full description of the study protocol is  
39 available on line Sharp, Serfioti [21].  
40  
41

42  
43 The COVID-19 experiences and stressors section included self-report of having COVID-19 (those who  
44 indicated a positive PCR test or reported they had 'probably' had COVID-19 were counted as having  
45 COVID-19 for analysis purposes), experiencing isolation, bereavement and other challenges, such as  
46 childcare arrangements and caring responsibilities during the pandemic. Participants were asked  
47 about employment changes since the start of the pandemic with two categories created of 'no  
48 change/furlough' and 'change for worse' which included those that reported unemployment,  
49 redundancy or reductions in salary. Individuals were asked whether they had experienced COVID-19  
50 stressors in the past month, followed by a list of stressors they could endorse pertaining to finances,  
51 health and other difficulties. Education and military background information were taken from Phase  
52 3 of the cohort study [9] (rank, service branch, length of service). A variable of 'financial difficulties'  
53 was constructed using three items from the list of COVID-19 stressors. Experiencing at least one of  
54 'Another bill-payer in your household lost their job or was unable to earn money', 'Unable to pay  
55 bills', 'other financial difficulties' was categorised as experiencing 'financial difficulties'. Symptoms of  
56 common mental health disorders (CMD) were measured using the 12-item General Health  
57 Questionnaire (GHQ-12), cut-off scores for case status used were 4 or more (scores range from 0 to  
58  
59  
60

1  
2  
3 12) [22]; 10-item Alcohol Use Disorder Identification Test (AUDIT) was used to measure alcohol use,  
4 cut off scores of 8 or more were used for hazardous drinking (scores range from 0 to 40), and 16 or  
5 more defined as alcohol misuse (which is likely to be harmful to health) [23], AUDIT-C score of 5 or  
6 more indicating risky drinking [24]; and the 3-item UCLA Loneliness Scale to measure feelings of  
7 loneliness with a cut off of 6 or more (scores range from 3 to 9 [25]).  
8  
9

## 10 11 Data Collection

12  
13 One invitation email was sent to participants in June 2020 with up to three email reminders sent in  
14 June, July and August 2020, with data collection closing at the end of September 2020.  
15  
16

## 17 Analyses

18  
19 To calculate response weights, we utilised social and military demographic data collected at previous  
20 phases of the KCMHR cohort study including sex, age, education level, rank (most recent when  
21 serving), service branch, marital status, role when serving (combat/support), cohort sample  
22 (sampled originally at phases 1, 2 or 3). We constructed a binary response variable such that 0 = did  
23 not respond and 1 = responded. We carried out univariable logistic regression to determine which of  
24 these demographic/military variables was statistically associated with response at the  $p < 0.05$   
25 level. The variables found to be associated were entered into a multivariable logistic model. The  
26 probability of responding given these characteristics was ascertained, and response weights  
27 calculated as the inverse of the probability of responding. The variables in the final response weights  
28 model were age, sex, rank, service branch, education level and cohort sample.  
29  
30  
31  
32

33 The sociodemographic and military characteristics of the sample were described. Mental health and  
34 alcohol use during COVID-19 were compared with previous mental health and alcohol use from  
35 phase three of our health and wellbeing survey [9]. Logistic regression analyses were conducted to  
36 assess the associations between the outcomes of interest (CMD, hazardous drinking and loneliness)  
37 and COVID-19 experiences and stressors. Logistic regression analyses were adjusted for sex, age,  
38 education, marital status, rank and service. Further analyses were adjusted additionally for previous  
39 CMD or hazardous drinking status at phase three of our health and wellbeing study. All statistical  
40 analyses were performed using the statistical package, Stata (version 16.0 [26]), with survey  
41 commands used to account for weighting. Weighted percentages and odds ratios are presented in  
42 tables to account for response weights, together with unweighted cell counts.  
43  
44  
45  
46  
47

## 48 Ethical Approval

49 Full ethical approval was obtained from the King's College London Research Ethics Committee (Ref:  
50 HR-19/20-18626).  
51  
52  
53

## 54 Patient and public involvement

55 Veterans who sit on our research board provided feedback on the content and flow of the  
56 questionnaire; the questionnaire was amended and refined accordingly. Findings from the study will  
57 be disseminated to study participants through a newsletter, social media outlets and our  
58 stakeholders that represent veteran communities.  
59  
60

## RESULTS

The response rate was 44% (1562/3547). Responders were more likely to be older, officers, of higher educational status, have served in the RAF, were less likely to have reported alcohol misuse, but more likely to have reported multiple physical symptoms, and poor/fair health at phase 3 of the cohort (Supplemental Information Table 1). Table 1 describes the socio-demographic and military characteristics of those who participated in the study. The majority of participants were male, Non-Commissioned Officers (NCO), had served in the Army, were educated to A-Level or degree level and in a relationship. Over half the sample had left service 10 or more years ago and the majority were in employment before the pandemic. The majority of respondents lived in England (85.8%, n=1334).

**Table 1 – Socio-demographic and military characteristics of sample (N=1562)**

\*percentages are weighted with unweighted cell counts

| Characteristic                                                   | n (%) *       |
|------------------------------------------------------------------|---------------|
| <b>Sex</b>                                                       |               |
| male                                                             | 1383 (89.26%) |
| female                                                           | 179 (10.74%)  |
| <b>Age band (years at completion of Veterans-CHECK survey)</b>   |               |
| 25-34                                                            | 46 (6.65%)    |
| 35-44                                                            | 272 (22.97%)  |
| 45-54                                                            | 554 (35.93%)  |
| 55-64                                                            | 514 (26.95%)  |
| 65 and over                                                      | 176 (7.50%)   |
| <b>Rank (when in service)</b>                                    |               |
| Officer                                                          | 478 (26.11%)  |
| NCO                                                              | 954 (61.45%)  |
| Other rank                                                       | 130 (12.44%)  |
| <b>Service (when in service)</b>                                 |               |
| Royal Navy                                                       | 290 (19.27%)  |
| Army                                                             | 873 (58.26%)  |
| RAF                                                              | 399 (22.47%)  |
| <b>Length of time since leaving service</b>                      |               |
| Within last year                                                 | 20 (1.28%)    |
| One year up to five years                                        | 166 (12.62%)  |
| Five years up to 10 years                                        | 506 (33.86%)  |
| More than 10 years                                               | 870 (52.24%)  |
| <b>Education level (reported at Phase 3 of the cohort study)</b> |               |
| No qualifications/O-levels/GCSEs                                 | 385 (27.23%)  |
| A-level                                                          | 506 (33.91%)  |
| Degree                                                           | 671 (38.86%)  |
| <b>Relationship status (current)</b>                             |               |
| In a relationship                                                | 1361 (86.76%) |



|                                                             |               |
|-------------------------------------------------------------|---------------|
| Single                                                      | 72 (5.67%)    |
| Ex-relationship<br>(separated, divorced, widowed)           | 127 (7.57%)   |
| <b>Employment status (before the<br/>COVID-19 pandemic)</b> |               |
| Employed                                                    | 1246 (83.41%) |
| Retired                                                     | 232 (11.18%)  |
| Economically inactive                                       | 78 (5.41%)    |

### Before and during COVID-19 pandemic - mental health and alcohol use

Overall, the percentage of participants meeting the threshold for CMD remained stable from pre-pandemic levels, increasing only slightly from 24.5% (n=354) to 26.1% (n=376), where this increase was not statistically significant (Table 2). All measures of alcohol use were statistically significant reductions from pre-pandemic levels. Veterans reported hazardous drinking reductions from 48.5% (n=642) to 27.6% (n=367), alcohol misuse reductions of 9.2% (n=119) to 3.7% (n=50) and high-risk consumption reductions of 73.0% (n=987) to 49.2% (n=649). In further analysis (available upon request) women veterans in the sample reported similar trends as male veterans mirroring the stability in CMD levels and statistically significant reductions in alcohol use.

**Table 2 – Pre and during pandemic mental health and alcohol use outcomes**

\*percentages are weighted

|                                                     | <b>Before COVID-19</b><br>Phase 3<br>(2014-2016)<br>N (%)* | <b>During COVID-19</b><br>Vet-CHECK<br>(June-Sept 2020)<br>N (%) | P value** |
|-----------------------------------------------------|------------------------------------------------------------|------------------------------------------------------------------|-----------|
| <b>Common Mental Disorders</b><br>(GHQ-12 $\geq$ 4) | 354 /1539 (24.50%)                                         | 373/1539 (26.10%)                                                | 0.276     |
| <b>Hazardous Drinking</b><br>(AUDIT Case 8 $\geq$ ) | 642/1387 (48.48%)                                          | 360/1387 (27.61%)                                                | <0.0001   |
| <b>Alcohol Misuse</b><br>(AUDIT Case 16 $\geq$ )    | 119/1387 (9.19%)                                           | 48/1387 (3.71%)                                                  | <0.0001   |
| <b>Alcohol Consumption</b><br>AUDIT-C ( $\geq$ 5)   | 987/1366 (73.01%)                                          | 649/1366 (49.24%)                                                | <0.0001   |

\*\*Adjusted Wald test

### Loneliness, COVID-19 experiences and stressors

27.4% (n=395) of the sample reported feelings of loneliness. Tables 3 and 4 describe COVID-19 experiences and stressors. 14.8% (n=226) of the sample reported definitely or probably having COVID-19, with 16.5% (n=249) of the sample having to self-isolate. 18.5% (n=286) of the sample knew someone who died from COVID-19. The large majority of the sample had no change in employment or were furloughed (91.6%, n=1425). Just under half of the sample reported being key workers (46.2%, n=674), with 19% (n=131) of these key workers being health and social care key workers.

1  
2  
3 The large majority of the sample lived with their spouse/partner (84.6%, n=1328). Just under a  
4 quarter of the sample were responsible for two or more children under the age of 18 years old  
5 (24.2%, n=320). Just under half of those who had children they were responsible for had to change  
6 childcare arrangements because of the pandemic (47.6%, n=214) and 44.7% (n=94) reported the  
7 change in childcare arrangements had a negative impact on their life. 17.9% (n=271) reported extra  
8 or new caring responsibilities because of the pandemic. The most frequently reported COVID-19  
9 stressors were boredom (24.9%, n=352), having to change or delay major plans (23.7%, n=364) and  
10 difficulties with family/other social relationships (19.5%, n=278).  
11  
12  
13  
14

## 15 Association of mental health outcomes and COVID-19 experiences and stressors

16 Table 3 and 4 presents odds ratios (AOR) for the association between CMD symptoms, hazardous  
17 drinking and loneliness adjusted for sex, age, education, marital status, rank and Service.  
18  
19

### 20 *Common Mental Disorders*

21 Increased odds of reporting symptoms of CMD was associated with self-report of definitely or  
22 probably having COVID-19, knowing someone who died from COVID-19, reporting a change for  
23 worse in employment during the pandemic (compared to no change/furlough), not being a key  
24 worker, living alone, being responsible for two or more children under 18 years of age (compared to  
25 no children), having to change childcare arrangements because of the pandemic, having usual caring  
26 responsibilities (compared to none) or extra/new caring responsibilities because of the pandemic  
27 (Table 3). Increased odds of reporting CMD were associated with all COVID-19 stressors (Table 4).  
28 The stressors with the largest effect sizes included having difficulties with health, difficulties with  
29 family/other social relationships, work difficulties, and having financial problems.  
30  
31  
32  
33  
34  
35

### 36 *Hazardous Drinking*

37 Increased likelihood of reporting drinking at hazardous levels was associated with having difficulties  
38 with health, difficulties with family/other social relationships, and experiencing boredom.  
39  
40  
41

### 42 *Loneliness*

43 Increased reporting of loneliness was associated with knowing someone who died from COVID-19,  
44 being a health and social care key worker (compared to other key workers), living alone, being  
45 responsible for one or two or more children (compared to none), and having usual caring  
46 responsibilities (compared to none) (Table 3). Increased reporting of loneliness was associated with  
47 several COVID-19 stressors (Table 4), the largest effect sizes were reporting difficulties with  
48 family/other social relationships, difficulties with health, and experiencing boredom.  
49  
50  
51

52 **Table 3 – Association between CMD, Hazardous drinking and Loneliness and COVID-19 experiences**  
53 (Weighted percentages and odds ratios are presented in tables to account for response weights,  
54 together with unweighted cell counts.)  
55

56 \*Adjusted for sex, age, education, marital status, rank, service  
57  
58  
59  
60

| COVID-19 Experiences                                       | n (%)         | Common Mental Disorders (CMD) (AOR 95% CI) *<br>N = 376<br>(25.97%) | Hazardous drinking (AUDIT ≥8) (AOR 95% CI) *<br>N = 367<br>(27.82%) | Loneliness (AOR 95% CI) *<br>N = 395<br>(27.42%) |
|------------------------------------------------------------|---------------|---------------------------------------------------------------------|---------------------------------------------------------------------|--------------------------------------------------|
| <b>Had or have COVID-19</b>                                |               |                                                                     |                                                                     |                                                  |
| No                                                         | 866 (53.80%)  | 1.00                                                                | 1.00                                                                | 1.00                                             |
| Yes (definitely/probably)                                  | 226 (14.83%)  | 1.55 (1.08-2.22)                                                    | 0.80 (0.55-1.16)                                                    | 1.36 (0.96-1.95)                                 |
| Don't know                                                 | 470 (31.37%)  | 1.06 (0.79-1.43)                                                    | 0.78 (0.58-1.05)                                                    | 1.24 (0.93-1.66)                                 |
| <b>Had to isolate</b>                                      |               |                                                                     |                                                                     |                                                  |
| No                                                         | 1310 (83.51%) | 1.00                                                                | 1.00                                                                |                                                  |
| Yes                                                        | 249 (16.49%)  | 1.33 (0.96-1.85)                                                    | 0.89 (0.63-1.26)                                                    | 1.29 (0.93-1.79)                                 |
| <b>Know someone who died from COVID-19?</b>                |               |                                                                     |                                                                     |                                                  |
| No                                                         | 1276 (81.52%) | 1.00                                                                | 1.00                                                                | 1.00                                             |
| Yes                                                        | 286 (18.48%)  | 1.76 (1.29-2.40)                                                    | 0.95 (0.68-1.33)                                                    | 1.54 (1.13-2.12)                                 |
| <b>Change in employment</b>                                |               |                                                                     |                                                                     |                                                  |
| no change or furlough                                      | 1425 (91.60%) | 1.00                                                                | 1.00                                                                | 1.00                                             |
| change for worse                                           | 134 (8.40%)   | 3.14 (2.15-4.60)                                                    | 1.26 (0.82-1.93)                                                    | 1.49 (0.98-2.29)                                 |
| <b>Key Worker</b>                                          |               |                                                                     |                                                                     |                                                  |
| Not a key worker                                           | 880 (53.72%)  | 1.42 (1.06-1.89)                                                    | 1.09 (0.81-1.45)                                                    | 1.23 (0.92-1.65)                                 |
| Key worker – Health and social care                        | 131 (8.79%)   | 1.40 (0.85-2.31)                                                    | 0.81 (0.47-1.38)                                                    | 1.69 (1.05-2.70)                                 |
| Key workers - All other roles                              | 543 (37.48%)  | 1.00                                                                | 1.00                                                                | 1.00                                             |
| <b>Who usually live with</b>                               |               |                                                                     |                                                                     |                                                  |
| Live alone                                                 | 170 (11.04%)  | 2.11 (1.07-4.16)                                                    | 1.56 (0.82-2.96)                                                    | 2.49 (1.36-4.57)                                 |
| Live with spouse/partner                                   | 1328 (84.55%) | 1.00                                                                | 1.00                                                                | 1.00                                             |
| Live with others                                           | 59 (4.41%)    | 1.59 (0.55-4.60)                                                    | 0.95 (0.35-2.59)                                                    | 1.60 (0.71-3.61)                                 |
| <b>Children</b>                                            |               |                                                                     |                                                                     |                                                  |
| Have no children                                           | 357 (24.50%)  | 1.00                                                                | 1.00                                                                | 1.00                                             |
| Have children but not responsible for them                 | 666 (36.04%)  | 1.14 (0.78-1.67)                                                    | 0.93 (0.64-1.36)                                                    | 1.17 (0.79-1.73)                                 |
| Responsible for one child under 18 years old               | 214 (15.23%)  | 0.87 (0.53-1.41)                                                    | 0.92 (0.59-1.44)                                                    | 1.62 (1.03-2.55)                                 |
| Responsible for two or more children under 18 years of age | 320 (24.23%)  | 1.56 (1.03-2.37)                                                    | 0.87 (0.57-1.33)                                                    | 1.94 (1.26-3.00)                                 |
| <b>Changed childcare arrangements</b>                      |               |                                                                     |                                                                     |                                                  |
| No                                                         | 243 (52.40%)  | 1.00                                                                | 1.00                                                                | 1.00                                             |
| Yes                                                        | 214 (47.60%)  | 2.31 (1.47-3.64)                                                    | 1.15 (0.73-1.84)                                                    | 1.00 (0.63-1.57)                                 |
| <b>Impact of changed childcare arrangements</b>            |               |                                                                     |                                                                     |                                                  |
| Positive impact                                            | 33 (14.08%)   | 0.60 (0.21-1.67)                                                    | 1.16 (0.45-3.00)                                                    | 0.59 (0.18-1.93)                                 |
| Negative impact                                            | 94 (44.73%)   | 1.96 (0.99-3.89)                                                    | 1.39 (0.68-2.85)                                                    | 1.66 (0.78-3.52)                                 |

|                                                             |               |                  |                  |                  |
|-------------------------------------------------------------|---------------|------------------|------------------|------------------|
| Neutral impact                                              | 87 (41.19%)   | 1.00             | 1.00             | 1.00             |
| <b>Usual caring responsibilities (pre pandemic)</b>         |               |                  |                  |                  |
| No                                                          | 1361 (87.55%) | 1.00             | 1.00             | 1.00             |
| yes                                                         | 195 (12.45%)  | 1.74 (1.20-2.53) | 0.79 (0.52-1.21) | 1.63 (1.11-2.40) |
| <b>Extra or new caring responsibilities during pandemic</b> |               |                  |                  |                  |
| No                                                          | 1285 (82.10%) | 1.00             | 1.00             | 1.00             |
| yes                                                         | 271 (17.90%)  | 1.77 (1.29-2.43) | 1.01 (0.71-1.42) | 1.35 (0.97-1.87) |

**Table 4 – Association between CMD, Hazardous drinking and Loneliness and COVID-19 stressors**  
(Weighted percentages and odds ratios are presented in tables to account for response weights, together with unweighted cell counts.)

\* Adjusted for sex, age, education, marital status, rank, service

| COVID-19 Stressors                          | n (%)         | Common Mental Disorders (CMD) (AOR 95% CI) *<br>N = 376<br>(25.97%) | Hazardous drinking (AUDIT ≥8) (AOR 95% CI) *<br>N = 367<br>(27.82%) | Loneliness (AOR 95% CI) *<br>N = 395<br>(27.42%) |
|---------------------------------------------|---------------|---------------------------------------------------------------------|---------------------------------------------------------------------|--------------------------------------------------|
| <b>Financial problems</b>                   |               |                                                                     |                                                                     |                                                  |
| No                                          | 1379 (86.96%) | 1.00                                                                | 1.00                                                                | 1.00                                             |
| yes                                         | 183 (13.04%)  | 2.93 (2.06-4.15)                                                    | 1.04 (0.69-1.57)                                                    | 1.75 (1.20-2.56)                                 |
| <b>Had difficulty accessing enough food</b> |               |                                                                     |                                                                     |                                                  |
| No                                          | 1533 (97.91%) | 1.00                                                                | 1.00                                                                | 1.00                                             |
| Yes                                         | 29 (2.09%)    | 3.10 (1.35-7.16)                                                    | 1.64 (0.70-3.82)                                                    | 3.91 (1.57-9.73)                                 |
| <b>Had difficulty accessing medication</b>  |               |                                                                     |                                                                     |                                                  |
| No                                          | 1490 (94.86%) | 1.00                                                                | 1.00                                                                | 1.00                                             |
| Yes                                         | 72 (5.14%)    | 2.32 (1.34-4.02)                                                    | 1.01 (0.52-1.95)                                                    | 3.48 (1.90-6.38)                                 |
| <b>Had difficulty with health</b>           |               |                                                                     |                                                                     |                                                  |
| No                                          | 1374 (87.49%) | 1.00                                                                | 1.00                                                                | 1.00                                             |
| Yes                                         | 188 (12.51%)  | 6.94 (4.91-9.83)                                                    | 1.73 (1.19-2.51)                                                    | 2.96 (2.07-4.22)                                 |
| <b>Had somebody close in hospital</b>       |               |                                                                     |                                                                     |                                                  |
| No                                          | 1460 (93.24%) | 1.00                                                                | 1.00                                                                | 1.00                                             |
| Yes                                         | 102 (6.76%)   | 2.40 (1.51-3.81)                                                    | 1.25 (0.76-2.07)                                                    | 1.33 (0.81-2.18)                                 |
| <b>Lost somebody close</b>                  |               |                                                                     |                                                                     |                                                  |
| No                                          | 1489 (94.90%) | 1.00                                                                | 1.00                                                                | 1.00                                             |
| Yes                                         | 73 (5.10%)    | 1.85 (1.06-3.22)                                                    | 0.63 (0.32-1.26)                                                    | 1.13 (0.64-2.01)                                 |
| <b>Had to change delay or major plan</b>    |               |                                                                     |                                                                     |                                                  |
| No                                          | 1198 (76.26%) | 1.00                                                                | 1.00                                                                | 1.00                                             |
| Yes                                         | 364 (23.74%)  | 2.50 (1.89-3.32)                                                    | 1.16 (0.85-1.57)                                                    | 1.88 (1.40-2.51)                                 |

|                                                            |               |                  |                  |                  |
|------------------------------------------------------------|---------------|------------------|------------------|------------------|
| <b>Difficulties with family/other social relationships</b> |               |                  |                  |                  |
| No                                                         | 1284 (80.53%) | 1.00             | 1.00             | 1.00             |
| Yes                                                        | 278 (19.47%)  | 5.29 (3.85-7.27) | 1.70 (1.22-2.36) | 4.01 (2.91-5.55) |
| <b>Difficulties with internet access</b>                   |               |                  |                  |                  |
| No                                                         | 1455 (92.95%) | 1.00             | 1.00             | 1.00             |
| Yes                                                        | 107 (7.05%)   | 1.84 (1.17-2.88) | 1.06 (0.65-1.72) | 2.28 (1.43-3.63) |
| <b>Work difficulties</b>                                   |               |                  |                  |                  |
| No                                                         | 1293 (81.03%) | 1.00             | 1.00             | 1.00             |
| Yes                                                        | 269 (18.97%)  | 4.12 (3.01-5.65) | 1.39 (1.00-1.94) | 2.35 (1.70-3.25) |
| <b>Difficulties with pets</b>                              |               |                  |                  |                  |
| No                                                         | 1522 (97.46%) | 1.00             | 1.00             | 1.00             |
| Yes                                                        | 40 (2.54%)    | 2.79 (1.44-5.41) | 0.90 (0.40-2.05) | 1.28 (0.63-2.59) |
| <b>Boredom</b>                                             |               |                  |                  |                  |
| No                                                         | 1210 (75.06%) | 1.00             | 1.00             | 1.00             |
| Yes                                                        | 352 (24.94%)  | 2.88 (2.15-3.85) | 1.75 (1.28-2.39) | 2.96 (2.21-3.96) |

### Adjusting for previous CMD and hazardous drinking

Adjusting for previous CMD or hazardous drinking case status reported at phase three of our health and wellbeing study attenuated the association of CMD and of hazardous drinking with COVID-19 experiences and stressors, but it did not change the direction of association, and the majority of associations remained significant at the 95% level (supplemental information Table 2). For four COVID-19 experiences or stressors, the associations become non-significant, yet their effect size remained large. These included the association of reporting CMD symptoms and living alone, difficulty access enough food, difficulty accessing medication, and losing someone close to you (supplemental information Table 2).

## DISCUSSION

Compared to pre-pandemic levels taken in 2014-2016, levels of CMDs in UK veterans remained stable. Veterans reported statistically significant reductions in levels of hazardous drinking during the pandemic compared to pre-pandemic levels. 27.4% reported feelings of loneliness. Just under 15% of people in the study self-reported definitely or probably having COVID-19. Half of individuals with children who they were responsible for reported that changes in childcare negatively affected their life and nearly a fifth of individuals had new or extra caring responsibilities because of the pandemic. The most common COVID-19 stressors reported were boredom, having to change major life plans, and difficulties with family or other social relationships. The COVID-19 stressors of difficulties with family or other social relationships, boredom and difficulties with health were all associated with veterans reporting CMD, hazardous drinking and loneliness. Adjustment for previous CMD or hazardous alcohol use did not change the direction of association and the majority of associations remained statistically significant. Our study identifies there may be a specific impact of COVID-19 experiences and stressors on veterans' CMD, alcohol use and loneliness outcomes.

1  
2  
3 CMD levels have remained stable with a small, statistically non-significant increase. This should be  
4 compared to population data showing significant increases in CMD in the general population. For  
5 example, ONS figures found a 9.5% increase in depression from the period July 2019-March 2020 to  
6 June 2020 [6]; The UKHLS reported a 7.6% increase in CMD between 2017-2019 and April 2020 [4].  
7 Veterans' pre-pandemic CMD levels were higher than the general population levels (Vet-CHECK  
8 Phase three 2014-2016: 24.5% v UKHLS 2018-2019: 18.9% [4]) but were similar during the pandemic  
9 (UK studies ranging from 26.0% to 30.6% [4, 27, 28]). The absence of a similarly large increase in  
10 CMD caseness in the veteran group may indicate resilient responses in this group who have been  
11 previously trained in readiness for deployments, resilience and coping strategies [15, 29, 30]  
12  
13  
14  
15

16 From further analyses of the veteran sample (available upon request), of the 373 CMD cases, 214  
17 (56.6%) of these were new cases since 2014-2016 (with a similar number of remitting cases). Hence  
18 whilst numbers potentially needing clinical treatment remain similar, there may be new individuals  
19 that need to engage with services. Additionally, as a majority of the COVID-19 experiences and  
20 stressors (particularly difficulties with health, work, or family/other social relationships) were  
21 associated with CMD symptoms, it may be this veteran group with CMD particularly impacted by  
22 COVID-19 pressures. Similar COVID-19 pressures on families and negative associations with mental  
23 health outcomes are reported in US samples [31]. As found in our study, the UKHLS finds negative  
24 mental health impacts for parents with childcare responsibilities and home schooling requirements  
25 during the pandemic [32]. One fifth of our sample had extra or new caring responsibilities during the  
26 pandemic which may have added to family stress levels. Previous research has shown how  
27 important social connection is for carers' mental health outcomes [33] and lockdown and social  
28 distancing needs may have disrupted support for carers in this sample.  
29  
30  
31  
32  
33

34 Compared to veterans drinking behaviours pre-pandemic in 2014-2016, levels of hazardous drinking  
35 and alcohol misuse reduced (hazardous drinking: 48.5% v 27.6% and alcohol misuse: 9.2% v 3.7%  
36 respectively). However, we found the Veterans-CHECK sample to be consuming alcohol, as  
37 measured by the AUDIT-C, at higher levels than the general population in England during the  
38 pandemic (Veterans-CHECK 49.2% v 38.3% [34]). Hence despite reductions in hazardous drinking and  
39 alcohol misuse for veterans in this sample, and increases in general population high-risk drinking, a  
40 higher proportion of veterans are still in high risk drinking categories. This finding continues to  
41 mirror previous studies that find veterans drinking at higher levels than the general population [35].  
42  
43  
44  
45

46 There may be several explanations for the reduction in hazardous drinking. Alcohol has often been  
47 using as a social bonding tool in Armed Forces community [36, 37], therefore the closing or  
48 restrictions placed on the hospitality business may explain the reduction in alcohol consumption.  
49 Alternatively, this may represent a general population trend observed in the UK population where  
50 high risk drinkers have reduced their alcohol consumption [28, 34]. The Covid-19 Social Study  
51 reports that drinking less during the pandemic was associated with being male [38], and our sample  
52 is predominantly male. The study identified that responders were less likely to have reported alcohol  
53 misuse before the pandemic, however differences in reported alcohol use between responders and  
54 non-responders were minimal. Non-responders may have mirrored general population trends of  
55 male and high risk drinkers reduction efforts [28, 34, 38] and therefore also followed this reduction  
56 trend. Few COVID-19 stressors were associated with hazardous drinking and therefore we could  
57  
58  
59  
60



1  
2  
3 surmise that alcohol was not being used as a coping mechanism in this community during the  
4 pandemic.  
5  
6

7 Our veteran sample reported lower levels of loneliness compared to a UK general population sample  
8 from the COVID-19 Social Study (26% v 39%) [39] and similar levels to another study (27%) [40]. An  
9 explanation could be that our study collected data during June to September when lockdown  
10 restrictions were less than in March to May when the other studies collected their data.  
11 Additionally, the veteran sample may have a level of protection against loneliness due to a majority  
12 being in a relationship. Of note are the findings that individuals with children under 18 years of age,  
13 and those with caring responsibilities, were more likely to report feelings of loneliness. We,  
14 therefore, see a pattern of extra pressures on those with family responsibilities, who would not have  
15 had the usual social support networks due to restrictions. The finding that key workers in health and  
16 social care were more likely to report feeling lonely compared to other key workers, highlights the  
17 extra support that healthcare key workers may need in the pandemic [41].  
18  
19  
20  
21

22 As seen elsewhere, boredom was common in veterans during the pandemic and was strongly  
23 associated with CMD, hazardous alcohol use and loneliness [42], and has been associated with  
24 psychological distress for individuals who reported 'high meaning in life', as defined as stable sense  
25 of purpose and fulfilment in life[43]. With restrictions reintroduced in the Winter of 2020 and into  
26 2021, the long-term effect of boredom on veterans' wellbeing, identity, purpose and fulfilment  
27 remains to be seen [3].  
28  
29  
30

31 Whilst CMD levels in our veteran group has not risen from pre-pandemic levels, there are still a  
32 significant minority of veterans that may need mental health treatment and support. Due to the  
33 nature of COVID-19 lockdowns and restrictions in the UK, the National Health Service and charitable  
34 providers should particularly focus on the benefits of telemedicine for veterans into the future [16,  
35 44, 45]. Our study demonstrates an impact of the pandemic on veteran families increasing their  
36 stress, relationship/caring difficulties and responsibilities. There has been success in the US  
37 promoting parenting skills for veteran families under COVID-19 pressures [46], while in the UK,  
38 resources created by King's College London and partners offer practical support for families  
39 ('Families Under Pressure') which could be utilised by veteran groups [47]. As with the general  
40 population, innovative ways are needed to tackle loneliness and improve social networks and  
41 support during the pandemic, particularly focused on those with mental health needs [48, 49].  
42  
43  
44  
45  
46

47 The study strengths include recruitment from a cohort whose previous mental health status is  
48 known, rapid roll-out, and use of validated measures for mental health and wellbeing outcomes  
49 aligned with our previous study and other UK general population studies' measures. Study  
50 limitations include recruitment from a specific veteran cohort serving during the Iraq/Afghanistan  
51 era and therefore we cannot comment on the experiences of veterans outside of this era. Only a  
52 minority of veterans in this sample were newly transitioned to civilian life and therefore this study  
53 may not capture the experiences of those who have recently left service, some of whom may be  
54 negatively impacted by this pressure point [50]. There were only a small number of younger 'other  
55 ranks' in this sample who may be more likely to experience financial issues [51] and therefore the  
56 extent of negative associations between COVID-19 stressors and outcomes may not be fully  
57 represented. The study identified that responders were less likely to have reported alcohol misuse  
58  
59  
60



1  
2  
3 before the pandemic and therefore the direction of alcohol use of non-responders is unknown which  
4 may underestimate reductions in alcohol use during the pandemic. Whilst we were able to identify  
5 similar trends in women veterans for CMD and drinking compared to male veterans in this sample,  
6 the number of women in the sample was insufficient to robustly examine associations of COVID-19  
7 stressors and outcomes. Whilst the study captures data from veterans regarding their family  
8 experiences, such as relationship, childcare and caring pressures, the study was not able to collect  
9 data from veterans' partners/spouses and children themselves. The study is limited by the majority  
10 of responses arising from veterans living in England and limited to the context of the pandemic in  
11 the UK, June-September 2020.  
12  
13  
14  
15

## 16 CONCLUSIONS

17  
18 Our study suggests a COVID-19 impact on veterans' mental health, alcohol use and loneliness,  
19 particularly for those experiencing difficulties with family or social relationships. Veterans  
20 experienced the pandemic in similar ways to the general population and in some cases may have  
21 responded in resilient ways. Whilst stable levels of CMD and reduction in alcohol use are positive,  
22 there remains a group of veterans that may need mental health and alcohol treatment services.  
23 There is a need to continue to follow up the health and wellbeing of this veteran group to assess  
24 developments longer term over the pandemic.  
25  
26  
27  
28  
29  
30  
31  
32  
33  
34  
35  
36  
37  
38  
39  
40  
41  
42  
43  
44  
45  
46  
47  
48  
49  
50  
51  
52  
53  
54  
55  
56  
57  
58  
59  
60

## Funding Statement

This work was funded by the Office of Veterans' Affairs, Cabinet Office, UK Government (Contract Ref: CCZZ20A51).

## Competing Interests

SW is Honorary Civilian Consultant Advisor in Psychiatry for the British Army (unpaid). S.W. is affiliated to the National Institute for Health Research Health Protection Research Unit (NIHR HPRU) in Emergency Preparedness and Response at King's College London in partnership with Public Health England, in collaboration with the University of East Anglia and Newcastle University.

NTF is a trustee (unpaid) of The Warrior Programme, an independent advisor to the Independent Group Advising on the Release of Data (IGARD), a member of Independent Scientific Pandemic Insights Group on Behaviours (SPI-B) and their salary is part grant funded by the MoD.

DM is a trustee of the Forces in Mind Trust (unpaid) and is employed as the Head of Research for Combat Stress, a UK Veterans Mental Health Charity.

## Acknowledgements

We acknowledge the contribution to the framing of the protocol for this research by Dr Sharon Stevelink, Dr Daniel Leightley and Rupa Bhundia through their work with the KCL-CHECK and NHS-CHECK studies. We thank the KCMHR colleagues and the veterans who helped to shape the survey questionnaire.

## Authors' Contributions

MLS, DS, MJ, HB, DP, LH, DP, DM, SW, NTF were involved in the original concept and design of the study. NTF and SW have overseen the conduct of all aspects of the study. MLS led on the formulation of the questionnaire and associated measures, with substantial contributions from all authors in shaping the final questionnaire. DP led on online survey design, format and flow. DS led on the ethics submission with substantial contributions from all authors. MJ, HB and LH led on the design of participant materials including the participant invite and information sheet with input from all authors. MJ led on the data analysis plan and conducted the data analysis with input from all authors. MLS and DS led the writing of the research paper, with drafting and revision input from all authors. MLS, DS, MJ, HB, DP, LH, DP, DM, SW, NTF have all seen and approved the final version of this paper and accept accountability for all aspects of the work. SW and NTF secured the funding from OVA for this work.

## Data Sharing Statement

Data will be processed in accordance with the General Data Protection Regulation (GDPR) and the Data Protection Act 2018. We will not make any record-level data publicly accessible because we need to protect the confidentiality and security of the individual cohort members. You are welcome to contact us with proposals for collaborative research, which the investigators will consider on a case-by-case basis, and which will only occur as part of a legal collaborative agreement and after the collaborator has put in place the relevant research ethics, data protection, and data access approvals.

## REFERENCES

1. Hale, T., et al. *Oxford COVID-19 Government Response Tracker*. 2020.
2. Douglas, M., et al., *Mitigating the wider health effects of covid-19 pandemic response*. *BMJ*, 2020. **369**: p. m1557.
3. Brooks, S.K., et al., *The psychological impact of quarantine and how to reduce it: rapid review of the evidence*. *The Lancet*, 2020.
4. Pierce, M., et al., *Mental health before and during the COVID-19 pandemic: a longitudinal probability sample survey of the UK population*. *The Lancet Psychiatry*, 2020. **7**(10): p. 883-892.
5. Banks, J. and X. Xu, *The mental health effects of the first two months of lockdown and social distancing during the Covid-19 pandemic in the UK (No. W20/16)*, I.W. Papers, Editor. 2020: Institute for Fiscal Studies (IFS), London.
6. ONS, *Coronavirus and depression in adults, Great Britain: June 2020*. 2020.
7. MOD, *Annual Population Survey: UK Armed Forces Veterans residing in Great Britain, 2017*, Ministry of Defence. 2019.
8. Asmundson, G.J.G., et al., *Do pre-existing anxiety-related and mood disorders differentially impact COVID-19 stress responses and coping?* *Journal of anxiety disorders*, 2020. **74**: p. 102271-102271.
9. Stevelink, S.A., et al., *Mental health outcomes at the end of the British involvement in the Iraq and Afghanistan conflicts: a cohort study*. *The British Journal of Psychiatry*, 2018. **213**(6): p. 690-697.
10. Murphy, D. and W. Busuttil, *Understanding the needs of veterans seeking support for mental health difficulties*. 2019, British Medical Journal Publishing Group.
11. HelpforHeroes, *Wounded veterans face health worries during the Covid-19 pandemic*. 2020, Help For Heroes.
12. Wilson, G., M. Hill, and M.D. Kiernan, *Loneliness and social isolation of military veterans: systematic narrative review*. *Occupational Medicine*, 2018. **68**(9): p. 600-609.
13. Royal British Legion, *Loneliness and social isolation in the armed forces community*. 2018.
14. Austin, G., et al., *Soldiering on only goes so far: How a qualitative study on Veteran Loneliness in New Zealand influenced support during COVID-19 lockdown*. *Journal of Military, Veteran and Family Health*, 2020. **COVID-19**: p. Author's original, CO19007.
15. Nindl, B.C., et al., *Perspectives on resilience for military readiness and preparedness: Report of an international military physiology roundtable*. *Journal of Science and Medicine in Sport*, 2018. **21**(11): p. 1116-1124.
16. Mcfarlane, A., et al., *Impact of COVID-19 on mental health care for Veterans: Improve, adapt and overcome*. *Journal of Military, Veteran and Family Health*, 2020. **COVID-19**: p. Accepted version, CO19001.
17. Rona, R.J., et al., *Mental health screening in armed forces before the Iraq war and prevention of subsequent psychological morbidity: follow-up study*. *bmj*, 2006. **333**(7576): p. 991.
18. Hotopf, M., et al., *The health of UK military personnel who deployed to the 2003 Iraq war: a cohort study*. *The lancet*, 2006. **367**(9524): p. 1731-1741.
19. Fear, N.T., et al., *What are the consequences of deployment to Iraq and Afghanistan on the mental health of the UK armed forces? A cohort study*. *The Lancet*, 2010. **375**(9728): p. 1783-1797.
20. REDCap. [cited 2020; Available from: <https://www.project-redcap.org/>].
21. Sharp, M.-L., et al., *COVID-19: Impact on the health and wellbeing of ex-serving personnel (Veterans-CHECK) protocol paper*. medRxiv, 2020.
22. Goldberg, D.P. and B. Blackwell, *Psychiatric illness in general practice: a detailed study using a new method of case identification*. *British medical journal*, 1970. **2**(5707): p. 439.
23. Babor, T.F., et al., *AUDIT: The Alcohol Use Disorders Identification Test. Guidelines for use in primary care*, Geneva. World Health Organization, 2001.

- 1
  - 2
  - 3
  - 4
  - 5
  - 6
  - 7
  - 8
  - 9
  - 10
  - 11
  - 12
  - 13
  - 14
  - 15
  - 16
  - 17
  - 18
  - 19
  - 20
  - 21
  - 22
  - 23
  - 24
  - 25
  - 26
  - 27
  - 28
  - 29
  - 30
  - 31
  - 32
  - 33
  - 34
  - 35
  - 36
  - 37
  - 38
  - 39
  - 40
  - 41
  - 42
  - 43
  - 44
  - 45
  - 46
  - 47
  - 48
  - 49
  - 50
  - 51
  - 52
  - 53
  - 54
  - 55
  - 56
  - 57
  - 58
  - 59
  - 60
24. Crawford, E.F., et al., *Diagnostic efficiency of the AUDIT-C in US veterans with military service since September 11, 2001*. Drug and Alcohol Dependence, 2013. **132**(1-2): p. 101-106.
25. Hughes, M.E., et al., *A short scale for measuring loneliness in large surveys: Results from two population-based studies*. Research on aging, 2004. **26**(6): p. 655-672.
26. StataCorp., *Stata Statistical Software: Release 16*. 2019, StataCorp LLC: College Station, TX.
27. Fancourt, D., A. Steptoe, and F. Bu, *Trajectories of depression and anxiety during enforced isolation due to COVID-19: longitudinal analyses of 36,520 adults in England*. medRxiv, 2020.
28. Niedzwiedz, C.L., et al., *Mental health and health behaviours before and during the initial phase of the COVID-19 lockdown: longitudinal analyses of the UK Household Longitudinal Study*. J Epidemiol Community Health, 2020.
29. MacManus, D., et al., *The mental health of the UK Armed Forces in the 21st century: resilience in the face of adversity*. BMJ Military Health, 2014. **160**(2): p. 125-130.
30. Mulligan, K., et al., *Psycho-educational interventions designed to prevent deployment-related psychological ill-health in Armed Forces personnel: A review*. Psychological medicine, 2011. **41**(4): p. 673.
31. Brown, S.M., et al., *Stress and parenting during the global COVID-19 pandemic*. Child abuse & neglect, 2020: p. 104699.
32. Tani, M., et al., *Working Parents, Financial Insecurity, and Child-Care: Mental Health in the Time of COVID-19*. 2020.
33. Vlachantoni, A., et al., *Social Participation and Health Outcomes Among Caregivers and Noncaregivers in Great Britain*. Journal of Applied Gerontology, 2019: p. 0733464819885528.
34. Jackson, S.E., et al., *Association of the Covid-19 lockdown with smoking, drinking, and attempts to quit in England: an analysis of 2019-2020 data*. Addiction, 2020.
35. Rhead, R., et al., *Mental Health Disorders and Alcohol Misuse Among UK Military Veterans and the General Population: A Comparison Study*. Psychological Medicine, 1-11. doi:10.1017/S0033291720001944, 2019.
36. Irizar, P., et al., *Drinking motivations in UK serving and ex-serving military personnel*. Occupational Medicine, 2020.
37. Jones, E. and N.T. Fear, *Alcohol use and misuse within the military: a review*. International review of psychiatry, 2011. **23**(2): p. 166-172.
38. Garnett, C., et al., *Factors associated with drinking behaviour during COVID-19 social distancing and lockdown among adults in the UK*. medRxiv, 2020.
39. Bu, F., A. Steptoe, and D. Fancourt, *Who is lonely in lockdown? Cross-cohort analyses of predictors of loneliness before and during the COVID-19 pandemic*. medRxiv, 2020.
40. Groarke, J.M., et al., *Loneliness in the UK during the COVID-19 pandemic: Cross-sectional results from the COVID-19 Psychological Wellbeing Study*. PloS one, 2020. **15**(9): p. e0239698.
41. Greenberg, N., et al., *Managing mental health challenges faced by healthcare workers during covid-19 pandemic*. bmj, 2020. **368**.
42. Brodeur, A., et al., *Assessing the impact of the coronavirus lockdown on unhappiness, loneliness, and boredom using Google Trends*. arXiv preprint arXiv:2004.12129, 2020.
43. Chao, M., et al., *Psychological distress and state boredom during the COVID-19 outbreak in China: the role of meaning in life and media use*. European journal of psychotraumatology, 2020. **11**(1): p. 1769379.
44. Sciarrino, N.A., U.S. Myers, and B.C. Wangelin, *When chaos is the norm: How some veterans with PTSD are continuing to engage in trauma-focused treatments during the COVID-19 pandemic*. Psychological Trauma: Theory, Research, Practice, and Policy, 2020. **12**(S1): p. S69.

- 1  
2  
3 45. Ashwick, R., D. Turgoose, and D. Murphy, *Exploring the acceptability of delivering Cognitive*  
4 *Processing Therapy (CPT) to UK veterans with PTSD over Skype: A qualitative study*. European  
5 *Journal of Psychotraumatology*, 2019. **10**(1): p. 1573128.  
6  
7 46. James Riegler, L., et al., *Pilot trial of a telepsychotherapy parenting skills intervention for*  
8 *veteran families: Implications for managing parenting stress during COVID-19*. *Journal of*  
9 *Psychotherapy Integration*, 2020. **30**(2): p. 290.  
10 47. Sonuga-Barke, E. *Families Under Pressure (POP-UP team)*. 2020 [cited 2020 November];  
11 Available from: <https://maudsleycharity.org/familiesunderpressure/>.  
12 48. Hatch, S.L., et al., *Life in and after the Armed Forces: social networks and mental health in*  
13 *the UK military*. *Sociology of health & illness*, 2013. **35**(7): p. 1045-1064.  
14 49. Murphy, D., *Exploring the impact of Covid-19 and restrictions to daily living as a result of*  
15 *social distancing within veterans with pre-existing mental health difficulties*. 2020.  
16 50. Ashcroft, M., *The veterans' transition review*. 2014.  
17 51. RBL, *A UK household survey of the ex-service community*. 2014.  
18  
19  
20  
21  
22  
23  
24  
25  
26  
27  
28  
29  
30  
31  
32  
33  
34  
35  
36  
37  
38  
39  
40  
41  
42  
43  
44  
45  
46  
47  
48  
49  
50  
51  
52  
53  
54  
55  
56  
57  
58  
59  
60

## Supplemental Information

**Table 1** - Comparison of social and military demographic characteristics of responders and non-responders. Column percentages. N = 3547

|                                  | Responder<br>N = 1562 | Non responder<br>N = 1985 | OR (95%CI)       | AOR (95% CI)*    |
|----------------------------------|-----------------------|---------------------------|------------------|------------------|
| Sex                              |                       |                           |                  |                  |
| male                             | 1,383(88.54%)         | 1,794(90.38%)             | 1.00             | 1.00             |
| female                           | 179(11.46%)           | 191(9.62%)                | 1.22 (0.98-1.51) | 1.51 (1.21-1.90) |
| Age band                         |                       |                           |                  |                  |
| 25-34                            | 46(2.94%)             | 190(9.57%)                | 0.31 (0.22-0.44) | 0.34 (0.23-0.49) |
| 35-44                            | 272(17.41%)           | 552(27.81%)               | 0.63 (0.53-0.76) | 0.63 (0.52-0.77) |
| 45-54                            | 554(35.47%)           | 710(35.77%)               | 1.00             | 1.00             |
| 55-64                            | 514(32.91%)           | 444(22.37%)               | 1.48 (1.25-1.76) | 1.51 (1.27-1.79) |
| 65 and over                      | 176(11.27%)           | 89(4.48%)                 | 2.53 (1.92-3.35) | 2.56 (1.91-3.43) |
| Rank                             |                       |                           |                  |                  |
| Officer                          | 478(30.60%)           | 462(23.27%)               | 1.31 (1.12-1.53) | 1.02 (0.85-1.22) |
| NCO                              | 954(61.08%)           | 1,209(60.91%)             | 1.00             | 1.00             |
| Other rank                       | 130(8.32%)            | 314(15.82)                | 0.52 (0.42-0.66) | 0.92 (0.71-1.19) |
| Service                          |                       |                           |                  |                  |
| Royal Navy                       | 290(18.57%)           | 393(19.80%)               | 1.02 (0.85-1.21) | 0.88 (0.74-1.06) |
| Army                             | 873(55.89%)           | 1,201(60.50%)             | 1.00             | 1.00             |
| RAF                              | 399(25.54%)           | 391(19.70%)               | 1.40 (1.19-1.65) | 1.18 (0.99-1.40) |
| Education level                  |                       |                           |                  |                  |
| No qualifications/O-levels/GCSEs | 385(24.65%)           | 577(29.10%)               | 0.72 (0.61-0.85) | 0.83 (0.69-1.00) |
| A-level                          | 506(32.39%)           | 682(34.39%)               | 0.80 (0.69-0.94) | 0.93 (0.78-1.10) |
| Degree                           | 671(42.96%)           | 724(36.51%)               | 1.00             | 1.00             |
| Relationship status              |                       |                           |                  |                  |
| In a relationship                | 1,337(86.82%)         | 1,679(86.24%)             | 1.00             | 1.00             |
| Single                           | 90(5.84%)             | 145(7.45%)                | 0.78 (0.59-1.02) | 1.03 (0.77-1.37) |
| Ex-relationship                  | 113(7.34%)            | 123(6.32%)                | 1.15 (0.88-1.50) | 1.06 (0.80-1.39) |

\*adjusted for sex, age, education, service and rank



**Table 2 – Association between CMD, Hazardous alcohol consumption and Loneliness and COVID19 experiences and stressors**

|                                            | N (%)         | Common Mental Disorders (AOR 95% CI) *<br>N = 376<br>(25.97%) | Common Mental Disorders (AOR 95% CI) **<br>N = 376<br>(25.97%) | Hazardous drinking (AUDIT ≥8) (AOR 95% CI) *<br>N = 367<br>(27.82%) | Hazardous drinking (AUDIT ≥8) (AOR 95% CI) **<br>N = 367<br>(27.82%) |
|--------------------------------------------|---------------|---------------------------------------------------------------|----------------------------------------------------------------|---------------------------------------------------------------------|----------------------------------------------------------------------|
| <b>Had or have COVID-19</b>                |               |                                                               |                                                                |                                                                     |                                                                      |
| No                                         | 866 (53.80%)  | 1.00                                                          | 1.00                                                           | 1.00                                                                | 1.00                                                                 |
| Yes (definitely/probably)                  | 226 (14.83%)  | 1.55 (1.08-2.22)                                              | 1.49 (1.02-2.16)                                               | 0.80 (0.55-1.16)                                                    | 0.68 (0.45-1.05)                                                     |
| Don't know                                 | 470 (31.37%)  | 1.06 (0.79-1.43)                                              | 1.03 (0.76-1.40)                                               | 0.78 (0.58-1.05)                                                    | 0.70 (0.50-0.98)                                                     |
| <b>Had to isolate</b>                      |               |                                                               |                                                                |                                                                     |                                                                      |
| No                                         | 1310 (83.51%) | 1.00                                                          | 1.00                                                           | 1.00                                                                |                                                                      |
| Yes                                        | 249 (16.49%)  | 1.33 (0.96-1.85)                                              | 1.24 (0.88-1.74)                                               | 0.89 (0.63-1.26)                                                    | 0.69 (0.47-1.02)                                                     |
| <b>Know someone who died from COVID-19</b> |               |                                                               |                                                                |                                                                     |                                                                      |
| No                                         | 1276 (81.52%) | 1.00                                                          |                                                                | 1.00                                                                |                                                                      |
| Yes                                        | 286 (18.48%)  | 1.76 (1.29-2.40)                                              | 1.73 (1.26-2.38))                                              | 0.95 (0.68-1.33)                                                    | 0.97 (0.66-1.43)                                                     |
| <b>Change in employment</b>                |               |                                                               |                                                                |                                                                     |                                                                      |
| no change or furlough                      | 1425 (91.60%) | 1.00                                                          |                                                                | 1.00                                                                |                                                                      |
| change for worse                           | 134 (8.40%)   | 3.14 (2.15-4.60)                                              | 3.07 (2.03-4.65)                                               | 1.26 (0.82-1.93)                                                    | 1.04 (0.64-1.71)                                                     |
| <b>Key Worker</b>                          |               |                                                               |                                                                |                                                                     |                                                                      |
| Not a key worker                           | 880 (53.72%)  | 1.42 (1.06-1.89)                                              | 1.43 (1.06-1.93)                                               | 1.09 (0.81-1.45)                                                    | 0.87 (0.63-1.22)                                                     |
| Key worker – Health and social care        | 131 (8.79%)   | 1.40 (0.85-2.31)                                              | 1.33 (0.77-2.30)                                               | 0.81 (0.47-1.38)                                                    | 0.70 (0.40-1.21)                                                     |
| Key workers - All other roles              | 543 (37.48%)  | 1.00                                                          |                                                                | 1.00                                                                | 1.00                                                                 |
| <b>Who usually live with</b>               |               |                                                               |                                                                |                                                                     |                                                                      |
| Live alone                                 | 170 (11.04%)  | 2.11 (1.07-4.16)                                              | 1.82 (0.91-3.66)                                               | 1.56 (0.82-2.96)                                                    | 1.81 (0.88-3.71)                                                     |
| Live with spouse/partner                   | 1328 (84.55%) | 1.00                                                          | 1.00                                                           | 1.00                                                                | 1.00                                                                 |
| Live with others                           | 59 (4.41%)    | 1.59 (0.55-4.60)                                              | 1.40 (0.51-3.86)                                               | 0.95 (0.35-2.59)                                                    | 1.11 (0.36-3.45)                                                     |
| <b>Children</b>                            |               |                                                               |                                                                |                                                                     |                                                                      |
| Have no children                           | 357 (24.50%)  | 1.00                                                          | 1.00                                                           | 1.00                                                                | 1.00                                                                 |
| Have children but not responsible for      | 666 (36.04%)  | 1.14 (0.78-1.67)                                              | 1.09 (0.74-1.59)                                               | 0.93 (0.64-1.36)                                                    | 1.05 (0.68-1.62)                                                     |



|                                                             | N (%)         | Common Mental Disorders (AOR 95% CI) *<br>N = 376<br>(25.97%) | Common Mental Disorders (AOR 95% CI) **<br>N = 376<br>(25.97%) | Hazardous drinking (AUDIT ≥8) (AOR 95% CI) *<br>N = 367<br>(27.82%) | Hazardous drinking (AUDIT ≥8) (AOR 95% CI) **<br>N = 367<br>(27.82%) |
|-------------------------------------------------------------|---------------|---------------------------------------------------------------|----------------------------------------------------------------|---------------------------------------------------------------------|----------------------------------------------------------------------|
| Responsible for one child under 18 years old                | 214 (15.23%)  | 0.87 (0.53-1.41)                                              | 0.88 (0.54-1.46)                                               | 0.92 (0.59-1.44)                                                    | 1.08 (0.64-1.82)                                                     |
| Responsible for two or more children under 18 years of age  | 320 (24.23%)  | 1.56 (1.03-2.37)                                              | 1.62 (1.07-2.47)                                               | 0.87 (0.57-1.33)                                                    | 1.18 (0.72-1.94)                                                     |
| <b>Changed childcare arrangements</b>                       |               |                                                               |                                                                |                                                                     |                                                                      |
| No                                                          | 243 (52.40%)  | 1.00                                                          | 1.00                                                           | 1.00                                                                |                                                                      |
| Yes                                                         | 214 (47.60%)  | 2.31 (1.47-3.64)                                              | 2.24 (1.41-3.54)                                               | 1.15 (0.73-1.84)                                                    | 1.11 (0.65-1.90)                                                     |
| <b>Impact of changed childcare arrangements</b>             |               |                                                               |                                                                |                                                                     |                                                                      |
| Positive impact                                             | 33 (14.08%)   | 0.60 (0.21-1.67)                                              | 0.72 (0.26-1.98)                                               | 1.16 (0.45-3.00)                                                    | 0.99 (0.30-3.26)                                                     |
| Negative impact                                             | 94 (44.73%)   | 1.96 (0.99-3.89)                                              | 1.91 (0.94-3.88)                                               | 1.39 (0.68-2.85)                                                    | 1.27 (0.56-2.87)                                                     |
| Neutral impact                                              | 87 (41.19%)   | 1.00                                                          | 1.00                                                           | 1.00                                                                | 1.00                                                                 |
| <b>Usual caring responsibilities (pre pandemic)</b>         |               |                                                               |                                                                |                                                                     |                                                                      |
| No                                                          | 1361 (87.55%) | 1.00                                                          | 1.00                                                           | 1.00                                                                |                                                                      |
| yes                                                         | 195 (12.45%)  | 1.74 (1.20-2.53)                                              | 1.73 (1.19-2.51)                                               | 0.79 (0.52-1.21)                                                    | 0.90 (0.55-1.48)                                                     |
| <b>Extra or new caring responsibilities during pandemic</b> |               |                                                               |                                                                |                                                                     |                                                                      |
| No                                                          | 1285 (82.10%) | 1.00                                                          |                                                                | 1.00                                                                |                                                                      |
| yes                                                         | 271 (17.90%)  | 1.77 (1.29-2.43)                                              | 1.77 (1.27-2.48)                                               | 1.01 (0.71-1.42)                                                    | 1.07 (0.71-1.60)                                                     |
| <b>Financial problems</b>                                   |               |                                                               |                                                                |                                                                     |                                                                      |
| No                                                          | 1379 (86.96%) | 1.00                                                          | 1.00                                                           | 1.00                                                                |                                                                      |
| yes                                                         | 183 (13.04%)  | 2.93 (2.06-4.15)                                              | 2.67 (1.89-3.78)                                               | 1.04 (0.69-1.57)                                                    | 0.96 (0.59-1.58)                                                     |
| <b>Had difficulty accessing enough food</b>                 |               |                                                               |                                                                |                                                                     |                                                                      |
| No                                                          | 1533 (97.9%)  | 1.00                                                          | 1.00                                                           | 1.00                                                                | 1.00                                                                 |
| Yes                                                         | 29 (2.09%)    | 3.10 (1.35-7.16)                                              | 2.27 (0.91-5.67)                                               | 1.64 (0.70-3.82)                                                    | 1.28 (0.51-3.21)                                                     |
| <b>Had difficulty accessing medication</b>                  |               |                                                               |                                                                |                                                                     |                                                                      |

|                                                            | N (%)         | Common Mental Disorders (AOR 95% CI) *<br>N = 376 (25.97%) | Common Mental Disorders (AOR 95% CI) **<br>N = 376 (25.97%) | Hazardous drinking (AUDIT ≥8) (AOR 95% CI) *<br>N = 367 (27.82%) | Hazardous drinking (AUDIT ≥8) (AOR 95% CI) **<br>N = 367 (27.82%) |
|------------------------------------------------------------|---------------|------------------------------------------------------------|-------------------------------------------------------------|------------------------------------------------------------------|-------------------------------------------------------------------|
| No                                                         | 1490 (94.86%) | 1.00                                                       | 1.00                                                        | 1.00                                                             | 1.00                                                              |
| Yes                                                        | 72 (5.14%)    | 2.32 (1.34-4.02)                                           | 1.57 (0.89-2.76-)                                           | 1.01 (0.52-1.95)                                                 | 0.82 (0.36-1.86)                                                  |
| <b>Had difficulty with health</b>                          |               |                                                            |                                                             |                                                                  |                                                                   |
| No                                                         | 1374 (87.49%) | 1.00                                                       | 1.00                                                        | 1.00                                                             | 1.00                                                              |
| Yes                                                        | 188 (12.51%)  | 6.94 (4.91-9.83)                                           | 5.47 (3.83-7.81)                                            | 1.73 (1.19-2.51)                                                 | 1.67 (1.07-2.61)                                                  |
| <b>Had somebody close in hospital</b>                      |               |                                                            |                                                             |                                                                  |                                                                   |
| No                                                         | 1460 (93.24%) | 1.00                                                       | 1.00                                                        | 1.00                                                             | 1.00                                                              |
| Yes                                                        | 102 (6.76%)   | 2.40 (1.51-3.81)                                           | 2.50 (1.54-4.05)                                            | 1.25 (0.76-2.07)                                                 | 1.10 (0.60-2.01)                                                  |
| <b>Lost somebody close</b>                                 |               |                                                            |                                                             |                                                                  |                                                                   |
| No                                                         | 1489 (94.90%) | 1.00                                                       | 1.00                                                        | 1.00                                                             | 1.00                                                              |
| Yes                                                        | 73 (5.10%)    | 1.85 (1.06-3.22)                                           | 1.55 (0.86-2.79)                                            | 0.63 (0.32-1.26)                                                 | 0.51 (0.22-1.17)                                                  |
| <b>Had to change delay or major plan</b>                   |               |                                                            |                                                             |                                                                  |                                                                   |
| No                                                         | 1198 (76.26%) | 1.00                                                       | 1.00                                                        | 1.00                                                             | 1.00                                                              |
| Yes                                                        | 364 (23.74%)  | 2.50 (1.89-3.32)                                           | 2.27 (1.69-3.06)                                            | 1.16 (0.85-1.57)                                                 | 0.97 (0.68-1.38)                                                  |
| <b>Difficulties with family/other social relationships</b> |               |                                                            |                                                             |                                                                  |                                                                   |
| No                                                         | 1284 (80.53%) | 1.00                                                       | 1.00                                                        | 1.00                                                             | 1.00                                                              |
| Yes                                                        | 278 (19.47%)  | 5.29 (3.85-7.27)                                           | 4.64 (3.33-6.46)                                            | 1.70 (1.22-2.36)                                                 | 1.56 (1.05-2.30)                                                  |
| <b>Difficulties with internet access</b>                   |               |                                                            |                                                             |                                                                  |                                                                   |
| No                                                         | 1455 (92.95%) | 1.00                                                       | 1.00                                                        | 1.00                                                             | 1.00                                                              |
| Yes                                                        | 107 (7.05%)   | 1.84 (1.17-2.88)                                           | 1.88 (1.18-3.00)                                            | 1.06 (0.65-1.72)                                                 | 1.31 (0.75-2.26)                                                  |
| <b>Work difficulties</b>                                   |               |                                                            |                                                             |                                                                  |                                                                   |
| No                                                         | 1293 (81.03%) | 1.00                                                       | 1.00                                                        | 1.00                                                             | 1.00                                                              |

|                               | N (%)         | Common Mental Disorders (AOR 95% CI) *<br>N = 376 (25.97%) | Common Mental Disorders (AOR 95% CI) **<br>N = 376 (25.97%) | Hazardous drinking (AUDIT ≥8) (AOR 95% CI) *<br>N = 367 (27.82%) | Hazardous drinking (AUDIT ≥8) (AOR 95% CI) **<br>N = 367 (27.82%) |
|-------------------------------|---------------|------------------------------------------------------------|-------------------------------------------------------------|------------------------------------------------------------------|-------------------------------------------------------------------|
| Yes                           | 269 (18.97%)  | 4.12 (3.01-5.65)                                           | 3.68 (2.64-5.14)                                            | 1.39 (1.00-1.94)                                                 | 1.40 (0.94-2.09)                                                  |
| <b>Difficulties with pets</b> |               |                                                            |                                                             |                                                                  |                                                                   |
| No                            | 1522 (97.46%) | 1.00                                                       | 1.00                                                        | 1.00                                                             | 1.00                                                              |
| Yes                           | 40 (2.54%)    | 2.79 (1.44-5.41)                                           | 2.52 (1.25-5.06)                                            | 0.90 (0.40-2.05)                                                 | 0.88 (0.36-2.17)                                                  |
| <b>Boredom</b>                |               |                                                            |                                                             |                                                                  |                                                                   |
| No                            | 1210 (75.06%) | 1.00                                                       | 1.00                                                        | 1.00                                                             | 1.00                                                              |
| Yes                           | 352 (24.94%)  | 2.88 (2.15-3.85)                                           | 2.69 (1.98-3.65-)                                           | 1.75 (1.28-2.39)                                                 | 1.55 (1.09-2.20)                                                  |

\* Adjusted for sex, age, education, marital status, rank, service

\*\* Adjusted for sex, age, education, marital status, rank, service and phase 3 GHQ or AUDIT-8 as appropriate

STROBE Statement—Checklist of items that should be included in reports of *cohort studies*

|                              | Item No | Recommendation                                                                                                                                                                                                                                                                                                         | Page No |
|------------------------------|---------|------------------------------------------------------------------------------------------------------------------------------------------------------------------------------------------------------------------------------------------------------------------------------------------------------------------------|---------|
| <b>Title and abstract</b>    | 1       | (a) Indicate the study's design with a commonly used term in the title or the abstract<br>(b) Provide in the abstract an informative and balanced summary of what was done and what was found                                                                                                                          | 1-2     |
| <b>Introduction</b>          |         |                                                                                                                                                                                                                                                                                                                        |         |
| Background/rationale         | 2       | Explain the scientific background and rationale for the investigation being reported                                                                                                                                                                                                                                   | 3       |
| Objectives                   | 3       | State specific objectives, including any prespecified hypotheses                                                                                                                                                                                                                                                       | 3       |
| <b>Methods</b>               |         |                                                                                                                                                                                                                                                                                                                        |         |
| Study design                 | 4       | Present key elements of study design early in the paper                                                                                                                                                                                                                                                                | 4       |
| Setting                      | 5       | Describe the setting, locations, and relevant dates, including periods of recruitment, exposure, follow-up, and data collection                                                                                                                                                                                        | 4-5     |
| Participants                 | 6       | (a) Give the eligibility criteria, and the sources and methods of selection of participants. Describe methods of follow-up<br>(b) For matched studies, give matching criteria and number of exposed and unexposed                                                                                                      | 4-5     |
| Variables                    | 7       | Clearly define all outcomes, exposures, predictors, potential confounders, and effect modifiers. Give diagnostic criteria, if applicable                                                                                                                                                                               | 4-5     |
| Data sources/<br>measurement | 8*      | For each variable of interest, give sources of data and details of methods of assessment (measurement). Describe comparability of assessment methods if there is more than one group                                                                                                                                   | 4-5     |
| Bias                         | 9       | Describe any efforts to address potential sources of bias                                                                                                                                                                                                                                                              | 5       |
| Study size                   | 10      | Explain how the study size was arrived at                                                                                                                                                                                                                                                                              | 4       |
| Quantitative variables       | 11      | Explain how quantitative variables were handled in the analyses. If applicable, describe which groupings were chosen and why                                                                                                                                                                                           | 5       |
| Statistical methods          | 12      | (a) Describe all statistical methods, including those used to control for confounding<br>(b) Describe any methods used to examine subgroups and interactions<br>(c) Explain how missing data were addressed<br>(d) If applicable, explain how loss to follow-up was addressed<br>(e) Describe any sensitivity analyses | 5       |
| <b>Results</b>               |         |                                                                                                                                                                                                                                                                                                                        |         |
| Participants                 | 13*     | (a) Report numbers of individuals at each stage of study—eg numbers potentially eligible, examined for eligibility, confirmed eligible, included in the study, completing follow-up, and analysed<br>(b) Give reasons for non-participation at each stage<br>(c) Consider use of a flow diagram                        | 5       |
| Descriptive data             | 14*     | (a) Give characteristics of study participants (eg demographic, clinical, social) and information on exposures and potential confounders<br>(b) Indicate number of participants with missing data for each variable of interest<br>(c) Summarise follow-up time (eg, average and total amount)                         | 5-6     |
| Outcome data                 | 15*     | Report numbers of outcome events or summary measures over time                                                                                                                                                                                                                                                         | 6-7     |

|    |                          |                                                                                                                  |                                                                                                                                                                                                              |       |
|----|--------------------------|------------------------------------------------------------------------------------------------------------------|--------------------------------------------------------------------------------------------------------------------------------------------------------------------------------------------------------------|-------|
| 1  | Main results             | 16                                                                                                               | (a) Give unadjusted estimates and, if applicable, confounder-adjusted estimates and their precision (eg, 95% confidence interval). Make clear which confounders were adjusted for and why they were included | 6-10  |
| 2  |                          | (b) Report category boundaries when continuous variables were categorized                                        |                                                                                                                                                                                                              |       |
| 3  |                          | (c) If relevant, consider translating estimates of relative risk into absolute risk for a meaningful time period |                                                                                                                                                                                                              |       |
| 4  | Other analyses           | 17                                                                                                               | Report other analyses done—eg analyses of subgroups and interactions, and sensitivity analyses                                                                                                               | 10    |
| 5  | <b>Discussion</b>        |                                                                                                                  |                                                                                                                                                                                                              |       |
| 6  | Key results              | 18                                                                                                               | Summarise key results with reference to study objectives                                                                                                                                                     | 11    |
| 7  | Limitations              | 19                                                                                                               | Discuss limitations of the study, taking into account sources of potential bias or imprecision. Discuss both direction and magnitude of any potential bias                                                   | 13    |
| 8  | Interpretation           | 20                                                                                                               | Give a cautious overall interpretation of results considering objectives, limitations, multiplicity of analyses, results from similar studies, and other relevant evidence                                   | 11-12 |
| 9  | Generalisability         | 21                                                                                                               | Discuss the generalisability (external validity) of the study results                                                                                                                                        | 13    |
| 10 | <b>Other information</b> |                                                                                                                  |                                                                                                                                                                                                              |       |
| 11 | Funding                  | 22                                                                                                               | Give the source of funding and the role of the funders for the present study and, if applicable, for the original study on which the present article is based                                                | 14    |

\*Give information separately for exposed and unexposed groups.

**Note:** An Explanation and Elaboration article discusses each checklist item and gives methodological background and published examples of transparent reporting. The STROBE checklist is best used in conjunction with this article (freely available on the Web sites of PLoS Medicine at <http://www.plosmedicine.org/>, Annals of Internal Medicine at <http://www.annals.org/>, and Epidemiology at <http://www.epidem.com/>). Information on the STROBE Initiative is available at <http://www.strobe-statement.org>.
