# Supplementary material for: UK veterans’ mental health and well-being before and during the COVID-19 pandemic: a longitudinal cohort study
Source: PubMed Central journal article supplement — BMJ Open. 2021 Aug 27;11(8):e049815. doi: 10.1136/bmjopen-2021-049815 (PMC8406464; doi:10.1136/bmjopen-2021-049815), 2021-08-27
Supplement: bmjopen-2021-049815supp001.pdf [file bmjopen-2021-049815supp001.pdf]

## Supplemental Information

**Table 1** - Comparison of social and military demographic characteristics of responders and non-responders. Column percentages. N = 3547

|                                  | Responder<br>N = 1562 | Non responder<br>N = 1985 | OR (95%CI)       | AOR (95% CI)*    |
|----------------------------------|-----------------------|---------------------------|------------------|------------------|
| Sex                              |                       |                           |                  |                  |
| male                             | 1,383(88.54%)         | 1,794(90.38%)             | 1.00             | 1.00             |
| female                           | 179(11.46%)           | 191(9.62%)                | 1.22 (0.98-1.51) | 1.51 (1.21-1.90) |
| Age band                         |                       |                           |                  |                  |
| 25-34                            | 46(2.94%)             | 190(9.57%)                | 0.31 (0.22-0.44) | 0.34 (0.23-0.49) |
| 35-44                            | 272(17.41%)           | 552(27.81%)               | 0.63 (0.53-0.76) | 0.63 (0.52-0.77) |
| 45-54                            | 554(35.47%)           | 710(35.77%)               | 1.00             | 1.00             |
| 55-64                            | 514(32.91%)           | 444(22.37%)               | 1.48 (1.25-1.76) | 1.51 (1.27-1.79) |
| 65 and over                      | 176(11.27%)           | 89(4.48%)                 | 2.53 (1.92-3.35) | 2.56 (1.91-3.43) |
| Rank                             |                       |                           |                  |                  |
| Officer                          | 478(30.60%)           | 462(23.27%)               | 1.31 (1.12-1.53) | 1.02 (0.85-1.22) |
| NCO                              | 954(61.08%)           | 1,209(60.91%)             | 1.00             | 1.00             |
| Other rank                       | 130(8.32%)            | 314(15.82)                | 0.52 (0.42-0.66) | 0.92 (0.71-1.19) |
| Service                          |                       |                           |                  |                  |
| Royal Navy                       | 290(18.57%)           | 393(19.80%)               | 1.02 (0.85-1.21) | 0.88 (0.74-1.06) |
| Army                             | 873(55.89%)           | 1,201(60.50%)             | 1.00             | 1.00             |
| RAF                              | 399(25.54%)           | 391(19.70%)               | 1.40 (1.19-1.65) | 1.18 (0.99-1.40) |
| Education level                  |                       |                           |                  |                  |
| No qualifications/O-levels/GCSEs | 385(24.65%)           | 577(29.10%)               | 0.72 (0.61-0.85) | 0.83 (0.69-1.00) |
| A-level                          | 506(32.39%)           | 682(34.39%)               | 0.80 (0.69-0.94) | 0.93 (0.78-1.10) |
| Degree                           | 671(42.96%)           | 724(36.51%)               | 1.00             | 1.00             |
| Relationship status              |                       |                           |                  |                  |
| In a relationship                | 1,337(86.82%)         | 1,679(86.24%)             | 1.00             | 1.00             |
| Single                           | 90(5.84%)             | 145(7.45%)                | 0.78 (0.59-1.02) | 1.03 (0.77-1.37) |
| Ex-relationship                  | 113(7.34%)            | 123(6.32%)                | 1.15 (0.88-1.50) | 1.06 (0.80-1.39) |

\*adjusted for sex, age, education, service and rank

**Table 2 – Association between CMD, Hazardous alcohol consumption and Loneliness and COVID19 experiences and stressors**

|                                            | N (%)         | Common Mental Disorders (AOR 95% CI) *<br>N = 376<br>(25.97%) | Common Mental Disorders (AOR 95% CI) **<br>N = 376<br>(25.97%) | Hazardous drinking (AUDIT ≥8) (AOR 95% CI) *<br>N = 367<br>(27.82%) | Hazardous drinking (AUDIT ≥8) (AOR 95% CI) **<br>N = 367<br>(27.82%) |
|--------------------------------------------|---------------|---------------------------------------------------------------|----------------------------------------------------------------|---------------------------------------------------------------------|----------------------------------------------------------------------|
| <b>Had or have COVID-19</b>                |               |                                                               |                                                                |                                                                     |                                                                      |
| No                                         | 866 (53.80%)  | 1.00                                                          | 1.00                                                           | 1.00                                                                | 1.00                                                                 |
| Yes (definitely/probably)                  | 226 (14.83%)  | 1.55 (1.08-2.22)                                              | 1.49 (1.02-2.16)                                               | 0.80 (0.55-1.16)                                                    | 0.68 (0.45-1.05)                                                     |
| Don't know                                 | 470 (31.37%)  | 1.06 (0.79-1.43)                                              | 1.03 (0.76-1.40)                                               | 0.78 (0.58-1.05)                                                    | 0.70 (0.50-0.98)                                                     |
| <b>Had to isolate</b>                      |               |                                                               |                                                                |                                                                     |                                                                      |
| No                                         | 1310 (83.51%) | 1.00                                                          | 1.00                                                           | 1.00                                                                |                                                                      |
| Yes                                        | 249 (16.49%)  | 1.33 (0.96-1.85)                                              | 1.24 (0.88-1.74)                                               | 0.89 (0.63-1.26)                                                    | 0.69 (0.47-1.02)                                                     |
| <b>Know someone who died from COVID-19</b> |               |                                                               |                                                                |                                                                     |                                                                      |
| No                                         | 1276 (81.52%) | 1.00                                                          |                                                                | 1.00                                                                |                                                                      |
| Yes                                        | 286 (18.48%)  | 1.76 (1.29-2.40)                                              | 1.73 (1.26-2.38)                                               | 0.95 (0.68-1.33)                                                    | 0.97 (0.66-1.43)                                                     |
| <b>Change in employment</b>                |               |                                                               |                                                                |                                                                     |                                                                      |
| no change or furlough                      | 1425 (91.60%) | 1.00                                                          |                                                                | 1.00                                                                |                                                                      |
| change for worse                           | 134 (8.40%)   | 3.14 (2.15-4.60)                                              | 3.07 (2.03-4.65)                                               | 1.26 (0.82-1.93)                                                    | 1.04 (0.64-1.71)                                                     |
| <b>Key Worker</b>                          |               |                                                               |                                                                |                                                                     |                                                                      |
| Not a key worker                           | 880 (53.72%)  | 1.42 (1.06-1.89)                                              | 1.43 (1.06-1.93)                                               | 1.09 (0.81-1.45)                                                    | 0.87 (0.63-1.22)                                                     |
| Key worker – Health and social care        | 131 (8.79%)   | 1.40 (0.85-2.31)                                              | 1.33 (0.77-2.30)                                               | 0.81 (0.47-1.38)                                                    | 0.70 (0.40-1.21)                                                     |
| Key workers - All other roles              | 543 (37.48%)  | 1.00                                                          |                                                                | 1.00                                                                | 1.00                                                                 |
| <b>Who usually live with</b>               |               |                                                               |                                                                |                                                                     |                                                                      |
| Live alone                                 | 170 (11.04%)  | 2.11 (1.07-4.16)                                              | 1.82 (0.91-3.66)                                               | 1.56 (0.82-2.96)                                                    | 1.81 (0.88-3.71)                                                     |
| Live with spouse/partner                   | 1328 (84.55%) | 1.00                                                          | 1.00                                                           | 1.00                                                                | 1.00                                                                 |
| Live with others                           | 59 (4.41%)    | 1.59 (0.55-4.60)                                              | 1.40 (0.51-3.86)                                               | 0.95 (0.35-2.59)                                                    | 1.11 (0.36-3.45)                                                     |
| <b>Children</b>                            |               |                                                               |                                                                |                                                                     |                                                                      |
| Have no children                           | 357 (24.50%)  | 1.00                                                          | 1.00                                                           | 1.00                                                                | 1.00                                                                 |
| Have children but not responsible for      | 666 (36.04%)  | 1.14 (0.78-1.67)                                              | 1.09 (0.74-1.59)                                               | 0.93 (0.64-1.36)                                                    | 1.05 (0.68-1.62)                                                     |

|                                                             | N (%)         | Common Mental Disorders (AOR 95% CI) *<br>N = 376<br>(25.97%) | Common Mental Disorders (AOR 95% CI) **<br>N = 376<br>(25.97%) | Hazardous drinking (AUDIT ≥8) (AOR 95% CI) *<br>N = 367<br>(27.82%) | Hazardous drinking (AUDIT ≥8) (AOR 95% CI)**<br>N = 367<br>(27.82%) |
|-------------------------------------------------------------|---------------|---------------------------------------------------------------|----------------------------------------------------------------|---------------------------------------------------------------------|---------------------------------------------------------------------|
| Responsible for one child under 18 years old                | 214 (15.23%)  | 0.87 (0.53-1.41)                                              | 0.88 (0.54-1.46)                                               | 0.92 (0.59-1.44)                                                    | 1.08 (0.64-1.82)                                                    |
| Responsible for two or more children under 18 years of age  | 320 (24.23%)  | 1.56 (1.03-2.37)                                              | 1.62 (1.07-2.47)                                               | 0.87 (0.57-1.33)                                                    | 1.18 (0.72-1.94)                                                    |
| <b>Changed childcare arrangements</b>                       |               |                                                               |                                                                |                                                                     |                                                                     |
| No                                                          | 243 (52.40%)  | 1.00                                                          | 1.00                                                           | 1.00                                                                |                                                                     |
| Yes                                                         | 214 (47.60%)  | 2.31 (1.47-3.64)                                              | 2.24 (1.41-3.54)                                               | 1.15 (0.73-1.84)                                                    | 1.11 (0.65-1.90)                                                    |
| <b>Impact of changed childcare arrangements</b>             |               |                                                               |                                                                |                                                                     |                                                                     |
| Positive impact                                             | 33 (14.08%)   | 0.60 (0.21-1.67)                                              | 0.72 (0.26-1.98)                                               | 1.16 (0.45-3.00)                                                    | 0.99 (0.30-3.26)                                                    |
| Negative impact                                             | 94 (44.73%)   | 1.96 (0.99-3.89)                                              | 1.91 (0.94-3.88)                                               | 1.39 (0.68-2.85)                                                    | 1.27 (0.56-2.87)                                                    |
| Neutral impact                                              | 87 (41.19%)   | 1.00                                                          | 1.00                                                           | 1.00                                                                | 1.00                                                                |
| <b>Usual caring responsibilities (pre pandemic)</b>         |               |                                                               |                                                                |                                                                     |                                                                     |
| No                                                          | 1361 (87.55%) | 1.00                                                          | 1.00                                                           | 1.00                                                                |                                                                     |
| yes                                                         | 195 (12.45%)  | 1.74 (1.20-2.53)                                              | 1.73 (1.19-2.51)                                               | 0.79 (0.52-1.21)                                                    | 0.90 (0.55-1.48)                                                    |
| <b>Extra or new caring responsibilities during pandemic</b> |               |                                                               |                                                                |                                                                     |                                                                     |
| No                                                          | 1285 (82.10%) | 1.00                                                          |                                                                | 1.00                                                                |                                                                     |
| yes                                                         | 271 (17.90%)  | 1.77 (1.29-2.43)                                              | 1.77 (1.27-2.48)                                               | 1.01 (0.71-1.42)                                                    | 1.07 (0.71-1.60)                                                    |
| <b>Financial problems</b>                                   |               |                                                               |                                                                |                                                                     |                                                                     |
| No                                                          | 1379 (86.96%) | 1.00                                                          | 1.00                                                           | 1.00                                                                |                                                                     |
| yes                                                         | 183 (13.04%)  | 2.93 (2.06-4.15)                                              | 2.67 (1.89-3.78)                                               | 1.04 (0.69-1.57)                                                    | 0.96 (0.59-1.58)                                                    |
| <b>Had difficulty accessing enough food</b>                 |               |                                                               |                                                                |                                                                     |                                                                     |
| No                                                          | 1533 (97.9%)  | 1.00                                                          | 1.00                                                           | 1.00                                                                | 1.00                                                                |
| Yes                                                         | 29 (2.09%)    | 3.10 (1.35-7.16)                                              | 2.27 (0.91-5.67)                                               | 1.64 (0.70-3.82)                                                    | 1.28 (0.51-3.21)                                                    |
| <b>Had difficulty accessing medication</b>                  |               |                                                               |                                                                |                                                                     |                                                                     |

|                                                            | N (%)            | Common Mental Disorders (AOR 95% CI) *<br>N = 376<br>(25.97%) | Common Mental Disorders (AOR 95% CI) **<br>N = 376<br>(25.97%) | Hazardous drinking (AUDIT ≥8) (AOR 95% CI) *<br>N = 367<br>(27.82%) | Hazardous drinking (AUDIT ≥8) (AOR 95% CI) **<br>N = 367<br>(27.82%) |
|------------------------------------------------------------|------------------|---------------------------------------------------------------|----------------------------------------------------------------|---------------------------------------------------------------------|----------------------------------------------------------------------|
| No                                                         | 1490<br>(94.86%) | 1.00                                                          | 1.00                                                           | 1.00                                                                | 1.00                                                                 |
| Yes                                                        | 72 (5.14%)       | 2.32 (1.34-4.02)                                              | 1.57 (0.89-2.76-)                                              | 1.01 (0.52-1.95)                                                    | 0.82 (0.36-1.86)                                                     |
| <b>Had difficulty with health</b>                          |                  |                                                               |                                                                |                                                                     |                                                                      |
| No                                                         | 1374<br>(87.49%) | 1.00                                                          | 1.00                                                           | 1.00                                                                | 1.00                                                                 |
| Yes                                                        | 188 (12.51%)     | 6.94 (4.91-9.83)                                              | 5.47 (3.83-7.81)                                               | 1.73 (1.19-2.51)                                                    | 1.67 (1.07-2.61)                                                     |
| <b>Had somebody close in hospital</b>                      |                  |                                                               |                                                                |                                                                     |                                                                      |
| No                                                         | 1460<br>(93.24%) | 1.00                                                          | 1.00                                                           | 1.00                                                                | 1.00                                                                 |
| Yes                                                        | 102 (6.76%)      | 2.40 (1.51-3.81)                                              | 2.50 (1.54-4.05)                                               | 1.25 (0.76-2.07)                                                    | 1.10 (0.60-2.01)                                                     |
| <b>Lost somebody close</b>                                 |                  |                                                               |                                                                |                                                                     |                                                                      |
| No                                                         | 1489<br>(94.90%) | 1.00                                                          |                                                                | 1.00                                                                | 1.00                                                                 |
| Yes                                                        | 73 (5.10%)       | 1.85 (1.06-3.22)                                              | 1.55 (0.86-2.79)                                               | 0.63 (0.32-1.26)                                                    | 0.51 (0.22-1.17)                                                     |
| <b>Had to change delay or major plan</b>                   |                  |                                                               |                                                                |                                                                     |                                                                      |
| No                                                         | 1198<br>(76.26%) | 1.00                                                          | 1.00                                                           | 1.00                                                                | 1.00                                                                 |
| Yes                                                        | 364 (23.74%)     | 2.50 (1.89-3.32)                                              | 2.27 (1.69-3.06)                                               | 1.16 (0.85-1.57)                                                    | 0.97 (0.68-1.38)                                                     |
| <b>Difficulties with family/other social relationships</b> |                  |                                                               |                                                                |                                                                     |                                                                      |
| No                                                         | 1284<br>(80.53%) | 1.00                                                          | 1.00                                                           | 1.00                                                                | 1.00                                                                 |
| Yes                                                        | 278 (19.47%)     | 5.29 (3.85-7.27)                                              | 4.64 (3.33-6.46)                                               | 1.70 (1.22-2.36)                                                    | 1.56 (1.05-2.30)                                                     |
| <b>Difficulties with internet access</b>                   |                  |                                                               |                                                                |                                                                     |                                                                      |
| No                                                         | 1455<br>(92.95%) | 1.00                                                          | 1.00                                                           | 1.00                                                                | 1.00                                                                 |
| Yes                                                        | 107 (7.05%)      | 1.84 (1.17-2.88)                                              | 1.88 (1.18-3.00)                                               | 1.06 (0.65-1.72)                                                    | 1.31 (0.75-2.26)                                                     |
| <b>Work difficulties</b>                                   |                  |                                                               |                                                                |                                                                     |                                                                      |
| No                                                         | 1293<br>(81.03%) | 1.00                                                          | 1.00                                                           | 1.00                                                                | 1.00                                                                 |

|                               | N (%)         | Common Mental Disorders (AOR 95% CI) *<br>N = 376<br>(25.97%) | Common Mental Disorders (AOR 95% CI) **<br>N = 376<br>(25.97%) | Hazardous drinking (AUDIT ≥8) (AOR 95% CI) *<br>N = 367<br>(27.82%) | Hazardous drinking (AUDIT ≥8) (AOR 95% CI) **<br>N = 367<br>(27.82%) |
|-------------------------------|---------------|---------------------------------------------------------------|----------------------------------------------------------------|---------------------------------------------------------------------|----------------------------------------------------------------------|
| Yes                           | 269 (18.97%)  | 4.12 (3.01-5.65)                                              | 3.68 (2.64-5.14)                                               | 1.39 (1.00-1.94)                                                    | 1.40 (0.94-2.09)                                                     |
| <b>Difficulties with pets</b> |               |                                                               |                                                                |                                                                     |                                                                      |
| No                            | 1522 (97.46%) | 1.00                                                          | 1.00                                                           | 1.00                                                                | 1.00                                                                 |
| Yes                           | 40 (2.54%)    | 2.79 (1.44-5.41)                                              | 2.52 (1.25-5.06)                                               | 0.90 (0.40-2.05)                                                    | 0.88 (0.36-2.17)                                                     |
| <b>Boredom</b>                |               |                                                               |                                                                |                                                                     |                                                                      |
| No                            | 1210 (75.06%) | 1.00                                                          | 1.00                                                           | 1.00                                                                | 1.00                                                                 |
| Yes                           | 352 (24.94%)  | 2.88 (2.15-3.85)                                              | 2.69 (1.98-3.65-)                                              | 1.75 (1.28-2.39)                                                    | 1.55 (1.09-2.20)                                                     |

\* Adjusted for sex, age, education, marital status, rank, service

\*\* Adjusted for sex, age, education, marital status, rank, service and phase 3 GHQ or AUDIT-8 as appropriate
